# Supplementary material for: Mitochondrial phenotypes in purified human immune cell subtypes and cell mixtures
Source: eLife. 2021 Oct 26;10:e70899. doi: 10.7554/eLife.70899 (PMC8612706; doi:10.7554/eLife.70899)
Supplement: Appendix 2—figure 1—source data 1. [file elife-70899-app2-fig1-data1.xlsx]

## Sheet: b
				MHI
Subject id	Age	Sex	Ethnicity	B cells	Neutrophils	Natural killers	Monocytes	CD8+ naïve	CD4+ naïve	CD8+ CM & EM	CD4+ CM & EM	PBMCs
1	23	F	Asian	50.0298	NA	NA	122.757	78.9483	72.8174	66.279	69.3483	104.737
2	23	F	Asian	NA	85.904	NA	121.253	77.8796	84.8304	90.5992	100.753	105.081
3	25	F	Asian	NA	164.232	127.92	143.633	NA	NA	NA	NA	NA
4	27	F	White	NA	65.2299	NA	144.573	86.5477	86.9497	116.373	84.9963	112.705
5	32	F	White	83.5048	NA	NA	140.427	113.786	110.573	95.6306	128.12	112.472
6	32	F	White	NA	98.0332	103.072	147.684	77.6678	92.7219	NA	100.214	119.455
7	40	F	White	67.1408	87.7899	NA	113.353	NA	76.2071	104.236	91.5465	96.9036
8	41	F	White	70.3114	NA	104.206	NA	76.3703	88.5227	104.834	91.7188	87.2861
9	43	F	African American	NA	81.7562	126.956	142.586	NA	87.0246	104.865	94.024	98.1366
10	52	F	White	67.4947	NA	112.285	123.463	76.2426	85.439	NA	78.1965	89.9958
11	57	F	Asian	81.1894	98.4591	92.4934	116.013	NA	96.4819	NA	74.149	101.56
12	24	M	Asian	NA	NA	117.884	129.884	82.9861	80.9299	114.572	87.5656	105.883
13	25	M	White	91.4932	79.8292	NA	142.854	NA	91.7933	90.8769	98.4943	114.83
14	26	M	Asian	NA	NA	105.632	123.664	74.3136	85.5552	104.283	86.5518	127.239
15	29	M	African American	NA	NA	NA	141.536	75.4925	100.207	72.991	94.6395	100.477
16	33	M	White	60.1684	63.3519	78.3682	95.3119	NA	56.8072	NA	89.826	98.8829
17	34	M	White	68.0817	NA	129.018	131.703	102.95	105	NA	84.6161	111.465
18	40	M	White	82.4665	NA	114.993	NA	88.9358	78.8519	NA	102.67	48.7724
19	45	M	White	83.7519	99.9654	137.489	NA	NA	91.5866	106.814	105.232	123.002
20	53	M	White	NA	85.1595	74.4007	109.705	NA	NA	NA	75.9298	118.338
21	56	M	Asian	92.9618	86.0672	128.895	122.37	NA	NA	118.83	119.459	123.701

## Sheet: c
*Spearman's r values for correlations between cell subtypes across mitochondrial features, calculated in Prism (GraphPad 8). For raw values see source data for Figure 4 and Appendix 2-figure 1b.
	Spearman's r										p values
CS activity		PBMC	B cells	Neutrophils	Natural killers	Monocytes	CD8+ naive	CD4+ naive	CD8+ CM & EM			PBMC	B cells	Neutrophils	Natural killers	Monocytes	CD8+ naive	CD4+ naive	CD8+ CM & EM
	PBMC										PBMC
	B cells	0.272727									B cells	0.391163
	Neutrophils	0.6	0.542857								Neutrophils	0.0562284	0.297222
	Natural killers	0.489011	0.619048	0.547619							Natural killers	0.0929568	0.11498	0.170982
	Monocytes	0.776961	0.633333	0.881818	0.863636						Monocytes	0.00040634	0.0760362	0.000694344	0.00115781
	CD8+ naive	0.433566	0.485714	NA	0.428571	0.636364					CD8+ naive	0.161609	0.355556	NA	0.353571	0.0544307
	CD4+ naive	0.675955	0.518182	0.383333	0.718182	0.778571	0.657343				CD4+ naive	0.00207395	0.107249	0.3125	0.0162335	0.000992975	0.0237755
	CD8+ CM & EM	0.351648	0.321429	0.75	0.542857	0.809091	0.452381	0.496503			CD8+ CM & EM	0.239194	0.497619	0.0662698	0.297222	0.0039408	0.26746	0.104138
	CD4+ CM & EM	0.542857	0.230769	0.754545	0.917582	0.845588	0.468531	0.682147	0.802198		CD4+ CM & EM	0.0133872	0.470802	0.00984598	3.17378e-05	4.29509e-05	0.127507	0.00181708	0.0015505
mtDNAcn		PBMC	B cells	Neutrophils	Natural killers	Monocytes	CD8+ Naive	CD4+ Naive	CD8+ CM & EM			PBMC	B cells	Neutrophils	Natural killers	Monocytes	CD8+ Naive	CD4+ Naive	CD8+ CM & EM
	PBMC										PBMC
	B cells	0.286713									B cells	0.366344
	Neutrophils	0.0727273	-0.714286								Neutrophils	0.838493	0.136111
	Natural killers	0.28022	0.428571	0.380952							Natural killers	0.35348	0.299206	0.359871
	Monocytes	0.5	0.566667	0.690909	0.709091						Monocytes	0.0430043	0.120574	0.022598	0.0181946
	CD8+ Naive	0.20979	0.485714	NA	0.928571	0.745455					CD8+ Naive	0.513713	0.355556	NA	0.00674603	0.0174058
	CD4+ Naive	0.491482	0.863636	0.316667	0.881818	0.866846	0.767076				CD4+ Naive	0.0383168	0.00115781	0.41008	0.000694344	6.57013e-05	0.0050055
	CD8+ CM & EM	0.280605	0.571429	-0.25	0.2	0.50114	0.275454	0.419298			CD8+ CM & EM	0.350112	0.2	0.594841	0.713889	0.118728	0.507044	0.173668
	CD4+ CM & EM	0.449624	0.713287	0.4	0.543956	0.595588	0.629371	0.735158	0.651995		CD4+ CM & EM	0.0467019	0.0117658	0.224952	0.0581575	0.0132594	0.0322963	0.000508893	0.0182776
CI activity		PBMC	B cells	Neutrophils	Natural killers	Monocytes	CD8+ Naive	CD4+ Naive	CD8+ CM & EM			PBMC	B cells	Neutrophils	Natural killers	Monocytes	CD8+ Naive	CD4+ Naive	CD8+ CM & EM
	PBMC										PBMC
	B cells	-0.0559441									B cells	0.869159
	Neutrophils	0.546698	0.40584								Neutrophils	0.0851695	0.433333
	Natural killers	0.18707	0.5	-0.610789							Natural killers	0.537558	0.216171	0.115774
	Monocytes	0.0784314	0.0833333	-0.273349	0.0683373						Monocytes	0.765652	0.843182	0.412721	0.844299
	CD8+ Naive	0.3993	0.542857	NA	0.214286	0.395139					CD8+ Naive	0.197899	0.297222	NA	0.661508	0.25725
	CD4+ Naive	0.145511	0.772727	0.35	0.409091	0.292857	0.273205				CD4+ Naive	0.564541	0.00744268	0.358581	0.214077	0.288787	0.387027
	CD8+ CM & EM	-0.104396	0.0357143	0.234244	-0.0285714	0.245455	0.571429	0.111888			CD8+ CM & EM	0.737022	0.963492	0.623016	1	0.468404	0.151141	0.732948
	CD4+ CM & EM	0.100113	0.00700526	0.141553	0.112792	0.409816	0.236842	0.375194	-0.360883		CD4+ CM & EM	0.674523	0.986451	0.675419	0.712914	0.103053	0.453226	0.124976	0.224589
CII activity		PBMC	B cells	Neutrophils	Natural killers	Monocytes	CD8+ Naive	CD4+ Naive	CD8+ CM & EM			PBMC	B cells	Neutrophils	Natural killers	Monocytes	CD8+ Naive	CD4+ Naive	CD8+ CM & EM
	PBMC										PBMC
	B cells	0.559441									B cells	0.0628454
	Neutrophils	0.163636	-0.0285714								Neutrophils	0.633662	1
	Natural killers	0.159341	0.547619	0.419169							Natural killers	0.604013	0.170982	0.302381
	Monocytes	0.294118	0.8	0.132119	0.809091						Monocytes	0.251092	0.0138283	0.698399	0.0039408
	CD8+ Naive	0.685315	0.714286	NA	0.5	0.624242					CD8+ Naive	0.0170149	0.136111	NA	0.266667	0.0603158
	CD4+ Naive	0.479876	0.609091	-0.0333333	0.645455	0.660714	0.881119				CD4+ Naive	0.0438646	0.0519132	0.948391	0.0368481	0.00894702	0.000334997
	CD8+ CM & EM	-0.0549451	-0.0714286	0.714286	-0.485714	0.154545	-0.0952381	-0.027972			CD8+ CM & EM	0.863147	0.906349	0.0880952	0.355556	0.65381	0.840129	0.938839
	CD4+ CM & EM	0.129323	0.132867	0.318182	0.159341	0.210784	0.412587	0.285862	0.758242		CD4+ CM & EM	0.586853	0.68316	0.341517	0.604013	0.415264	0.184466	0.25017	0.00379147
CIV activity		PBMC	B cells	Neutrophils	Natural killers	Monocytes	CD8+ Naive	CD4+ Naive	CD8+ CM & EM			PBMC	B cells	Neutrophils	Natural killers	Monocytes	CD8+ Naive	CD4+ Naive	CD8+ CM & EM
	PBMC										PBMC
	B cells	-0.0630474									B cells	0.846719
	Neutrophils	-0.0454545	0.371429								Neutrophils	0.903251	0.497222
	Natural killers	-0.294361	0.0952381	0.690476							Natural killers	0.326605	0.840129	0.0693948
	Monocytes	0.428922	0.416667	0.4	-0.0364466						Monocytes	0.0873332	0.269582	0.224952	0.918428
	CD8+ Naive	0.132867	0.314286	NA	-0.0357143	0.139394					CD8+ Naive	0.68316	0.563889	NA	0.963492	0.707164
	CD4+ Naive	0.366357	0.436364	0.633333	-0.290909	0.696429	0.125874				CD4+ Naive	0.134837	0.182568	0.0760362	0.386337	0.00509131	0.699883
	CD8+ CM & EM	0.305365	0.357143	-0.357143	-0.371429	0.118182	-0.166667	0.272727			CD8+ CM & EM	0.308129	0.444444	0.444444	0.497222	0.73453	0.703323	0.391163
	CD4+ CM & EM	0.142911	0.328671	0.0454545	0.258242	-0.129902	-0.0769231	0.122807	0.208791		CD4+ CM & EM	0.547798	0.297333	0.903251	0.393931	0.618653	0.817079	0.627346	0.493443
MHI		PBMC	B cells	Neutrophils	Natural killers	Monocytes	CD8+ Naive	CD4+ Naive	CD8+ CM & EM			PBMC	B cells	Neutrophils	Natural killers	Monocytes	CD8+ Naive	CD4+ Naive	CD8+ CM & EM
	PBMC										PBMC
	B cells	0.566434									B cells	0.0590525
	Neutrophils	0.309091	0.142857								Neutrophils	0.355967	0.802778
	Natural killers	0.17033	0.571429	0.547619							Natural killers	0.578618	0.151141	0.170982
	Monocytes	0.27451	0.483333	0.190909	0.545455						Monocytes	0.28526	0.1938	0.576535	0.0876368
	CD8+ Naive	0.0559441	0.6	NA	0.642857	0.175758					CD8+ Naive	0.869159	0.241667	NA	0.138889	0.632142
	CD4+ Naive	0.384933	0.681818	0.566667	0.172727	0.585714	0.0979021				CD4+ Naive	0.114708	0.0251296	0.120574	0.614656	0.0241881	0.766437
	CD8+ CM & EM	0.346154	0.535714	0.0714286	0.657143	0.136364	0.285714	-0.020979			CD8+ CM & EM	0.247114	0.235714	0.906349	0.175	0.693713	0.500794	0.95596
	CD4+ CM & EM	0.159398	0.769231	0.290909	0.505495	0.311275	0.216783	0.244582	0.0384615		CD4+ CM & EM	0.502052	0.00491497	0.386337	0.0812284	0.22345	0.499001	0.328004	0.906284

## Sheet: d
*Individual Spearman's r values (see source data Appendix 2-figure 1c) were first transformed to Fisher's Z, then averaged together before transforming back to Spearman's r
	Avg Spearman's r
CS	0.63
mtDNAcn	0.53
CII	0.4
MHI	0.37
CI	0.21
CIV	0.17
