# Supplementary material for: Mitochondrial phenotypes in purified human immune cell subtypes and cell mixtures
Source: eLife. 2021 Oct 26;10:e70899. doi: 10.7554/eLife.70899 (PMC8612706; doi:10.7554/eLife.70899)
Supplement: Figure 1—figure supplement 3—source data 1. [file elife-70899-fig1-figsupp3-data1.xlsx]

## Sheet: a
*Effect sizes calculated using https://www.cem.org/effect-size-calculator excel template
*Fold change values highlighted in green are negatively adjusted for the higher mean value in men compared to women
*For raw values see source data for Figure 1b
	Women			Men
CBC data	mean	n	SD	mean	n	SD	Hedges' g	Upper 95% C.I.	Lower 95% C.I.	Fold change (Women/Men)
Platelet (10^9/L)	261.909	11	56.0686	218.6	10	52.1604	0.766276	1.65345	-0.120896	1.19812
Lymphocytes (%)	38.3818	11	8.90414	33.66	10	10.7959	0.460353	1.32797	-0.40726	1.14028
Basophils (%)	0.718182	11	0.376346	0.65	10	0.427525	0.163047	1.02084	-0.694741	1.1049
Neutrophils (%)	50.6818	11	8.61137	51.3	10	6.88105	-0.0756927	0.780983	-0.932369	-0.98795
Eosinophils (%)	1.84545	11	1.58263	2.84	10	1.51232	-0.616022	0.260379	-1.49242	-0.649808
Monocytes (%)	8.07273	11	0.943494	11.21	10	5.52036	-0.780065	0.108206	-1.66834	-0.720136

## Sheet: b
Spearman's r correlations between cell proportions and age, calculated in Prism 8 (GraphPad)
*For raw values see source data for Figure 1b
	Spearman's r	p value
Monocytes (%)	0.187317	0.416179
Neutrophils (%)	0.06632	0.775169
Basophils (%)	0.0620098	0.789453
Eosinophils (%)	0.0514156	0.824832
Lymphocytes (%)	-0.174903	0.448271
Platelet (10^9/L)	-0.31935	0.158215
