# Supplementary material for: Mitochondrial phenotypes in purified human immune cell subtypes and cell mixtures
Source: eLife. 2021 Oct 26;10:e70899. doi: 10.7554/eLife.70899 (PMC8612706; doi:10.7554/eLife.70899)
Supplement: Figure 1—source data 1. [file elife-70899-fig1-data1.xlsx]

## Sheet: 1b
Cell proportion (%) data obtained from complete blood count (CBC)
Subject id	Age	Sex	Ethnicity	Basophils (%)	Eosinophils (%)	Lymphocytes (%)	Monocytes (%)	Neutrophils (%)	Platelets (10^9/L)
1	23	F	Asian	0.3	0.5	34	8.3	56.6	278
2	23	F	Asian	1.2	1.3	42.4	7.8	47.1	260
3	25	F	Asian	0.6	1.9	53.4	9.9	34	355
4	27	F	White	0.5	1.4	38.6	9.1	50.2	322
5	32	F	White	1.1	3.1	28.7	8	58.8	272
6	32	F	White	0.4	5.4	32.2	7	54.6	157
7	40	F	White	0.8	1.1	23.3	7.9	66.6	286
8	41	F	White	0.5	0.9	40.6	8.1	49.4	257
9	43	F	African American	0.8	0.4	46.8	6.5	45.1	199
10	52	F	White	1.4	3.7	34.7	8.7	51.3	285
11	57	F	Asian	0.3	0.6	47.5	7.5	43.8	210
12	24	M	Asian	1.6	3.4	36.4	7.6	51	299
13	25	M	White	0.4	1.1	42.6	9.7	45.4	200
14	26	M	Asian	0.4	2.2	32.6	6.3	58.1	223
15	29	M	African American	0.2	1	49.8	9.6	39.2	207
16	33	M	White	0.5	4.7	22.1	11.8	60.5	220
17	34	M	White	0.4	5.7	37.8	10	46.1	223
18	40	M	White	0.6	2.9	36	11.7	48.4	185
19	45	M	White	1.1	2.2	31.5	9.2	55.6	259
20	53	M	White	0.4	3.4	10.7	26.2	58.9	106
21	56	M	Asian	0.9	1.8	37.1	10	49.8	264
average				0.685714	2.31905	36.1333	9.56667	50.9762	241.286

## Sheet: 1c
Cell proportion (%) data obtained from flow cytometry
Subject id	Age	Sex	Ethnicity	B cells (%)	Neutrophils (%)	Natural killers (%)	Monocytes (%)	CD8+ naïve (%)	CD8+ CM (%)	CD8+ EM (%)	CD8+ TEMRA (%)	CD4+ naïve (%)	CD4+ CM (%)	CD4+ EM (%)	CD4+ TEMRA (%)
1	23	F	Asian	7.52028	6.50192	2.7878	7.59301	7.05062	0.913175	8.091	6.40037	8.99554	12.1948	3.25126	0.00948564
2	23	F	Asian	7.44883	21.2413	7.4485	10.5424	7.38302	1.07738	6.0426	0.597372	12.5748	5.65441	3.63107	0.141281
3	25	F	Asian	15.3252	1.38023	2.72634	2.20837	10.8092	0.942899	9.43519	1.75553	12.2391	7.13067	5.31931	0.108557
4	27	F	White	6.92769	7.30967	3.97789	10.2693	9.33647	1.88455	4.85791	0.748131	19.6598	15.3425	2.36581	0.0385672
5	32	F	White	11.7386	0.925226	5.83851	14.884	5.43822	1.79705	4.77288	3.24773	17.0644	10.5036	3.72547	0.148946
6	32	F	White	5.35921	10.4704	12.3076	7.40993	5.74547	1.15368	3.95091	0.622802	17.8321	9.22588	3.68222	0.0451357
7	40	F	White	8.60489	14.8372	5.99408	11.2597	3.26845	0.998221	5.21099	1.88813	12.8985	10.1409	5.99558	0.169351
8	41	F	White	3.59127	1.91081	7.01011	0.87682	5.9737	1.18186	3.43372	1.01159	3.22362	31.0272	3.6409	0.0142531
9	43	F	African American	0.000812975	3.73446	7.81966	6.65118	3.05458	2.41314	5.14648	3.37083	9.20102	11.7337	11.4326	0.568618
10	52	F	White	7.99354	5.3063	5.73493	16.2999	6.65332	1.43363	3.22009	0.738226	25.83	8.37062	3.14165	0.0665193
11	57	F	Asian	6.31234	11.8855	11.4276	8.45724	5.51332	1.17775	6.79113	4.87359	14.7814	5.46112	8.01675	1.11792
12	24	M	Asian	4.18516	0.672151	18.438	9.98211	16.7852	0.928747	3.0867	1.57128	12.0319	8.35607	3.65031	0.00838093
13	25	M	White	5.80224	7.23759	5.67913	10.2384	5.29931	2.43631	11.1834	6.9487	8.9863	11.7877	5.32589	0.199354
14	26	M	Asian	5.75726	2.75451	8.17611	8.38321	8.45726	1.02791	7.73595	4.88798	13.0528	9.22292	9.1553	0.293873
15	29	M	African American	5.24442	0.947997	1.90894	13.385	7.43989	1.75899	2.35804	27.9388	6.04478	15.9607	3.96209	0.00907492
16	33	M	White	9.7949	10.782	13.4849	22.8204	4.27182	0.712209	1.76055	0.622924	3.19149	13.7963	3.32725	0.0138463
17	34	M	White	11.8125	2.47713	10.9096	13.3943	9.77391	1.83289	2.92174	2.19282	16.676	11.6975	2.6828	0.0287335
18	40	M	White	5.44254	1.14881	12.4466	13.3933	7.44331	1.41713	4.42784	1.18895	13.5317	14.3367	3.42681	0.0446565
19	45	M	White	6.63939	15.1587	11.4192	4.09729	5.01069	2.73848	3.89472	0.418123	8.13648	11.455	6.0438	0.0500972
20	53	M	White	0.00444836	18.7965	3.58692	49.1419	2.26096	0.830304	1.49739	0.504547	0.570246	5.61486	4.03312	0.0477343
21	56	M	Asian	3.74695	6.93994	16.2407	12.0467	1.30256	3.22389	5.81929	6.43676	2.48997	10.4257	7.82553	0.0808025
average				6.63107	7.25802	8.35063	12.0636	6.58435	1.51811	5.03041	3.71263	11.3815	11.4018	4.93503	0.152628

## Sheet: 1d
*Effect sizes calculated using https://www.cem.org/effect-size-calculator excel template
*Fold change values highlighted in green are negatively adjusted for the higher mean value in men compared to women
*For raw values see source data for Figure 1c
	Women			Men
	mean	n	SD	mean	n	SD	Hedges' g	Upper 95% C.I.	Lower 95% C.I.	Fold change (Women/Men)
B cells (%)	7.34751	11	3.97804	5.84298	10	3.22567	0.396641	1.26137	-0.468089	1.25749
Monocytes (%)	8.76836	11	4.67812	15.6883	10	12.6889	-0.708947	0.173855	-1.59175	-0.558912
Natural killers (%)	6.64301	11	3.10399	10.229	10	5.36639	-0.795748	0.0937938	-1.68529	-0.649428
Neutrophils (%)	7.773	11	6.33905	6.69153	10	6.39896	0.163031	1.02082	-0.694757	1.16162
CD4+ T cells (%)	34.5503	11	6.52491	27.8298	10	7.05141	0.951563	1.85499	0.0481325	1.24149
CD4+ naïve (%)	14.0273	11	6.0598	8.47117	10	5.36384	0.929044	1.83033	0.0277596	1.65589
CD4+ CM (%)	11.5259	11	7.10029	11.2654	10	3.04867	0.0449717	0.90145	-0.811506	1.02313
CD4+ EM (%)	4.92751	11	2.68417	4.94329	10	2.13151	-0.00621107	0.850161	-0.862583	-0.996809
CD4+ TEMRA (%)	0.220785	11	0.335815	0.0776552	10	0.0944464	0.544878	1.41696	-0.327202	2.84314
CD8+ T cells (%)	16.7973	11	4.77543	19.1895	10	10.1082	-0.295466	0.565554	-1.15648	-0.875336
CD8+ naïve (%)	6.38422	11	2.29858	6.80449	10	4.40691	-0.116554	0.740541	-0.973649	-0.938236
CD8+ CM (%)	1.36121	11	0.476717	1.69069	10	0.870617	-0.457128	0.410329	-1.32459	-0.805124
CD8+ EM (%)	5.54117	11	1.92765	4.46856	10	3.03384	0.409696	1.27498	-0.455591	1.24004
CD8+ TEMRA (%)	2.29584	11	1.95363	5.27109	10	8.339	-0.483099	0.385645	-1.35184	-0.435554

## Sheet: 1e
	Cell proportion (%) data obtained from flow cytometry
	x	y			x	y
	CD4+ naïve (%)	CD8+ naïve (%)			Monocytes (%)	B cells (%)
Women	8.99554	7.05062		Women	7.59301	7.52028
	12.5748	7.38302			10.5424	7.44883
	12.2391	10.8092			2.20837	15.3252
	19.6598	9.33647			10.2693	6.92769
	17.0644	5.43822			14.884	11.7386
	17.8321	5.74547			7.40993	5.35921
	12.8985	3.26845			11.2597	8.60489
	3.22362	5.9737			0.87682	3.59127
	9.20102	3.05458			6.65118	0.000812975
	25.83	6.65332			16.2999	7.99354
	14.7814	5.51332			8.45724	6.31234
Men	12.0319	16.7852		Men	9.98211	4.18516
	8.9863	5.29931			10.2384	5.80224
	13.0528	8.45726			8.38321	5.75726
	6.04478	7.43989			13.385	5.24442
	3.19149	4.27182			22.8204	9.7949
	16.676	9.77391			13.3943	11.8125
	13.5317	7.44331			13.3933	5.44254
	8.13648	5.01069			4.09729	6.63939
	0.570246	2.26096			49.1419	0.00444836
	2.48997	1.30256			12.0467	3.74695

## Sheet: 1f
Spearman's r correlations between cell proportions and age, calculated in Prism 8 (GraphPad)
*For raw values see source data for Figure 1c
	Spearman's r	p value
CD4+ EM (%)	0.307543	0.175042
CD8+ CM (%)	0.312846	0.167339
Natural killers (%)	0.278284	0.221906
Neutrophils (%)	0.251626	0.271197
Monocytes (%)	0.207805	0.366051
CD4+ TEMRA (%)	0.202234	0.379327
CD4+ T cells (%)	0.157998	0.493965
CD4+ CM (%)	-0.102731	0.657678
CD4+ naïve (%)	-0.117685	0.611418
CD8+ TEMRA (%)	-0.15252	0.509243
B cells (%)	-0.295285	0.193768
CD8+ EM (%)	-0.3329	0.140329
CD8+ T cells (%)	-0.524058	0.0147468
CD8+ naïve (%)	-0.609756	0.00333814
