# Supplementary material for: Mitochondrial phenotypes in purified human immune cell subtypes and cell mixtures
Source: eLife. 2021 Oct 26;10:e70899. doi: 10.7554/eLife.70899 (PMC8612706; doi:10.7554/eLife.70899)
Supplement: Figure 2—figure supplement 1—source data 1. — CBC, complete blood count; PBMC, peripheral blood mononuclear cell. [file elife-70899-fig2-figsupp1-data1.xlsx]

## Sheet: Fig 2-fig supp. 1
Spearman's r correlations between CBC-derived cell type proportion and PBMC's enzymatic activity, calculated in Prism 8 (GraphPad).
		PBMCs enzymatic activity							Raw data				CBC-derived cell proportions						PBMCs enzymatic activity
		CS	mtDNAcn	CI	CII	CIV	MHI		Subject id	Age	Sex	Ethnicity	Basophils (%)	Eosinophils (%)	Lymphocytes (%)	Monocytes (%)	Neutrophils (%)	Platelets (10^9/L)	CS activity	mtDNAcn	CI acitivty	CII activity	CIV activity	MHI
CBC cell proportion (%)	Basophils (%)	0.1945	0.2727	-0.03342	0.2499	0.06079	-0.1041		1	23	F	Asian	0.3	0.5	34	8.3	56.6	278	47.6253	367.063	3.03303	26.8376	3.81006	104.737
	Eosinophils (%)	0.3801	0.5645	0.5615	0.4208	0.4714	0.2665		2	23	F	Asian	1.2	1.3	42.4	7.8	47.1	260	49.5	356.308	2.72133	26.5499	4.68321	105.081
	Lymphocytes (%)	-0.3414	-0.4677	-0.5639	-0.3534	-0.4475	-0.2165		3	25	F	Asian	0.6	1.9	53.4	9.9	34	355	NA	NA	NA	NA	NA	NA
	Monocytes (%)	0.09402	0.03385	-0.05716	0.1309	0.12	-0.02332		4	27	F	White	0.5	1.4	38.6	9.1	50.2	322	51.9901	327.983	2.53719	31.6807	5.12614	112.705
	Neutrophils (%)	0.3609	0.3744	0.5203	0.3519	0.4144	0.203		5	32	F	White	1.1	3.1	28.7	8	58.8	272	61.4562	470.179	3.75571	33.8493	5.48733	112.472
	Platelet (10^9/L)	0.3249	0.1098	0.06694	0.3806	0.03085	-0.0331		6	32	F	White	0.4	5.4	32.2	7	54.6	157	48.9559	409.387	3.57653	30.8319	4.8695	119.455
									7	40	F	White	0.8	1.1	23.3	7.9	66.6	286	73.3951	529.612	3.10784	42.3964	4.75324	96.9036
									8	41	F	White	0.5	0.9	40.6	8.1	49.4	257	51.6483	373.588	1.5882	28.6326	4.49693	87.2861
									9	43	F	African American	0.8	0.4	46.8	6.5	45.1	199	40.1057	370.903	2.30836	24.5012	3.92907	98.1366
									10	52	F	White	1.4	3.7	34.7	8.7	51.3	285	74.7237	512.07	3.14119	37.6411	4.16766	89.9958
									11	57	F	Asian	0.3	0.6	47.5	7.5	43.8	210	48.8477	402.335	2.59517	32.3772	3.88514	101.56
									12	24	M	Asian	1.6	3.4	36.4	7.6	51	299	43.6225	436.076	2.45301	34.0547	4.29216	105.883
									13	25	M	White	0.4	1.1	42.6	9.7	45.4	200	55.1691	431.41	3.0405	38.872	5.07875	114.83
									14	26	M	Asian	0.4	2.2	32.6	6.3	58.1	223	48.0395	379.77	3.48923	31.7782	5.42734	127.239
									15	29	M	African American	0.2	1	49.8	9.6	39.2	207	28.2424	293.996	1.79232	20.7617	3.54798	100.477
									16	33	M	White	0.5	4.7	22.1	11.8	60.5	220	76.9139	435.376	3.36446	39.5764	4.50742	98.8829
									17	34	M	White	0.4	5.7	37.8	10	46.1	223	94.8099	529.991	4.01829	55.2524	6.34958	111.465
									18	40	M	White	0.6	2.9	36	11.7	48.4	185	36.2258	380.194	0.41	15.4287	3.15099	48.7724
									19	45	M	White	1.1	2.2	31.5	9.2	55.6	259	57.5564	428.966	3.31923	40.4208	5.82281	123.002
									20	53	M	White	0.4	3.4	10.7	26.2	58.9	106	44.8676	389.777	2.76502	27.3409	6.14504	118.338
									21	56	M	Asian	0.9	1.8	37.1	10	49.8	264	36.3053	348.102	2.4703	33.4566	4.49618	123.701
