# Supplementary material for: Mitochondrial phenotypes in purified human immune cell subtypes and cell mixtures
Source: eLife. 2021 Oct 26;10:e70899. doi: 10.7554/eLife.70899 (PMC8612706; doi:10.7554/eLife.70899)
Supplement: Figure 2—source data 1. — PBMC, peripheral blood mononuclear cell. [file elife-70899-fig2-data1.xlsx]

## Sheet: 2a
Spearman's r correlations between cell type proportion and PBMC's enzymatic activity, calculated in Prism 8 (GraphPad). For raw values see source data for Figure 2b.
		PBMCs enzymatic activity
		CS	mtDNAcn	CI	CII	CIV	MHI
Cell type proportion (%)	B cells (%)	0.7789	0.5203	0.6662	0.5654	0.2775	-0.09023
	Neutrophils (%)	0.2632	-0.03308	0.2256	0.1564	0.3099	0.2391
	Natural killers (%)	-0.05714	0.2361	0.01805	0.2496	-0.0707	0.08872
	Monocytes (%)	0.2045	0.2947	0.197	0.1684	0.1249	-0.1218
	CD8+ naïve (%)	-0.04211	-0.05564	-0.06316	-0.1383	-0.1068	-0.08722
	CD4+ naïve (%)	0.3278	0.3143	0.3398	0.1173	0.06769	-0.0797
	CD8+ CM (%)	0.009023	-0.1444	-0.09774	0.1128	0.1113	0.215
	CD8+ EM (%)	-0.1173	-0.2602	-0.01053	-0.09323	-0.1234	0.1955
	CD8+ TEMRA (%)	-0.3519	-0.2195	-0.1835	-0.08722	-0.3565	0.01654
	CD4+ CM (%)	-0.01654	-0.3113	-0.2977	-0.1925	-0.2159	-0.3218
	CD4+ EM (%)	-0.3654	-0.1098	-0.08271	-0.02406	0.02482	0.3143
	CD4+ TEMRA (%)	0.09023	0.09925	0.1925	0.1083	0.1805	0.1835

## Sheet: 2b
				Cell type proportions (%)												PBMCs enzymatic activity
Subject id	Age	Sex	Ethnicity	B cell %	Neutrophils %	Natural killers %	Monocytes %	CD8+ naive %	CD4+ naive %	CD8+ CM %	CD8+ EM %	CD8+ TEMRA %	CD4+ CM %	CD4+ EM %	CD4+ TEMRA %	PBMCs CS	PBMCs mtDNAcn	PBMCs CI	PBMCs CII	PBMCs CIV	PBMCs MHI
1	23	F	Asian	7.52028	6.50192	2.7878	7.59301	7.05062	8.99554	0.913175	8.091	6.40037	12.1948	3.25126	0.00948564
2	23	F	Asian	7.44883	21.2413	7.4485	10.5424	7.38302	12.5748	1.07738	6.0426	0.597372	5.65441	3.63107	0.141281	48.0395	379.77	3.49	31.78	5.43	127.24
3	25	F	Asian	15.3252	1.38023	2.72634	2.20837	10.8092	12.2391	0.942899	9.43519	1.75553	7.13067	5.31931	0.108557	28.2424	294	1.79	20.76	3.55	100.48
4	27	F	White	6.92769	7.30967	3.97789	10.2693	9.33647	19.6598	1.88455	4.85791	0.748131	15.3425	2.36581	0.0385672	36.2258	380.19	0.41	15.43	3.15	48.77
5	32	F	White	11.7386	0.925226	5.83851	14.884	5.43822	17.0644	1.79705	4.77288	3.24773	10.5036	3.72547	0.148946	61.4562	470.18	3.76	33.85	5.49	112.47
6	32	F	White	5.35921	10.4704	12.3076	7.40993	5.74547	17.8321	1.15368	3.95091	0.622802	9.22588	3.68222	0.0451357	51.9901	327.98	2.54	31.68	5.13	112.7
7	40	F	White	8.60489	14.8372	5.99408	11.2597	3.26845	12.8985	0.998221	5.21099	1.88813	10.1409	5.99558	0.169351	48.9559	409.39	3.58	30.83	4.87	119.46
8	41	F	White	3.59127	1.91081	7.01011	0.87682	5.9737	3.22362	1.18186	3.43372	1.01159	31.0272	3.6409	0.0142531	94.8099	529.99	4.02	55.25	6.35	111.47
9	43	F	African American	0.00081298	3.73446	7.81966	6.65118	3.05458	9.20102	2.41314	5.14648	3.37083	11.7337	11.4326	0.568618	55.1691	431.41	3.04	38.87	5.08	114.83
10	52	F	White	7.99354	5.3063	5.73493	16.2999	6.65332	25.83	1.43363	3.22009	0.738226	8.37062	3.14165	0.0665193	47.6253	367.06	3.03	26.84	3.81	104.74
11	57	F	Asian	6.31234	11.8855	11.4276	8.45724	5.51332	14.7814	1.17775	6.79113	4.87359	5.46112	8.01675	1.11792	76.9139	435.38	3.36	39.58	4.51	98.88
12	24	M	Asian	4.18516	0.672151	18.438	9.98211	16.7852	12.0319	0.928747	3.0867	1.57128	8.35607	3.65031	0.00838093	73.3951	529.61	3.11	42.4	4.75	96.9
13	25	M	White	5.80224	7.23759	5.67913	10.2384	5.29931	8.9863	2.43631	11.1834	6.9487	11.7877	5.32589	0.199354	44.8676	389.78	2.77	27.34	6.15	118.34
14	26	M	Asian	5.75726	2.75451	8.17611	8.38321	8.45726	13.0528	1.02791	7.73595	4.88798	9.22292	9.1553	0.293873	74.7237	512.07	3.14	37.64	4.17	90
15	29	M	African American	5.24442	0.947997	1.90894	13.385	7.43989	6.04478	1.75899	2.35804	27.9388	15.9607	3.96209	0.00907492	40.1057	370.9	2.31	24.5	3.93	98.14
16	33	M	White	9.7949	10.782	13.4849	22.8204	4.27182	3.19149	0.712209	1.76055	0.622924	13.7963	3.32725	0.0138463	43.6225	436.08	2.45	34.05	4.29	105.88
17	34	M	White	11.8125	2.47713	10.9096	13.3943	9.77391	16.676	1.83289	2.92174	2.19282	11.6975	2.6828	0.0287335	36.3053	348.1	2.47	33.46	4.5	123.7
18	40	M	White	5.44254	1.14881	12.4466	13.3933	7.44331	13.5317	1.41713	4.42784	1.18895	14.3367	3.42681	0.0446565	51.6483	373.59	1.59	28.63	4.5	87.29
19	45	M	White	6.63939	15.1587	11.4192	4.09729	5.01069	8.13648	2.73848	3.89472	0.418123	11.455	6.0438	0.0500972	57.5564	428.97	3.32	40.42	5.82	123
20	53	M	White	0.00444836	18.7965	3.58692	49.1419	2.26096	0.570246	0.830304	1.49739	0.504547	5.61486	4.03312	0.0477343	48.8477	402.33	2.6	32.38	3.89	101.56
21	56	M	Asian	3.74695	6.93994	16.2407	12.0467	1.30256	2.48997	3.22389	5.81929	6.43676	10.4257	7.82553	0.0808025	49.5	356.31	2.72	26.55	4.68	105.08
