# Supplementary material for: Mitochondrial phenotypes in purified human immune cell subtypes and cell mixtures
Source: eLife. 2021 Oct 26;10:e70899. doi: 10.7554/eLife.70899 (PMC8612706; doi:10.7554/eLife.70899)
Supplement: Figure 3—source data 1. — PBMC, peripheral blood mononuclear cell. [file elife-70899-fig3-data1.xlsx]

## Sheet: 3b
Data obtained from complete blood count (CBC)
Subject id	Age	Sex	Platelets (10^9/L)
1	23	F	278
2	23	F	260
3	25	F	355
4	27	F	322
5	32	F	272
6	32	F	157
7	40	F	286
8	41	F	257
9	43	F	199
10	52	F	285
11	57	F	210
12	24	M	299
13	25	M	200
14	26	M	223
15	29	M	207
16	33	M	220
17	34	M	223
18	40	M	185
19	45	M	259
20	53	M	106
21	56	M	264

## Sheet: 3c
Study	Ginevra Biino et. al 2013				Juan Zhang, Mingyong Li, Yuan He, 2015				Our cohort (Rausser et. al 2021)
Raw Values	Avg Age	Avg Platelets (10^9/L) in Men (n=18,936)	Avg Platelets (10^9/L) in Women (n=22,051)		Avg Age	Avg Platelets (10^9/L) in Men (n=22,351)	Avg Platelets (10^9/L) in Women (n=17,930)		Subject id	Age	Sex	Platelets (10^9/L)
	32	240	265		24	209	224		1	23	F	278
	42	242	267		36	197	206		2	23	F	260
	57	235	257		46	188	201		3	25	F	355
					56	183	190		4	27	F	322
									5	32	F	272
									6	32	F	157
									7	40	F	286
									8	41	F	257
									9	43	F	199
									10	52	F	285
									11	57	F	210
									12	24	M	299
									13	25	M	200
									14	26	M	223
									15	29	M	207
									16	33	M	220
									17	34	M	223
									18	40	M	185
									19	45	M	259
									20	53	M	106
									21	56	M	264
		Biino et. al 2013 (Men)	Biino et. al 2013 (Women)			Zhang et. al 2015 (Men)	Biino et. al 2013 (Women)					Rausser et.al 2021 (Women & Men)
Slope of regression		-0.2211	-0.3474			-0.825	-1.017					-1.597
y-intercept		248.7	278.2			227.7	246.4					299.1

## Sheet: 3d
Spearman's r correlations between platelet count and PBMCs mitochondrial activities, calculated in Prism 8 (GraphPad)
	Spearman's r	p value			Raw Data
CII	0.3806	0.0978			Subject id	Age	Sex	Ethnicity	Platelets (10^9/L)	PBMCs CS	PBMCs mtDNAcn	PBMCs CI	PBMCs CII	PBMCs CIV	PBMCs MHI
CS	0.3249	0.1622			1	23	F	Asian	278	47.6253	367.063	3.03303	26.8376	3.81006	104.737
mtDNAcn	0.1098	0.6449			2	23	F	Asian	260	49.5	356.308	2.72133	26.5499	4.68321	105.081
CI	0.06694	0.7792			3	25	F	Asian	355	NA	NA	NA	NA	NA	NA
CIV	0.03085	0.8973			4	27	F	White	322	51.9901	327.983	2.53719	31.6807	5.12614	112.705
MHI	-0.0331	0.8898			5	32	F	White	272	61.4562	470.179	3.75571	33.8493	5.48733	112.472
					6	32	F	White	157	48.9559	409.387	3.57653	30.8319	4.8695	119.455
					7	40	F	White	286	73.3951	529.612	3.10784	42.3964	4.75324	96.9036
					8	41	F	White	257	51.6483	373.588	1.5882	28.6326	4.49693	87.2861
					9	43	F	African American	199	40.1057	370.903	2.30836	24.5012	3.92907	98.1366
					10	52	F	White	285	74.7237	512.07	3.14119	37.6411	4.16766	89.9958
					11	57	F	Asian	210	48.8477	402.335	2.59517	32.3772	3.88514	101.56
					12	24	M	Asian	299	43.6225	436.076	2.45301	34.0547	4.29216	105.883
					13	25	M	White	200	55.1691	431.41	3.0405	38.872	5.07875	114.83
					14	26	M	Asian	223	48.0395	379.77	3.48923	31.7782	5.42734	127.239
					15	29	M	African American	207	28.2424	293.996	1.79232	20.7617	3.54798	100.477
					16	33	M	White	220	76.9139	435.376	3.36446	39.5764	4.50742	98.8829
					17	34	M	White	223	94.8099	529.991	4.01829	55.2524	6.34958	111.465
					18	40	M	White	185	36.2258	380.194	0.41	15.4287	3.15099	48.7724
					19	45	M	White	259	57.5564	428.966	3.31923	40.4208	5.82281	123.002
					20	53	M	White	106	44.8676	389.777	2.76502	27.3409	6.14504	118.338
					21	56	M	Asian	264	36.3053	348.102	2.4703	33.4566	4.49618	123.701

## Sheet: 3f
	Log 2 fold change relative to PBMCs (calculated in Prism (Graphpad 8))
*Values plotted	CS				mtDNAcn				CI				CII				CIV				MHI
	Total PBMCs	Platelet-depleted PBMCs	Enriched platelets		Total PBMCs	Platelet-depleted PBMCs	Enriched platelets		Total PBMCs	Platelet-depleted PBMCs	Enriched platelets		Total PBMCs	Platelet-depleted PBMCs	Enriched platelets		Total PBMCs	Platelet-depleted PBMCs	Enriched platelets		Total PBMCs	Platelet-depleted PBMCs	Enriched platelets
	0.356144	0.0285692	1.52105		0.0840643	-0.473931	0.782409		0.0285692	0.432959	1.0072		0.15056	0.422233	0.594549		0.0703893	0.505891	1.48027		-0.120294	0.659925	-0.152003
	0.422233	-1	0.516015		0.0143553	-0.217591	0.275007		0.333424	-1.51457	0.137504		0.0285692	-0.785875	0.411426		0.400538	-0.666576	0.545968		0.0426443	-0.415037	-0.0439433
	-0.268817	-0.234465	0.555816		-0.0291463	-0.0291463	0		-0.286304	-0.304006	-0.836501		-0.200913	-0.152003	-0.200913		-0.217591	0.124328	0.807355		-0.104697	0	-0.234465
	0.124328	-0.713119	0.910733		0.333424	-0.473931	-0.136062		0.333424	-1.08927	0.367371		0.0426443	-0.68966	-0.0291463		0.111031	-0.621488	0.790772		-0.0439433	-0.268817	-0.0144996
	-0.535332	0.0703893	1.18269		-0.321928	-0.0291463	0.400538		-0.217591	-0.358454	0.650765		-0.473931	-0.152003	0.411426		-0.434403	0.111031	1.20789		0.0565835	-0.168123	-0.0144996
	-0.152003	-0.217591	1.58496		0.0703893	-0.200913	0.443607		-0.0892673	-0.304006	0.790772		-0.104697	-0.217591	0.604071		-0.104697	0.0426443	1.36737		-0.0740006	0.0285692	-0.104697
	0.0143553	-0.168123	0.555816		0.111031	-0.120294	-0.0291463		0.124328	-0.321928	-0.321928		0.454176	-0.234465	-0.915936		0.0426443	-0.0439433	0.757023		0.15056	-0.0740006	-0.415037
	-0.120294	-0.286304	0.226509		-0.286304	-0.0588937	0.495695		-0.120294	-0.556393	0.263034		-0.168123	0.238787	1.09761		0.0840643	0.0285692	0.879706		0.0840643	0.124328	0.443607
	-0.0740006	-0.152003	0.956057		-0.0740006	0.0565835	0.526069		-0.268817	0.0426443	-0.304006		0.0840643	-0.0892673	1.40054		-0.0892673	0.201634	0.895303		-0.0144996	0.0703893	0.111031
	Fold change relative to PBMCs
	CS				mtDNAcn				CI				CII				CIV				MHI
	Total PBMCs	Platelet-depleted PBMCs	Enriched platelets		Total PBMCs	Platelet-depleted PBMCs	Enriched platelets		Total PBMCs	Platelet-depleted PBMCs	Enriched platelets		Total PBMCs	Platelet-depleted PBMCs	Enriched platelets		Total PBMCs	Platelet-depleted PBMCs	Enriched platelets		Total PBMCs	Platelet-depleted PBMCs	Enriched platelets
	1.27621	1.01643	2.87498		1.05907	0.719627	1.71919		1.01667	1.34754	2.01311		1.11314	1.33767	1.50872		1.05249	1.42443	2.79237		0.91541	1.57512	0.895599
	1.33815	0.495857	1.43084		1.00618	0.864144	1.20687		1.26	0.346561	1.10317		1.01732	0.577226	1.33495		1.31923	0.630938	1.45554		1.03357	0.747923	0.967213
	0.825982	0.852349	1.47476		0.977402	0.978255	0.998048		0.816667	0.812245	0.559184		0.870361	0.898407	0.87469		0.858061	1.08989	1.74719		0.931232	0.995807	0.848889
	1.08532	0.608039	1.87875		1.26255	0.72089	0.911527		1.25667	0.474801	1.29443		1.02595	0.617417	0.977477		1.07981	0.647321	1.73214		0.967385	0.826548	0.988718
	0.688841	1.04969	2.27362		0.801513	0.979677	1.31992		0.863333	0.776062	1.57143		0.724634	0.90051	1.33291		0.743974	1.08423	2.30886		1.04114	0.890855	0.990073
	0.90335	0.864995	3.00107		1.04604	0.86751	1.36024		0.943333	0.809187	1.73498		0.934445	0.855918	1.51929		0.927156	1.02946	2.58059		0.952972	1.02399	0.931478
	1.01181	0.889948	1.46903		1.08183	0.919659	0.977909		1.09	0.798165	0.798165		1.36978	0.852227	0.532614		1.02517	0.967085	1.68652		1.1107	0.95128	0.751573
	0.921668	0.820868	1.16789		0.817384	0.96242	1.414		0.923333	0.67509	1.19856		0.888847	1.17782	2.14142		1.0557	1.01674	1.84018		1.05855	1.0941	1.36305
	0.948662	0.904726	1.94258		0.94804	1.04192	1.44378		0.83	1.02811	0.807229		1.05553	0.94425	2.63806		0.938404	1.14555	1.85616		0.98904	1.0494	1.08399
Avg	1	0.833655	1.94595		1	0.894901	1.26128		1	0.785307	1.23114		1	0.906827	1.4289		1	1.00396	1.99995		1	1.01722	0.980065
% change		-0.166345	0.945945			-0.105099	0.261276			-0.214693	0.23114			-0.0931732	0.428903			0.00396064	0.99995			0.0172242	-0.0199351
	Raw Values
	CS				mtDNAcn				CI				CII				CIV				MHI
	Total PBMCs	Platelet-depleted PBMCs	Enriched platelets		Total PBMCs	Platelet-depleted PBMCs	Enriched platelets		Total PBMCs	Platelet-depleted PBMCs	Enriched platelets		Total PBMCs	Platelet-depleted PBMCs	Enriched platelets		Total PBMCs	Platelet-depleted PBMCs	Enriched platelets		Total PBMCs	Platelet-depleted PBMCs	Enriched platelets
	52.95	53.82	152.23		294.231	211.736	505.84		3.05	4.11	6.14		36.13	48.33	54.51		6.55	9.33	18.29		145.897	229.804	130.665
	55.52	27.53	79.44		279.537	241.56	337.364		3.78	1.31	4.17		33.02	19.06	44.08		8.21	5.18	11.95		164.729	123.204	159.328
	34.27	29.21	50.54		271.543	265.638	271.013		2.45	1.99	1.37		28.25	25.38	24.71		5.34	5.82	9.33		148.418	147.796	125.991
	45.03	27.38	84.6		350.764	252.862	319.731		3.77	1.79	4.88		33.3	20.56	32.55		6.72	4.35	11.64		154.18	127.437	152.441
	28.58	30	64.98		222.677	218.152	293.916		2.59	2.01	4.07		23.52	21.18	31.35		4.63	5.02	10.69		165.935	147.824	164.288
	37.48	32.42	112.48		290.611	252.108	395.302		2.83	2.29	4.91		30.33	25.96	46.08		5.77	5.94	14.89		151.883	155.526	141.476
	41.98	37.36	61.67		300.556	276.409	293.916		3.27	2.61	2.61		44.46	37.89	23.68		6.38	6.17	10.76		177.022	168.397	133.045
	38.24	31.39	44.66		227.087	218.553	321.1		2.77	1.87	3.32		28.85	33.98	61.78		6.57	6.68	12.09		168.711	184.586	229.961
	39.36	35.61	76.46		263.386	274.428	380.27		2.49	2.56	2.01		34.26	32.35	90.38		5.84	6.69	10.84		157.632	165.419	170.872
Avg	41.49	33.8578	80.7844		277.821	245.716	346.495		3	2.28222	3.72		32.4578	29.41	45.4578		6.22333	6.13111	12.2756		159.378	161.111	156.452

## Sheet: 3g
*For calculations see source data for Figure 3f
	Percent change (%) of platelet-depleted PBMCs from total PBMCs
CS	-16.6
mtDNAcn	-10.5
CI	-21.5
CII	-9.3
CIV	0.4
MHI	1.7
