# Supplementary material for: Mitochondrial phenotypes in purified human immune cell subtypes and cell mixtures
Source: eLife. 2021 Oct 26;10:e70899. doi: 10.7554/eLife.70899 (PMC8612706; doi:10.7554/eLife.70899)
Supplement: Figure 4—figure supplement 1—source data 1. — PBMC, peripheral blood mononuclear cell. [file elife-70899-fig4-figsupp1-data1.xlsx]

## Sheet: Fig 4-fig supp. 1
Spearman's r correlations between cell type enzymatic activity and PBMCs enzymatic activity, calculated in Prism 8 (GraphPad). For raw values see source data for Figure 4a-e and Appendix 2-figure 1b.
		PBMCs enzymatic activity
		CS	mtDNAcn	CI	CII	CIV	MHI
Cell type enzymatic activity	B cells	0.2727	0.2867	-0.05594	0.5594	-0.06305	0.5664
	Neutrophils	0.6	0.07273	0.5467	0.1636	-0.04545	0.3091
	Natural killers	0.489	0.2802	0.1871	0.1593	-0.2944	0.1703
	Monocytes	0.777	0.5	0.07843	0.2941	0.4289	0.2745
	CD8+ naïve	0.4336	0.2098	0.3993	0.6853	0.1329	0.05594
	CD4+ naïve	0.676	0.4915	0.1455	0.4799	0.3664	0.3849
	CD8+ CM & EM	0.3516	0.2806	-0.1044	-0.05495	0.3054	0.3462
	CD4+ CM & EM	0.5429	0.4496	0.1001	0.1293	0.1429	0.1594
