# Supplementary material for: Mitochondrial phenotypes in purified human immune cell subtypes and cell mixtures
Source: eLife. 2021 Oct 26;10:e70899. doi: 10.7554/eLife.70899 (PMC8612706; doi:10.7554/eLife.70899)
Supplement: Figure 4—source data 1. — RC, respiratory chain. [file elife-70899-fig4-data1.xlsx]

## Sheet: 4a
				CS activity
Subject id	Age	Sex	Ethnicity	B cells	Neutrophils	Natural killers	Monocytes	CD8+ naïve	CD4+ naïve	CD8+ CM & EM	CD4+ CM & EM	PBMCs
1	23	F	Asian	40.2926	NA	NA	41.8749	29.141	27.0296	23.5536	27.3244	47.6253
2	23	F	Asian	NA	23.0678	NA	37.3941	24.6856	21.9791	26.0536	28.8535	49.5
3	25	F	Asian	NA	23.5823	17.6288	32.5379	NA	NA	NA	NA	NA
4	27	F	White	NA	27.2894	NA	46.838	24.9918	22.3108	33.2006	35.4684	51.9901
5	32	F	White	37.8307	NA	NA	43.5952	36.4775	25.538	32.0168	40.1959	61.4562
6	32	F	White	NA	26.091	37.4198	48.3805	24.827	25.8697	NA	40.5841	48.9559
7	40	F	White	32.7214	25.3918	NA	40.7169	NA	17.8464	22.8057	24.3012	73.3951
8	41	F	White	32.4539	NA	23.091	NA	22.2936	21.2072	34.2938	28.9093	51.6483
9	43	F	African American	NA	22.1192	23.5635	37.8181	NA	19.7899	27.3113	30.2595	40.1057
10	52	F	White	39.8968	NA	29.2962	49.5247	29.2217	26.0095	NA	33.3913	74.7237
11	57	F	Asian	26.2607	22.8128	25.1724	40.4874	NA	22.6235	NA	34.6785	48.8477
12	24	M	Asian	NA	NA	19.6937	32.417	24.959	17.7774	22.9006	20.1964	43.6225
13	25	M	White	35.0824	26.0819	NA	42.36	NA	24.3543	26.6385	31.172	55.1691
14	26	M	Asian	NA	NA	21.2218	36.6507	19.3857	15.3905	18.963	24.5321	48.0395
15	29	M	African American	NA	NA	NA	29.1004	17.9874	14.7107	21.5201	21.6879	28.2424
16	33	M	White	34.1142	26.6469	29.5726	46.7986	NA	28.3526	NA	40.4046	76.9139
17	34	M	White	39.3436	NA	27.4426	42.7172	27.9846	27.236	NA	31.4952	94.8099
18	40	M	White	36.6878	NA	26.6866	NA	28.343	17.7529	NA	28.8833	36.2258
19	45	M	White	34.518	20.1067	23.0669	NA	NA	23.4023	21.7337	26.5424	57.5564
20	53	M	White	NA	16.5866	23.1307	32.2113	NA	NA	NA	25.4639	44.8676
21	56	M	Asian	22.4725	17.7987	20.1438	26.8447	NA	NA	20.9049	21.8931	36.3053

## Sheet: 4b
				mtDNAcn
Subject id	Age	Sex	Ethnicity	B cells	Neutrophils	Natural killers	Monocytes	CD8+ naïve	CD4+ naïve	CD8+ CM & EM	CD4+ CM & EM	PBMCs
1	23	F	Asian	351.432	NA	NA	274.285	444.046	274.559	273.957	311.26	367.063
2	23	F	Asian	NA	116.471	NA	287.542	490.179	317.916	290.742	322.472	356.308
3	25	F	Asian	NA	103.956	155.241	247.84	NA	NA	NA	NA	NA
4	27	F	White	NA	115.131	NA	227.202	292.307	215.585	209.278	249.344	327.983
5	32	F	White	410.008	NA	NA	322.931	391.235	304.527	370.793	311.956	470.179
6	32	F	White	NA	133.396	153.906	245.509	338.898	297.091	NA	341.659	409.387
7	40	F	White	526.811	117.565	NA	317.331	NA	360.707	386.835	348.362	529.612
8	41	F	White	509.369	NA	188.295	NA	462.578	352.695	377.531	381.692	373.588
9	43	F	African American	NA	118.912	245.375	311.634	NA	367.946	316.587	324.995	370.903
10	52	F	White	550.377	NA	273.041	335.111	565.766	404.895	NA	382.783	512.07
11	57	F	Asian	475.339	143.612	236.244	334.462	NA	387.101	NA	344.997	402.335
12	24	M	Asian	NA	NA	225.265	355.627	564.76	402.277	273.53	339.559	436.076
13	25	M	White	471.862	142.073	NA	290.791	NA	352.253	210.662	294.854	431.41
14	26	M	Asian	NA	NA	178.948	248.602	398.274	274.891	227.449	252.288	379.77
15	29	M	African American	NA	NA	NA	279.117	410.9	278.724	348.835	279.512	293.996
16	33	M	White	477.435	126.404	184.603	312.648	NA	324.055	NA	383.56	435.376
17	34	M	White	352.553	NA	198.484	302.017	415.888	315.722	NA	302.624	529.991
18	40	M	White	355.719	NA	140.153	NA	347.256	277.385	NA	276.048	380.194
19	45	M	White	512.927	104.516	193.359	NA	NA	356.546	340.013	316.776	428.966
20	53	M	White	NA	180.936	333.484	331.708	NA	NA	NA	427.992	389.777
21	56	M	Asian	421.577	133.589	165.858	318.391	NA	NA	277.43	265.266	348.102

## Sheet: 4c
				CI activity
Subject id	Age	Sex	Ethnicity	B cells	Neutrophils	Natural killers	Monocytes	CD8+ naïve	CD4+ naïve	CD8+ CM & EM	CD4+ CM & EM	PBMCs
1	23	F	Asian	1.61093	NA	NA	3.48414	2.11224	1.36532	1.63835	1.64668	3.03303
2	23	F	Asian	NA	1.01589	NA	2.45506	1.51912	1.18559	1.34992	1.6776	2.72133
3	25	F	Asian	NA	0.841711	1.55978	2.71951	NA	NA	NA	NA	NA
4	27	F	White	NA	0.815662	NA	3.67197	1.69052	1.40236	1.96018	1.68278	2.53719
5	32	F	White	1.27481	NA	NA	3.68074	1.97395	1.30946	1.60449	2.54118	3.75571
6	32	F	White	NA	1.28412	1.38255	3.38236	1.83837	1.49078	NA	1.54531	3.57653
7	40	F	White	1.31446	0.708782	NA	2.80059	NA	1.15728	1.6484	1.47704	3.10784
8	41	F	White	1.20752	NA	1.23657	NA	1.59519	1.14137	1.75467	1.47016	1.5882
9	43	F	African American	NA	0.457711	1.81794	3.61614	NA	1.45642	1.62391	1.69355	2.30836
10	52	F	White	1.4107	NA	1.50281	2.93926	1.52398	1.54834	NA	1.59205	3.14119
11	57	F	Asian	1.53262	1.41112	1.42094	2.56198	NA	1.70269	NA	1.84144	2.59517
12	24	M	Asian	NA	NA	1.52665	2.52376	1.8529	1.32073	1.68974	1.37133	2.45301
13	25	M	White	1.43758	0.735324	NA	3.14674	NA	1.61455	1.57961	2.11495	3.0405
14	26	M	Asian	NA	NA	1.64804	1.7398	1.25304	0.872585	0.936988	1.45951	3.48923
15	29	M	African American	NA	NA	NA	2.75556	1.19353	1.44539	0.33623	1.83724	1.79232
16	33	M	White	1.17845	1.37887	1.37278	2.49309	NA	1.21426	NA	1.88584	3.36446
17	34	M	White	1.47683	NA	2.53447	2.69656	2.2358	1.82919	NA	1.87494	4.01829
18	40	M	White	1.32179	NA	1.56212	NA	1.75325	1.35573	NA	1.91532	0.41
19	45	M	White	1.52313	1.20102	1.9084	NA	NA	1.56218	2.06671	1.65426	3.31923
20	53	M	White	NA	1.08905	1.56477	2.25951	NA	NA	NA	1.43178	2.76502
21	56	M	Asian	1.42347	0.707149	1.48699	2.25451	NA	NA	1.83696	1.5714	2.4703

## Sheet: 4d
				CII activity
Subject id	Age	Sex	Ethnicity	B cells	Neutrophils	Natural killers	Monocytes	CD8+ naïve	CD4+ naïve	CD8+ CM & EM	CD4+ CM & EM	PBMCs
1	23	F	Asian	17.2831	NA	NA	22.3216	16.8484	15.7717	9.61569	11.5594	26.8376
2	23	F	Asian	NA	11.7504	NA	25.1509	19.2461	18.6351	20.2969	21.1362	26.5499
3	25	F	Asian	NA	9.79585	14.7708	26.1505	NA	NA	NA	NA	NA
4	27	F	White	NA	9.47802	NA	25.3628	15.9858	14.2687	20.5619	18.3195	31.6807
5	32	F	White	18.0231	NA	NA	30.7961	20.3051	21.6869	21.2419	25.154	33.8493
6	32	F	White	NA	12.2184	24.8977	31.2135	19.3022	18.3563	NA	24.6908	30.8319
7	40	F	White	21.3554	14.4912	NA	28.1434	NA	16.86	24.8392	20.9486	42.3964
8	41	F	White	14.9915	NA	20.0467	NA	20.275	16.8485	28.8538	23.6468	28.6326
9	43	F	African American	NA	9.80153	24.2963	26.7947	NA	17.9396	24.105	23.4443	24.5012
10	52	F	White	23.3547	NA	24.0482	33.2461	24.3008	23.8639	NA	26.4302	37.6411
11	57	F	Asian	13.8057	13.2651	22.0504	22.8314	NA	17.1502	NA	23.3796	32.3772
12	24	M	Asian	NA	NA	24.5834	33.0721	28.2076	20.4471	19.622	19.5224	34.0547
13	25	M	White	20.2486	9.12545	NA	29.9801	NA	19.1743	15.5911	19.5561	38.872
14	26	M	Asian	NA	NA	20.499	25.7405	14.159	11.713	20.2532	16.647	31.7782
15	29	M	African American	NA	NA	NA	27.247	13.9385	15.4013	22.4549	19.5914	20.7617
16	33	M	White	15.2366	9.66853	14.8983	21.3443	NA	12.76	NA	26.1868	39.5764
17	34	M	White	15.6274	NA	23.2166	26.8519	22.0578	22.4	NA	17.9006	55.2524
18	40	M	White	11.2625	NA	19.5549	NA	16.4207	12.7435	NA	19.6647	15.4287
19	45	M	White	23.6498	10.9839	21.402	NA	NA	21.2877	21.3365	23.0023	40.4208
20	53	M	White	NA	10.2048	12.9876	21.9778	NA	NA	NA	20.4154	27.3409
21	56	M	Asian	19.4788	12.504	23.4664	27.2154	NA	NA	27.8228	25.5879	33.4566

## Sheet: 4e
				CIV activity
Subject id	Age	Sex	Ethnicity	B cells	Neutrophils	Natural killers	Monocytes	CD8+ naïve	CD4+ naïve	CD8+ CM & EM	CD4+ CM & EM	PBMCs
1	23	F	Asian	0.174371	NA	NA	3.91391	2.8198	2.03756	1.58188	2.17304	3.81006
2	23	F	Asian	NA	2.72305	NA	4.90799	3.49499	3.13203	3.21055	4.20004	4.68321
3	25	F	Asian	NA	9.49407	4.2096	5.29523	NA	NA	NA	NA	NA
4	27	F	White	NA	2.19556	NA	5.68464	2.74674	2.57128	4.43153	2.82041	5.12614
5	32	F	White	5.42429	NA	NA	5.3428	7.1961	5.26343	4.68192	6.3619	5.48733
6	32	F	White	NA	3.59952	3.29601	6.24778	1.37679	3.56454	NA	5.41232	4.8695
7	40	F	White	3.1408	3.25987	NA	3.60348	NA	2.58817	4.07627	3.38924	4.75324
8	41	F	White	4.74015	NA	3.21519	NA	2.50465	4.18931	4.54748	3.59149	4.49693
9	43	F	African American	NA	3.80079	4.27322	5.26556	NA	3.20728	3.97514	3.25915	3.92907
10	52	F	White	3.42323	NA	4.70465	5.29583	3.54351	2.84683	NA	1.98248	4.16766
11	57	F	Asian	4.85539	2.94798	2.23371	5.58193	NA	4.49109	NA	2.37404	3.88514
12	24	M	Asian	NA	NA	3.10598	4.73875	2.70498	2.56201	4.4655	2.89178	4.29216
13	25	M	White	6.17454	3.80599	NA	6.11787	NA	3.50102	2.74853	3.24907	5.07875
14	26	M	Asian	NA	NA	2.06268	5.84928	3.16497	3.88773	3.79131	2.61984	5.42734
15	29	M	African American	NA	NA	NA	4.77432	3.447	3.36163	3.19278	3.41408	3.54798
16	33	M	White	3.22234	1.78469	2.17446	3.8093	NA	1.64409	NA	3.6361	4.50742
17	34	M	White	3.00312	NA	3.04039	6.42108	4.22071	3.85264	NA	2.59699	6.34958
18	40	M	White	5.69487	NA	3.3966	NA	3.74868	2.36367	NA	3.49986	3.15099
19	45	M	White	4.71069	3.1077	4.63575	NA	NA	3.16301	3.36192	4.04662	5.82281
20	53	M	White	NA	2.7998	2.47491	4.42192	NA	NA	NA	2.72272	6.14504
21	56	M	Asian	4.5588	2.87326	3.47822	4.02013	NA	NA	2.91807	3.88754	4.49618

## Sheet: 4f
Inter-correlations between mitochondrial features across cell subtypes, Spearman's r calculated in Prism 8 (GraphPad).
CS and mtDNAcn correlations				CI and CII correlations				CI and CIV correlations				CII and CIV correlations
	Spearman's r	p value			Spearman's r	p value			Spearman's r	p value			Spearman's r	p value
PBMCs	0.682707	0.000909909		PBMC	0.637594	0.00249284		PBMC	0.678451	0.00100792		PBMC	0.522753	0.0180373
CD4+ CM & EM	0.196992	0.405152		CD8+ Naive	0.507882	0.0944538		CD8+ CM & EM	0.252747	0.404311		CD4+ CM & EM	0.482707	0.0311052
Natural killers	0.059341	0.843781		CD4+ Naive	0.50258	0.0335305		Monocytes	0.241611	0.334099		CD8+ CM & EM	0.32967	0.271474
CD8+ CM & EM	0.057772	0.852588		Monocytes	0.337461	0.170838		Natural killers	0.200885	0.49059		Natural killers	0.305495	0.28778
CD4+ Naive	0.054724	0.829248		CD8+ CM & EM	0.318681	0.28857		CD4+ CM & EM	0.172375	0.467401		CD4+ Naive	0.283798	0.253756
CD8+ Naive	0.013986	0.973891		B cells	0.153846	0.635329		CD4+ Naive	0.168215	0.504633		Monocytes	0.269489	0.279506
Monocytes	-0.135191	0.59275		Neutrophils	0.108772	0.734758		CD8+ Naive	0.122592	0.703619		CD8+ Naive	0.090909	0.782983
Neutrophils	-0.265734	0.404188		CD4+ CM & EM	0.079789	0.738088		B cells	-0.160839	0.619183		Neutrophils	0	1
B cells	-0.356643	0.255964		Natural killers	-0.024283	0.939363		Neutrophils	-0.346761	0.267818		B cells	-0.188811	0.557684
