# Supplementary material for: Mitochondrial phenotypes in purified human immune cell subtypes and cell mixtures
Source: eLife. 2021 Oct 26;10:e70899. doi: 10.7554/eLife.70899 (PMC8612706; doi:10.7554/eLife.70899)
Supplement: Figure 5—source data 1. [file elife-70899-fig5-data1.xlsx]

## Sheet: 5a
*Effect sizes calculated using https://www.cem.org/effect-size-calculator excel template
*Fold change values highlighted in green are negatively adjusted for the higher mean value in men compared to women
*For raw values see Figure 4 source data
	CS activity
	Women			Men
	mean	n	SD	mean	n	SD	Hedges' g	Upper 95% C.I.	Lower 95% C.I.	Fold change (Women/Men)
CD8+ CM & EM	28.4622	7	4.69595	22.1101	6	2.56818	1.52395	2.76176	0.28615	1.49065
Monocytes	41.9168	10	5.32707	36.1375	8	7.18201	0.886648	1.86041	-0.0871154	1.87721
CD4+ CM & EM	32.3966	10	5.41646	27.2271	10	6.05138	0.86211	1.77844	-0.0542246	1.84622
Neutrophils	24.3363	7	1.92909	21.4441	5	4.67042	0.80625	1.99836	-0.385857	3.62866
CD8+ naïve	27.3769	7	4.73655	23.732	5	4.81513	0.705422	1.88725	-0.476408	1.47787
CD4+ naïve	23.0204	10	3.01303	21.1221	8	5.36927	0.429449	1.36967	-0.510768	3.31892
Natural killers	26.0286	6	6.72953	23.8698	8	3.63999	0.389278	1.45756	-0.678999	0.891592
B cells	34.9094	6	5.44066	33.7031	6	5.82383	0.197528	1.33187	-0.936814	1.10281
PBMCs	54.8248	10	11.4014	52.1752	10	20.2493	0.154423	1.03225	-0.723405	0.877084

## Sheet: 5b
*Effect sizes calculated using https://www.cem.org/effect-size-calculator excel template
*Fold change values highlighted in green are negatively adjusted for the higher mean value in men compared to women
*For raw values see Figure 4 source data
	mtDNAcn
	Women			Men
	mean	n	SD	mean	n	SD	Hedges' g	Upper 95% C.I.	Lower 95% C.I.	Fold change (Women/Men)
CD8+ CM & EM	317.96	7	65.287	279.653	6	56.4921	0.579792	1.69276	-0.533173	1.13698
B cells	470.556	6	76.0553	432.012	6	66.9954	0.496286	1.64516	-0.652587	1.08922
CD4+ CM & EM	331.952	10	38.5601	313.848	10	55.5804	0.362466	1.24616	-0.521225	1.05768
Natural killers	208.684	6	50.0403	202.519	8	58.4071	0.104096	1.1633	-0.955108	1.03044
CD4+ naïve	328.302	10	57.5242	322.732	8	45.7867	0.10064	1.03091	-0.829634	1.01726
PBMCs	411.943	10	68.8604	405.366	10	63.0913	0.0953831	0.972404	-0.781638	1.01623
CD8+ naïve	426.43	7	93.0815	427.416	5	81.4617	-0.0102641	1.13738	-1.15791	-0.997694
Monocytes	290.385	10	39.8097	304.863	8	32.8971	-0.373188	0.564463	-1.31084	-0.95251
Neutrophils	121.292	7	13.0765	137.504	5	27.991	-0.733491	0.45107	-1.91805	-0.882099

## Sheet: 5c
*Effect sizes calculated using https://www.cem.org/effect-size-calculator excel template
*Fold change values highlighted in green are negatively adjusted for the higher mean value in men compared to women
*For raw values see Figure 4 source data
	CI
	Women			Men
	mean	n	SD	mean	n	SD	Hedges' g	Upper 95% C.I.	Lower 95% C.I.	Fold change (Women/Men)
Monocytes	3.13118	10	0.484659	2.48369	8	0.416914	1.35142	2.3806	0.322239	1.26069
CD8+ CM & EM	1.65428	7	0.182565	1.40771	6	0.647653	0.501781	1.60913	-0.605569	1.17516
CD8+ naïve	1.75048	7	0.231328	1.6577	5	0.436072	0.260312	1.41266	-0.892041	1.05597
PBMCs	2.83645	10	0.6321	2.71	10	1.03	0.141721	1.02	-0.74	1.04666
CD4+ CM & EM	1.71678	10	0.310299	1.71166	10	0.248907	0.017443	0.893982	-0.859096	1.00299
B cells	1.39184	6	0.156097	1.39354	6	0.124881	-0.0111141	1.12048	-1.14271	-0.998778
CD4+ naïve	1.37596	10	0.182712	1.40183	8	0.28772	-0.10504	0.825285	-1.03537	-0.981548
Neutrophils	0.933571	7	0.330915	1.02228	5	0.293775	-0.258588	0.893703	-1.41088	-0.913221
Natural killers	1.48677	6	0.196499	1.70053	8	0.370764	-0.640698	0.44408	-1.72548	-0.874296

## Sheet: 5d
*Effect sizes calculated using https://www.cem.org/effect-size-calculator excel template
*Fold change values highlighted in green are negatively adjusted for the higher mean value in men compared to women
*For raw values see Figure 4 source data
	CII
	Women			Men
	mean	n	SD	mean	n	SD	Hedges' g	Upper 95% C.I.	Lower 95% C.I.	Fold change (Women/Men)
Neutrophils	11.5429	7	1.93674	10.4973	5	1.31509	0.562503	1.732	-0.606991	1.09961
Natural killers	21.685	6	3.83012	20.076	8	4.15653	0.371885	1.43931	-0.695541	1.08015
CD4+ naïve	18.1381	10	2.79996	16.9909	8	4.322	0.30799	1.24311	-0.627131	1.06752
CD4+ CM & EM	21.8709	10	4.31734	20.8075	10	3.1362	0.269921	1.15043	-0.610584	1.05111
Monocytes	27.2011	10	3.62414	26.6786	8	3.8517	0.133551	1.06427	-0.797164	1.01958
B cells	18.1356	6	3.66002	17.584	6	4.39966	0.12579	1.25849	-1.00691	1.03137
CD8+ naïve	19.4662	7	2.70101	18.9567	5	6.12021	0.10685	1.25528	-1.04158	1.02688
CD8+ CM & EM	21.3592	7	5.99314	21.1801	6	4.00748	0.0321241	1.12262	-1.05837	1.00846
PBMCs	31.5298	10	5.44314	33.6942	10	11.1381	-0.236471	0.643109	-1.11605	-0.935762

## Sheet: 5e
*Effect sizes calculated using https://www.cem.org/effect-size-calculator excel template
*Fold change values highlighted in green are negatively adjusted for the higher mean value in men compared to women
*For raw values see Figure 4 source data
	CIV
	Women			Men
	mean	n	SD	mean	n	SD	Hedges' g	Upper 95% C.I.	Lower 95% C.I.	Fold change (Women/Men)
Natural killers	3.6554	6	0.909275	3.04612	8	0.836089	0.653297	1.7391	-0.432512	1.20002
Neutrophils	4.00298	7	2.48079	2.87429	5	0.727208	0.527133	1.69399	-0.639721	1.39268
CD8+ CM & EM	3.7864	7	1.08847	3.41302	6	0.630627	0.381838	1.48209	-0.718419	1.1094
CD4+ naïve	3.38915	10	0.996036	3.04197	8	0.787815	0.362989	1.30021	-0.574235	1.11413
CD4+ CM & EM	3.55641	10	1.42118	3.25646	10	0.527988	0.267961	1.14841	-0.612486	1.09211
Monocytes	5.11392	10	0.798302	5.01908	8	0.986968	0.101954	1.03224	-0.828335	1.01889
CD8+ naïve	3.38322	7	1.83014	3.45727	5	0.57429	-0.0466912	1.1011	-1.19448	-0.978583
PBMCs	4.52083	10	0.566397	4.88183	10	1.07411	-0.402648	0.482712	-1.28801	-0.926053
B cells	3.62637	6	1.90667	4.56073	6	1.27519	-0.531593	0.619805	-1.68299	-0.795131

## Sheet: 5f
*Effect sizes calculated using https://www.cem.org/effect-size-calculator excel template
*Fold change values highlighted in green are negatively adjusted for the higher mean value in men compared to women
*For raw values see Appendix 2-figure 1 source data
	MHI
	Women			Men
	mean	n	SD	mean	n	SD	Hedges' g	Upper 95% C.I.	Lower 95% C.I.	Fold change (Women/Men)
Neutrophils	97.3435	7	31.5494	82.8746	5	13.2091	0.516982	1.68311	-0.649144	1.17459
Monocytes	131.574	10	13.3241	124.629	8	15.9638	0.45496	1.39646	-0.486536	1.05573
CD4+ naïve	88.1568	10	10.499	86.3414	8	14.9088	0.136995	1.06776	-0.793774	1.02103
Natural killers	111.155	6	14.099	110.835	8	23.4303	0.014839	1.07335	-1.04368	1.00289
CD8+ naïve	83.9203	7	13.6327	84.9355	5	11.6866	-0.0726853	1.07532	-1.22069	-0.988047
CD4+ CM & EM	91.3066	10	16.732	94.4985	10	12.4567	-0.207241	0.671631	-1.08611	-0.966223
CD8+ CM & EM	97.5453	7	15.9971	101.394	6	16.9277	-0.217917	0.875718	-1.31155	-0.962038
PBMCs	102.833	10	10.2235	107.259	10	22.7398	-0.240426	0.639258	-1.12011	-0.958737
B cells	69.9452	6	12.0077	79.8206	6	13.0798	-0.725838	0.442414	-1.89409	-0.87628

## Sheet: 5g
Spearman's r correlations between cell type CS activity and age, calculated in Prism 8 (GraphPad).
*For raw values see Figure 4 source data
	Spearman's r	p value
CD8+ naïve	0.2491	0.4316
NK cells	0.1604	0.5838
CD4+ naïve	0.07855	0.7567
CD4+ CM & EM	0.06699	0.779
Monocytes	0.01964	0.9384
PBMCs	0.00828	0.9724
CD8+ CM & EM	-0.08528	0.7818
B cells	-0.5814	0.0507
Neutrophils	-0.6305	0.0313

## Sheet: 5h
Spearman's r correlations between cell type mtDNAcn and age, calculated in Prism 8 (GraphPad).
*For raw values see Figure 4 source data
	Spearman's r	p value
CD4+ naïve	0.5372	0.0215
Monocytes	0.5313	0.0233
CD8+ CM & EM	0.5055	0.0797
B cells	0.5044	0.0968
Neutrophils	0.4939	0.105
NK cells	0.4549	0.1044
CD4+ CM & EM	0.3779	0.1005
PBMCs	0.146	0.539
CD8+ naïve	-0.03509	0.9164

## Sheet: 5i
Spearman's r correlations between cell type CI activity and age, calculated in Prism 8 (GraphPad).
*For raw values see Figure 4 source data
	Spearman's r	p value
CD8+ CM & EM	0.4787	0.0997
CD4+ naïve	0.3328	0.1772
Neutrophils	0.1333	0.6768
B cells	0.08757	0.7876
CD8+ naïve	-0.02988	0.9272
CD4+ CM & EM	-0.08515	0.7211
NK cells	-0.08609	0.7723
PBMCs	-0.1122	0.6378
Monocytes	-0.1323	0.6008

## Sheet: 5j
Spearman's r correlations between cell type CII activity and age, calculated in Prism 8 (GraphPad).
*For raw values see Figure 4 source data
	Spearman's r	p value
CD8+ CM & EM	0.8528	0.0004
CD4+ CM & EM	0.5713	0.0085
Neutrophils	0.4965	0.1019
CD8+ naïve	0.3123	0.3203
CD4+ naïve	0.1819	0.47
PBMCs	0.14	0.556
B cells	0.03152	0.9258
Monocytes	-0.002067	0.9935
NK cells	-0.02857	0.9276

[truncated: 2 more sheets: 5k, 5l]
