# Supplementary material for: Mitochondrial phenotypes in purified human immune cell subtypes and cell mixtures
Source: eLife. 2021 Oct 26;10:e70899. doi: 10.7554/eLife.70899 (PMC8612706; doi:10.7554/eLife.70899)
Supplement: Figure 6—figure supplement 1—source data 1. [file elife-70899-fig6-figsupp1-data1.xlsx]

## Sheet: a
Repeat participant	Cell type proportions (%)
Week	B cells (%)	Neutrophils (%)	Natural killers (%)	Monocytes (%)	CD8+ naïve (%)	CD4+ naïve (%)	CD8+ CM (%)	CD8+ EM (%)	CD8+ TEMRA (%)	CD4+ CM (%)	CD4+ EM (%)	CD4+ TEMRA (%)
1	1.56776	12.5255	11.7582	8.3798	6.69059	7.2371	0.96053	5.83494	3.87524	7.45791	6.78443	0.182169
2	1.42035	11.7065	10.0099	10.7017	6.7801	5.02086	0.354007	6.28093	2.74841	4.982	11.8118	0.616275
3	0.956655	31.8348	7.21272	7.90007	5.62295	6.47331	0.76105	3.97209	2.40917	4.88601	4.95806	0.271217
4	1.26725	26.0881	7.22502	2.43586	6.11604	5.69515	1.3544	4.10106	2.12393	10.1231	5.14926	0.0298175
5	1.14524	22.9266	9.38329	8.54627	6.29462	4.36717	1.12438	4.94877	2.49042	8.60008	5.91527	0.022856
6	1.44231	23.1933	9.03194	10.2845	6.50283	7.01814	1.13055	4.39486	3.03129	7.97185	4.85122	0.125949
7	1.76171	3.96868	10.8079	13.9527	9.65852	10.84	1.28584	4.59994	3.68013	10.051	5.60982	0.168424
8	1.80635	4.76483	5.65251	14.1805	11.3589	9.01946	1.40622	4.6868	2.2247	14.5258	8.08758	0.1003
9	0.857419	28.7137	5.81626	13.6213	5.21329	6.51965	1.02821	3.33792	1.69129	7.98322	4.85885	0.104902
rMSSD	0.424384	13.1941	2.38278	3.48705	2.55644	2.25246	0.374177	1.02718	0.767859	3.5957	3.37531	0.218783
rMSSD/avg	0.312429	0.716543	0.278877	0.348695	0.358168	0.325966	0.358057	0.219289	0.28469	0.422577	0.523519	1.21403
CV%	0.244743	0.564034	0.254612	0.376073	0.283067	0.288832	0.314357	0.195287	0.267282	0.343713	0.353429	1.0022

## Sheet: b
Repeat participant	CBC-derived cell type proportions
Week	Basophils (%)	Eosinophils (%)	Lymphocytes (%)	Monocytes (%)	Neutrophils (%)	Platelet (10^9/L)
1	0.6	3.8	26.7	6.9	61.8	256
2	0.7	4.5	24.7	5.9	63.7	252
3	0.4	3.8	25.2	6.5	64.1	232
4	0.4	5	27.7	6.6	59.7	240
5	0.4	4.2	21.9	5.3	67.5	228
6	0.4	5.3	25.3	6.1	62.7	242
7	0.4	6.3	31.1	7.8	54	231
8	0.4	5.4	37.4	7.9	48.5	244
9	0.5	3.8	21	6.4	67.9	242
rMSSD	0.11726	1.03923	7.05328	1.05178	8.58276	11.8004
rMSSD/avg	0.251272	0.222163	0.2634	0.159361	0.140471	0.0490096
CV%	0.239579	0.188432	0.186037	0.127894	0.103048	0.0390588
