# Supplementary material for: Mitochondrial phenotypes in purified human immune cell subtypes and cell mixtures
Source: eLife. 2021 Oct 26;10:e70899. doi: 10.7554/eLife.70899 (PMC8612706; doi:10.7554/eLife.70899)
Supplement: Figure 6—figure supplement 2—source data 1. — CBC, complete blood count; PBMC, peripheral blood mononuclear cell. [file elife-70899-fig6-figsupp2-data1.xlsx]

## Sheet: a
* Spearman's r correlations between cell type proportion and PBMCs enzymatic activity in the repeat participant, calculated in Prism (GraphPad 8)
		PBMCs enzymatic activity
Repeat participant		CS	mtDNAcn	CI	CII	CIV	MHI
Cell type proportions (%)	B cells	-0.08333	-0.2017	0.1667	-0.5167	-0.3167	0.05
	Neutrophils	0.1167	0.3025	-0.1833	0.6667	0.35	0.1333
	Natural killers	-0.5833	-0.4958	-0.4833	-0.2833	-0.25	-0.5333
	Monocytes	0.5833	0.1933	0.7	-0.3	-0.1833	0.1667
	CD8+ naïve	-0.1333	-0.3614	0.1333	-0.7	-0.3	-0.1
	CD4+ naïve	0.3167	0.1849	0.5167	-0.15	-0.35	0.4667
	CD8+ CM	0.4333	0.5883	0.5167	0.2167	-0.01667	0.2833
	CD8+ EM	-0.5667	-0.7395	-0.3167	-0.7167	-0.3667	-0.3667
	CD8+ TEMRA	-0.3833	-0.521	-0.2667	-0.3167	-0.4	-0.4333
	CD4+ CM	0.3667	0.5294	0.5333	0.08333	-0.06667	0.3167
	CD4+ EM	-0.5667	-0.7143	-0.1833	-0.9167	-0.3333	-0.01667
	CD4+ TEMRA	-0.4184	-0.5992	-0.4435	-0.5188	0.07531	-0.2092
Repeat participant	Cell type proportions (%)												PBMCs enzymatic activity
Week	B cells (%)	Neutrophils (%)	Natural killers (%)	Monocytes (%)	CD8+ naïve (%)	CD4+ naïve (%)	CD8+ CM (%)	CD8+ EM (%)	CD8+ TEMRA (%)	CD4+ CM (%)	CD4+ EM (%)	CD4+ TEMRA (%)	CS	mtDNAcn	CI	CII	CIV	MHI
1	1.56776	12.5255	11.7582	8.3798	6.69059	7.2371	0.96053	5.83494	3.87524	7.45791	6.78443	0.182169	138.3	262	3.5	85.19	13.52	161.29
2	1.42035	11.7065	10.0099	10.7017	6.7801	5.02086	0.354007	6.28093	2.74841	4.982	11.8118	0.616275	155.41	262	2.25	70.39	17.91	132.85
3	0.956655	31.8348	7.21272	7.90007	5.62295	6.47331	0.76105	3.97209	2.40917	4.88601	4.95806	0.271217	176.29	312	4.32	87.4	15.91	148.14
4	1.26725	26.0881	7.22502	2.43586	6.11604	5.69515	1.3544	4.10106	2.12393	10.1231	5.14926	0.0298175	155.77	364	3.17	91.81	18.73	145.54
5	1.14524	22.9266	9.38329	8.54627	6.29462	4.36717	1.12438	4.94877	2.49042	8.60008	5.91527	0.022856	191.9	344	4.47	88.88	14.84	134
6	1.44231	23.1933	9.03194	10.2845	6.50283	7.01814	1.13055	4.39486	3.03129	7.97185	4.85122	0.125949	222	364	4.38	105.65	17.05	133.92
7	1.76171	3.96868	10.8079	13.9527	9.65852	10.84	1.28584	4.59994	3.68013	10.051	5.60982	0.168424	191.96	353	4.54	86.64	15.7	134.17
8	1.80635	4.76483	5.65251	14.1805	11.3589	9.01946	1.40622	4.6868	2.2247	14.5258	8.08758	0.1003	211.44	346	11.41	71.24	15.49	176.78
9	0.857419	28.7137	5.81626	13.6213	5.21329	6.51965	1.02821	3.33792	1.69129	7.98322	4.85885	0.104902	258.75	380	11.16	101.13	16.26	165.17

## Sheet: b
*For cohort raw values, see source data for Figure 2a-b
*For repeat participant raw values, see source data for Figure 6-figure supplement 2a

## Sheet: c
* Spearman's r correlations between CBC-derived cell type proportion and PBMCs enzymatic activity in the repeat participant, calculated in Prism (GraphPad 8)
		PBMCs enzymatic activity
Repeat participant		CS	mtDNAcn	CI	CII	CIV	MHI
CBC-derived cell type proportions	Basophils (%)	-0.406	-0.4194	-0.406	-0.406	0.03961	-0.04951
	Eosinophils (%)	0.2882	0.2906	0.2712	-0.1187	0.1695	-0.2373
	Lymphocytes (%)	-0.1	0.008404	0.1333	-0.3333	-0.1333	0.2667
	Monocytes (%)	0	0.06723	0.3333	-0.3333	-0.2833	0.6667
	Neutrophils (%)	0.1333	0.01681	-0.08333	0.4	0.08333	-0.1833
	Platelet (10^9/L)	-0.2762	-0.3165	-0.2594	-0.4268	0.0251	0.2176
Raw data
Repeat participant
	CBC-derived cell type proportions						PBMCs enzymatic activity
Week	Basophils (%)	Eosinophils (%)	Lymphocytes (%)	Monocytes (%)	Neutrophils (%)	Platelet (10^9/L)	CS	mtDNAcn	CI	CII	CIV	MHI
1	0.6	3.8	26.7	6.9	61.8	256	138.3	262	3.5	85.19	13.52	161.29
2	0.7	4.5	24.7	5.9	63.7	252	155.41	262	2.25	70.39	17.91	132.85
3	0.4	3.8	25.2	6.5	64.1	232	176.29	312	4.32	87.4	15.91	148.14
4	0.4	5	27.7	6.6	59.7	240	155.77	364	3.17	91.81	18.73	145.54
5	0.4	4.2	21.9	5.3	67.5	228	191.9	344	4.47	88.88	14.84	134
6	0.4	5.3	25.3	6.1	62.7	242	222	364	4.38	105.65	17.05	133.92
7	0.4	6.3	31.1	7.8	54	231	191.96	353	4.54	86.64	15.7	134.17
8	0.4	5.4	37.4	7.9	48.5	244	211.44	346	11.41	71.24	15.49	176.78
9	0.5	3.8	21	6.4	67.9	242	258.75	380	11.16	101.13	16.26	165.17

## Sheet: d
*For cohort raw values, see source data for Figure 2-figure supplement 1
*For repeat participant raw values, see source data for Figure 6-figure supplement 2c

## Sheet: e
* Spearman's r correlations between cell type enzymatic activity and PBMCs enzymatic activity in the repeat participant, calculated in Prism (GraphPad 8)
*For raw values see source data for Figure 6b-g
		PBMCs enzymatic activity
Repeat participant		CS	mtDNAcn	CI	CII	CIV	MHI
Cell type enzymatic activity	Neutrophils	0.8833	0.6287	0.3833	0.4667	0.3833	-0.1
	Natural killers	0.8833	0.8397	-0.2	0.4333	-0.6	-0.1167
	Monocytes	0.75	0.6171	0.4286	-0.5714	0.03571	0.07143
	CD8+ naïve	0.3833	0.2521	0.5167	-0.35	0.2333	-0.2667
	CD4+ naïve	0.6167	0.1181	0.8	-0.1167	-0.15	0.7833
	CD4+ CM & EM	0.4286	0.7568	0.4286	-0.25	-0.1786	-0.6429

## Sheet: f
*For cohort raw values, see source data for Figure 4a-e, Appendix 2-figure 1b, and Figure 4-figure supplement 1
*For repeat participant raw values, see source data for Figure 6b-g and Figure 6-figure supplement 2e
