# Supplementary material for: Mitochondrial phenotypes in purified human immune cell subtypes and cell mixtures
Source: eLife. 2021 Oct 26;10:e70899. doi: 10.7554/eLife.70899 (PMC8612706; doi:10.7554/eLife.70899)
Supplement: Figure 6—figure supplement 3—source data 1. [file elife-70899-fig6-figsupp3-data1.xlsx]

## Sheet: a-e
*For cohort data (left), see source data for Figure 4a-e, and Appendix 2-figure 1b.
*For repeat participant data (right), see source data for Figure 6b-g.

## Sheet: f
*For technical variation of mitochondrial measures see Supplementary file 3_source data
CS activity					mtDNAcn						CI activity
	Repeat (CV%)	Cohort (CV%)				Repeat (CV%)	Cohort (CV%)					Repeat (CV%)	Cohort (CV%)
CD4+ CM & EM	20.9	20.8			CD4+ CM & EM	5	14.7				CD4+ CM & EM	8.4	16
CD4+ naïve	15.9	18.9			CD4+ naïve	9.7	15.7				CD4+ naïve	16.3	16.4
CD8+ naïve	7.3	19			CD8+ naïve	5.5	19.8				CD8+ naïve	17.7	18.5
Monocytes	20.2	17			Monocytes	4.1	12.3				Monocytes	15.7	19.4
Natural killers	13.6	20.5			Natural killers	13.1	25.8				Natural killers	18.5	19.7
Neutrophils	21.9	15.1			Neutrophils	18.3	16.5				Neutrophils	37.5	31.5
*For cohort data, see source data for Figure 4a					*For cohort data, see source data for Figure 4b						*For cohort data, see source data for Figure 4c
*For repeat participant data (right), see source data for Figure 6b					*For repeat participant data (right), see source data for Figure 6c						*For repeat participant data (right), see source data for Figure 6d
CII activity					CIV activity						MHI
	Repeat (CV%)	Cohort (CV%)				Repeat (CV%)	Cohort (CV%)					Repeat (CV%)	Cohort (CV%)
CD4+ CM & EM	4.1	17.4			CD4+ CM & EM	30.5	31				CD4+ CM & EM	8.3	15.6
CD4+ naïve	6.9	19.8			CD4+ naïve	64.4	27.9				CD4+ naïve	20.6	14.1
CD8+ naïve	7.1	21.8			CD8+ naïve	37.2	40.9				CD8+ naïve	13.6	14.6
Monocytes	8.1	13.4			Monocytes	29.4	17				Monocytes	13.6	11.3
Natural killers	9.4	19			Natural killers	31	26.9				Natural killers	9.2	17.4
Neutrophils	15.3	15.5			Neutrophils	15.2	55.8				Neutrophils	11.9	28.2
*For cohort data, see source data for Figure 4d					*For cohort data, see source data for Figure 4e						*For cohort data, see source data for Appendix 2-figure 1b
*For repeat participant data (right), see source data for Figure 6e					*For repeat participant data (right), see source data for Figure 6f						*For repeat participant data (right), see source data for Figure 6g
