# Supplementary material for: Mitochondrial phenotypes in purified human immune cell subtypes and cell mixtures
Source: eLife. 2021 Oct 26;10:e70899. doi: 10.7554/eLife.70899 (PMC8612706; doi:10.7554/eLife.70899)
Supplement: Figure 6—source data 1. [file elife-70899-fig6-data1.xlsx]

## Sheet: 6b
Repeat participant	CS activity z score								Repeat participant	Raw CS activity
Week	PBMCs	Natural killers	Neutrophils	Monocytes	CD8+ Naïve	CD4+ Naïve	CD4+ CM & EM		Week	PBMCs	Natural killers	Neutrophils	Monocytes	CD8+ Naïve	CD4+ Naïve	CD4+ CM & EM
1	-1.34318	-1.26792	-1.20463	NA	-1.10952	-1.33176	NA		1	138.3	18.2251	19.7416	NA	18.6582	15.4037	NA
2	-0.890702	-0.426277	-0.796367	NA	-0.561852	-0.361709	NA		2	155.41	20.7561	22.1369	NA	19.4746	18.4185	NA
3	-0.338527	-1.07763	-1.0687	-0.754121	-0.727224	-0.402726	-0.9763		3	176.29	18.7974	20.5391	36.0467	19.2281	18.2911	26.1098
4	-0.881181	-0.924476	-0.255944	-0.580986	-0.160904	0.44912	-0.328692		4	155.77	19.2579	25.3075	37.5319	20.0724	20.9385	30.5412
5	0.0742815	-0.155121	-0.063975	-0.179058	1.67143	-0.859161	-0.0868198		5	191.9	21.5715	26.4338	40.9798	22.8041	16.8725	32.1962
6	0.87028	0.657135	0.0233753	-0.544439	-0.667718	1.47873	-0.836632		6	222	24.0141	26.9463	37.8454	19.3168	24.1385	27.0655
7	0.0758682	0.786914	1.06793	-0.101276	1.01448	0.5467	-0.43016		7	191.96	24.4043	33.0746	41.647	21.8247	21.2418	29.8469
8	0.59102	0.870604	0.470634	-0.0206238	-0.590553	-0.853315	0.823247		8	211.44	24.656	29.5703	42.3389	19.4319	16.8907	38.4235
9	1.84214	1.53677	1.82768	2.1805	1.13186	1.33412	1.83536		9	258.75	26.6593	37.532	61.2208	21.9997	23.6891	45.349
									rMSSD	29.3285	1.80285	4.26884	8.11762	2.22692	4.45791	5.44605
									rMSSD/avg	0.155103	0.0818064	0.159231	0.190932	0.109634	0.228111	0.166087
									CV%	0.199978	0.136454	0.218841	0.201767	0.0733965	0.159033	0.208679

## Sheet: 6c
Repeat participant	mtDNAcn z score								Repeat participant	Raw mtDNAcn
Week	PBMCs	Natural killers	Neutrophils	Monocytes	CD8+ Naïve	CD4+ Naïve	CD4+ CM & EM		Week	PBMCs	Natural killers	Neutrophils	Monocytes	CD8+ Naïve	CD4+ Naïve	CD4+ CM & EM
1	-1.5964	-0.851302	-1.28639	NA	-1.895	-1.90658	NA		1	262	155.991	94.1859	NA	358.63	255.174	NA
2	-1.5964	-1.73785	-0.866919	NA	0.955657	1.227	NA		2	262	135.576	103.664	NA	420.863	350.506	NA
3	-0.454301	-0.555432	-1.17124	-1.06032	-1.14168	-0.931272	-0.67368		3	312	162.804	96.7877	291.415	375.076	284.845	311.295
4	0.73348	-0.0707817	-0.313717	0.219652	0.019042	-0.548814	0.403855		4	364	173.964	116.163	307.281	400.416	296.481	328.648
5	0.276641	-0.0846427	0.210321	-1.56008	-0.101107	-0.183976	-1.42319		5	344	173.645	128.003	285.22	397.793	307.58	299.225
6	0.73348	0.394378	0.189373	1.35104	0.0557843	0.724391	1.34107		6	364	184.675	127.53	321.306	401.218	335.215	343.741
7	0.482219	0.180799	1.60248	0.715988	0.490261	0.738851	-0.760166		7	353	179.757	159.458	313.434	410.703	335.655	309.902
8	0.322325	1.23219	1.07977	0.169245	1.37012	0.755578	0.130101		8	346	203.968	147.647	306.656	429.912	336.164	324.239
9	1.09895	1.49264	0.556319	0.164467	0.246918	0.124813	0.982003		9	380	209.965	135.82	306.597	405.391	316.974	337.958
									rMSSD	30.2696	16.0107	15.6191	18.9236	31.0047	42.9977	27.9501
									rMSSD/avg	0.0912041	0.0911805	0.126726	0.0621346	0.0775117	0.137295	0.0867628
									CV%	0.131909	0.131139	0.183319	0.040702	0.0545778	0.097142	0.0499901

## Sheet: 6d
Repeat participant	CI activity z score								Repeat participant	Raw CI activity
Week	PBMCs	Natural killers	Neutrophils	Monocytes	CD8+ Naïve	CD4+ Naïve	CD4+ CM & EM		Week	PBMCs	Natural killers	Neutrophils	Monocytes	CD8+ Naïve	CD4+ Naïve	CD4+ CM & EM
1	-0.581284	-0.276071	-0.380284	NA	0.675068	-0.705971	NA		1	3.5	1.43546	1.01437	NA	1.78385	1.2692	NA
2	-0.950745	-0.384579	-0.527034	NA	-0.454458	-1.92922	NA		2	2.25	1.40517	0.949188	NA	1.46507	0.983278	NA
3	-0.338918	-0.837608	-1.21923	-0.617227	-0.958453	-0.404809	0.74663		3	4.32	1.27872	0.64173	2.90338	1.32283	1.33959	2.01244
4	-0.678822	1.46059	0.0152329	-0.964437	-1.68824	0.0291173	-1.78565		4	3.17	1.92018	1.19005	2.72873	1.11687	1.44101	1.60776
5	-0.294583	1.1177	0.683124	0.807203	1.05526	0.300175	-0.103694		5	4.47	1.82448	1.48671	3.61988	1.89114	1.50437	1.87655
6	-0.321184	-0.920371	-0.691784	-0.244776	-0.250195	0.528017	-0.338477		6	4.38	1.25562	0.87601	3.09073	1.52272	1.55762	1.83903
7	-0.273893	1.25588	0.734324	0.4048	1.4344	-0.319114	0.5778		7	4.54	1.86304	1.50945	3.41747	1.99815	1.35962	1.98546
8	1.75666	-0.343411	2.04308	1.65347	0.491989	1.33682	1.2844		8	11.41	1.41666	2.09077	4.04556	1.73218	1.74667	2.09838
9	1.68277	-1.07213	-0.657429	-1.03903	-0.305367	1.16498	-0.381008		9	11.16	1.21326	0.89127	2.69121	1.50714	1.7065	1.83224
									rMSSD	2.64936	0.413933	0.616279	0.757206	0.394799	0.228165	0.238902
									rMSSD/avg	0.48464	0.273673	0.520821	0.235607	0.247783	0.159088	0.126194
									CV%	0.618899	0.184537	0.375376	0.156513	0.177128	0.162973	0.0844148

## Sheet: 6e
Repeat participant	CII activity z score								Repeat participant	Raw CII activity
Week	PBMCs	Natural killers	Neutrophils	Monocytes	CD8+ Naïve	CD4+ Naïve	CD4+ CM & EM		Week	PBMCs	Natural killers	Neutrophils	Monocytes	CD8+ Naïve	CD4+ Naïve	CD4+ CM & EM
1	-0.204971	-0.814263	-0.391833	NA	-0.12443	-1.71381	NA		1	85.19	18.0547	11.6519	NA	18.2447	15.9554	NA
2	-1.46779	-1.37959	-0.627913	NA	0.561452	-0.255114	NA		2	70.39	17.011	11.2027	NA	19.1364	17.7904	NA
3	-0.0164015	-0.370406	-0.40843	-0.407053	0.643901	-0.868558	-1.04622		3	87.4	18.8741	11.6204	27.2286	19.2436	17.0187	22.459
4	0.359885	0.780521	1.59784	0.40872	0.447588	0.579975	-1.03756		4	91.81	20.9988	15.4381	29.0972	18.9884	18.8409	22.4674
5	0.109881	-1.34774	0.856758	-1.2439	0.684529	-0.389534	0.560186		5	88.88	17.0698	14.0279	25.3117	19.2964	17.6213	24.0019
6	1.54079	1.04086	-0.507445	-1.18466	-0.517042	-0.436122	-0.495667		6	105.65	21.4795	11.4319	25.4474	17.7342	17.5627	22.9878
7	-0.0812491	1.11073	0.787789	1.50908	0.902504	1.39169	-0.431652		7	86.64	21.6084	13.8967	31.6178	19.5798	19.8621	23.0493
8	-1.39527	0.681875	-1.71788	0.553774	-0.267793	1.16016	1.42494		8	71.24	20.8167	9.12858	29.4295	18.0583	19.5708	24.8325
9	1.15512	0.298011	0.411114	0.364042	-2.33071	0.531317	1.02597		9	101.13	20.1081	13.1799	28.9949	15.3762	18.7797	24.4493
									rMSSD	16.9912	2.3744	2.93476	3.18569	1.42838	1.35887	1.05781
									rMSSD/avg	0.19398	0.121404	0.23672	0.113124	0.0776021	0.0750288	0.0450826
									CV%	0.133799	0.0943919	0.153492	0.0813404	0.070635	0.0694591	0.0409337

## Sheet: 6f
Repeat participant	CIV activity z score								Repeat participant	Raw CIV activity
Week	PBMCs	Natural killers	Neutrophils	Monocytes	CD8+ Naïve	CD4+ Naïve	CD4+ CM & EM		Week	PBMCs	Natural killers	Neutrophils	Monocytes	CD8+ Naïve	CD4+ Naïve	CD4+ CM & EM
1	-1.67157	-0.0437551	-1.8095	NA	-0.612925	0.0426372	NA		1	13.52	3.13023	2.40691	NA	2.43269	2.65198	NA
2	1.11157	-0.0603208	-0.6005	NA	0.149194	-1.55258	NA		2	17.91	3.11392	3.01644	NA	3.32475	0	NA
3	-0.15638	0.0554633	-0.685382	-2.16166	1.74165	0.279169	-2.17858		3	15.91	3.22795	2.97364	1.87425	5.18872	3.0452	1.27272
4	1.63142	-1.97925	1.69824	0.559175	-1.56879	-1.31164	0.0327521		4	18.73	1.22406	4.17537	5.99624	1.31385	0.400554	3.82471
5	-0.834731	1.64296	-0.0586324	0.260743	-0.833716	-0.757903	0.554663		5	14.84	4.79139	3.28963	5.54413	2.17426	1.32112	4.42702
6	0.566349	-0.647342	-0.121604	0.0909152	0.986457	1.41737	0.283562		6	17.05	2.53579	3.25788	5.28684	4.30477	4.9374	4.11415
7	-0.289514	-0.288036	0.427574	-0.0799722	-0.0289312	0.697992	-0.00202261		7	15.7	2.88965	3.53475	5.02795	3.11626	3.74147	3.78457
8	-0.422648	0.637451	0.301729	0.817658	-0.377255	0.50109	0.595349		8	15.49	3.80112	3.4713	6.38784	2.70854	3.41413	4.47397
9	0.0655105	0.682835	0.848079	0.513146	0.544315	0.683871	0.71428		9	16.26	3.84581	3.74675	5.92651	3.78724	3.71799	4.61122
									rMSSD	2.59085	1.68821	0.587324	1.79771	1.84751	2.20383	1.12369
									rMSSD/avg	0.160358	0.531999	0.176948	0.34913	0.58649	0.853837	0.296729
									CV%	0.0976288	0.310352	0.151892	0.29422	0.371573	0.644087	0.304747

## Sheet: 6g
Repeat participant	MHI z score								Repeat participant	Raw MHI
Week	PBMCs	Natural killers	Neutrophils	Monocytes	CD8+ Naïve	CD4+ Naïve	CD4+ CM & EM		Week	PBMCs	Natural killers	Neutrophils	Monocytes	CD8+ Naïve	CD4+ Naïve	CD4+ CM & EM
1	0.817194	0.379115	-0.345247	NA	0.197525	0.368057	NA		1	161.29	116.909	89.2969	NA	88.6199	91.49	NA
2	-0.92952	-0.00534196	-0.301135	NA	-0.0857163	-2.02993	NA		2	132.85	112.908	89.7853	NA	85.2929	49.4791	NA
3	0.00955384	0.0683751	-0.727215	-1.21904	1.58478	0.409756	-1.67816		3	148.14	113.675	85.0679	107.363	104.915	92.2206	86.4862
4	-0.150132	-0.565867	1.82362	0.529458	-2.07031	-1.05236	-0.521188		4	145.54	107.075	113.31	137.966	61.9812	66.6055	96.128
5	-0.85889	2.14754	0.899233	-0.517646	-0.343854	-0.415323	1.12597		5	134	135.312	103.075	119.639	82.2607	77.7658	109.855
6	-0.863803	-1.33738	-0.962878	0.112231	0.748748	0.198012	0.597976		6	133.92	99.0465	82.4587	130.663	95.0947	88.511	105.455
7	-0.848449	0.410075	0.0129304	0.576346	0.549496	0.586643	0.67384		7	134.17	117.231	93.2625	138.786	92.7543	95.3195	106.087
8	1.76855	-0.123092	0.829918	1.57963	-0.347416	1.10954	0.538366		8	176.78	111.683	102.308	156.346	82.2189	104.48	104.958
9	1.05549	-0.973422	-1.22923	-1.06098	-0.233249	0.825604	-0.736805		9	165.17	102.834	79.5097	110.129	83.5599	99.5059	94.3311
									rMSSD	19.7896	18.0708	16.0787	25.5089	19.1496	24.0907	8.32022
									rMSSD/avg	0.133727	0.15997	0.172668	0.198206	0.221896	0.283281	0.0828118
									CV%	0.110025	0.0921217	0.118898	0.135994	0.13611	0.206007	0.0829457

## Sheet: 6h
*For cohort data (left), see source data for Figure 4a.
*For repeat participant data (right), see source data for Figure 6b.

## Sheet: 6i
*Spearman's r values for correlations between cell subtypes across mitochondrial features, calculated in Prism (GraphPad 8). For raw values see source data 6b-g.
	Spearman's r								p values
CS activity		PBMCs	Natural killers	Neutrophils	Monocytes	CD8+ Naïve	CD4+ Naïve			PBMCs	Natural killers	Neutrophils	Monocytes	CD8+ Naïve	CD4+ Naïve
	PBMCs								PBMCs
	Natural killers	0.883333							Natural killers	0.0030754
	Neutrophils	0.883333	0.966667						Neutrophils	0.0030754	0.000165344
	Monocytes	0.75	0.964286	0.928571					Monocytes	0.0662698	0.00277778	0.00674603
	CD8+ Naïve	0.383333	0.566667	0.633333	0.571429				CD8+ Naïve	0.3125	0.120574	0.0760362	0.2
	CD4+ Naïve	0.616667	0.516667	0.6	0.107143	0.25			CD4+ Naïve	0.0857253	0.1618	0.0967978	0.839683	0.520635
	CD4+ CM & EM	0.428571	0.714286	0.607143	0.821429	0.678571	-0.178571		CD4+ CM & EM	0.353571	0.0880952	0.166667	0.034127	0.109524	0.713095
mtDNAcn		PBMCs	Natural killers	Neutrophils	Monocytes	CD8 Naïve	CD4 Naïve			PBMCs	Natural killers	Neutrophils	Monocytes	CD8+ Naïve	CD4+ Naïve
	PBMCs								PBMCs
	Natural killers	0.83967							Natural killers	0.00651455
	Neutrophils	0.628698	0.810924						Neutrophils	0.0761023	0.0103946
	Monocytes	0.617065	0.504871	0.448775					Monocytes	0.152381	0.269048	0.333333
	CD8+ Naïve	0.25211	0.426782	0.686198	0.592999				CD8+ Naïve	0.507099	0.253461	0.0469687	0.183333
	CD4+ Naïve	0.118145	0.260504	0.613445	0.635764	0.937247			CD4+ Naïve	0.760747	0.493811	0.0845679	0.133333	0.000496032
	CD4+ CM & EM	0.756787	0.540562	-0.108112	0.592999	0.214286	0.072075		CD4+ CM & EM	0.0579365	0.213492	0.820635	0.183333	0.661508	0.887302
										PBMCs	Natural killers	Neutrophils	Monocytes	CD8+ Naïve	CD4+ Naïve
CI activity		PBMCs	Natural killers	Neutrophils	Monocytes	CD8 Naïve	CD4 Naïve		PBMCs
	PBMCs								Natural killers	0.613404
	Natural killers	-0.2							Neutrophils	0.3125	0.0368662
	Neutrophils	0.383333	0.716667						Monocytes	0.353571	0.555952	0.109524
	Monocytes	0.428571	0.285714	0.678571					CD8+ Naïve	0.1618	0.493331	0.120574	0.0662698
	CD8+ Naïve	0.516667	0.266667	0.566667	0.75				CD4+ Naïve	0.0138283	0.551709	0.520635	0.661508	0.743541
	CD4+ Naïve	0.8	-0.233333	0.25	0.214286	0.133333			CD4+ CM & EM	0.353571	0.963492	0.497619	0.0880952	0.302381	0.963492
	CD4+ CM & EM	0.428571	-0.0357143	0.321429	0.714286	0.464286	-0.0357143
										PBMCs	Natural killers	Neutrophils	Monocytes	CD8+ Naïve	CD4+ Naïve
CII activity		PBMCs	Natural killers	Neutrophils	Monocytes	CD8 Naïve	CD4 Naïve		PBMCs
	PBMCs								Natural killers	0.249917
	Natural killers	0.433333							Neutrophils	0.212522	0.677745
	Neutrophils	0.466667	0.166667						Monocytes	0.2	0.166667	0.963492
	Monocytes	-0.571429	0.607143	-0.0357143					CD8+ Naïve	0.358581	0.743541	0.33626	0.78254
	CD8+ Naïve	-0.35	-0.133333	0.366667	0.142857				CD4+ Naïve	0.775628	0.1618	0.708069	0.0238095	0.775628
	CD4+ Naïve	-0.116667	0.516667	0.15	0.857143	0.116667			CD4+ CM & EM	0.594841	0.839683	0.555952	0.661508	0.555952	0.266667
	CD4+ CM & EM	-0.25	-0.107143	-0.285714	0.214286	-0.285714	0.5
										PBMCs	Natural killers	Neutrophils	Monocytes	CD8+ Naïve	CD4+ Naïve
CIV activity		PBMCs	Natural killers	Neutrophils	Monocytes	CD8 Naïve	CD4 Naïve		PBMCs
	PBMCs								Natural killers	0.0967978
	Natural killers	-0.6							Neutrophils	0.3125	0.775628
	Neutrophils	0.383333	-0.116667						Monocytes	0.963492	0.839683	0.166667
	Monocytes	0.0357143	0.107143	0.607143					CD8+ Naïve	0.551709	0.948391	0.385323	0.109524
	CD8+ Naïve	0.233333	0.0333333	-0.333333	-0.678571				CD4+ Naïve	0.708069	0.948391	0.708069	0.497619	0.1618
	CD4+ Naïve	-0.15	-0.0333333	0.15	-0.321429	0.516667			CD4+ CM & EM	0.713095	0.2	0.497619	0.0880952	0.594841	0.839683
	CD4+ CM & EM	-0.178571	0.571429	0.321429	0.714286	-0.25	0.107143
MHI		PBMCs	Natural killers	Neutrophils	Monocytes	CD8 Naïve	CD4 Naïve			PBMCs	Natural killers	Neutrophils	Monocytes	CD8+ Naïve	CD4+ Naïve
	PBMCs								PBMCs
	Natural killers	-0.116667							Natural killers	0.775628
	Neutrophils	-0.1	0.416667						Neutrophils	0.809981	0.269582
	Monocytes	0.0714286	0.0357143	0.464286					Monocytes	0.906349	0.963492	0.302381
	CD8+ Naïve	-0.266667	0.1	-0.666667	-0.535714				CD8+ Naïve	0.493331	0.809981	0.05889	0.235714
	CD4+ Naïve	0.783333	-0.0666667	-0.316667	0.214286	0.1			CD4+ Naïve	0.0172233	0.880093	0.41008	0.661508	0.809981
	CD4+ CM & EM	-0.642857	0.428571	0.357143	0.464286	-0.178571	-0.214286		CD4+ CM & EM	0.138889	0.353571	0.444444	0.302381	0.713095	0.661508

## Sheet: 6j
*Individual Spearman's r values were first transformed to Fisher's Z, then averaged before transforming back to Spearman's r
	Avg Spearman's r
CS	0.7
mtDNAcn	0.55
CI	0.39
CII	0.14
CIV	0.06
MHI	0.02

## Sheet: 6k
*Spearman's r values for calculated in Prism (GraphPad 8).
*For raw cohort data see source data for Figure 4.
*For raw repeat participant data see source data for Figure 6b-g.
CS activity				mtDNAcn				CI activity				CII activity				CIV activity				MHI activity
	Cohort (spearman's r)	Repeat (spearman's r)			Cohort (spearman's r)	Repeat (spearman's r)			Cohort (spearman's r)	Repeat (spearman's r)			Cohort (spearman's r)	Repeat (spearman's r)			Cohort (spearman's r)	Repeat (spearman's r)			Cohort (spearman's r)	Repeat (spearman's r)
NE-NK	0.547619	0.966667		NE-NK	0.380952	0.810924		NE-NK	-0.610789	0.716667		NE-NK	0.419169	0.166667		NE-NK	0.690476	-0.116667		NE-NK	0.547619	0.416667
NE-MO	0.881818	0.928571		NE-MO	0.690909	0.448775		NE-MO	-0.273349	0.678571		NE-MO	0.132119	-0.0357143		NE-MO	0.4	0.607143		NE-MO	0.190909	0.464286
NE-CD4N	0.383333	0.6		NE-CD4N	0.316667	0.613445		NE-CD4N	0.35	0.25		NE-CD4N	-0.0333333	0.15		NE-CD4N	0.633333	0.15		NE-CD4N	0.566667	-0.316667
NE-CD4CMEM	0.754545	0.607143		NE-CD4CMEM	0.4	-0.108112		NE-CD4CMEM	0.141553	0.321429		NE-CD4CMEM	0.318182	-0.285714		NE-CD4CMEM	0.0454545	0.321429		NE-CD4CMEM	0.290909	0.357143
NK-MO	0.863636	0.964286		NK-MO	0.709091	0.504871		NK-MO	0.0683373	0.285714		NK-MO	0.809091	0.607143		NK-MO	-0.0364466	0.107143		NK-MO	0.545455	0.0357143
NK-CD8N	0.428571	0.566667		NK-CD8N	0.928571	0.426782		NK-CD8N	0.214286	0.266667		NK-CD8N	0.5	-0.133333		NK-CD8N	-0.0357143	0.0333333		NK-CD8N	0.642857	0.1
NK-CD4N	0.718182	0.516667		NK-CD4N	0.881818	0.260504		NK-CD4N	0.409091	-0.233333		NK-CD4N	0.645455	0.516667		NK-CD4N	-0.290909	-0.0333333		NK-CD4N	0.172727	-0.0666667
NK-CD4CMEM	0.917582	0.714286		NK-CD4CMEM	0.543956	0.540562		NK-CD4CMEM	0.112792	-0.0357143		NK-CD4CMEM	0.159341	-0.107143		NK-CD4CMEM	0.258242	0.571429		NK-CD4CMEM	0.505495	0.428571
MO-CD8N	0.636364	0.571429		MO-CD8N	0.745455	0.592999		MO-CD8N	0.395139	0.75		MO-CD8N	0.624242	0.142857		MO-CD8N	0.139394	-0.678571		MO-CD8N	0.175758	-0.535714
MO-CD4N	0.778571	0.107143		MO-CD4N	0.866846	0.635764		MO-CD4N	0.292857	0.214286		MO-CD4N	0.660714	0.857143		MO-CD4N	0.696429	-0.321429		MO-CD4N	0.585714	0.214286
MO-CD4CMEM	0.845588	0.821429		MO-CD4CMEM	0.595588	0.592999		MO-CD4CMEM	0.409816	0.714286		MO-CD4CMEM	0.210784	0.214286		MO-CD4CMEM	-0.129902	0.714286		MO-CD4CMEM	0.311275	0.464286
CD8N-CD4N	0.657343	0.25		CD8N-CD4N	0.767076	0.937247		CD8N-CD4N	0.273205	0.133333		CD8N-CD4N	0.881119	0.116667		CD8N-CD4N	0.125874	0.516667		CD8N-CD4N	0.0979021	0.1
CD8N-CD4CMEM	0.468531	0.678571		CD8N-CD4CMEM	0.629371	0.214286		CD8N-CD4CMEM	0.236842	0.464286		CD8N-CD4CMEM	0.412587	-0.285714		CD8N-CD4CMEM	-0.0769231	-0.25		CD8N-CD4CMEM	0.216783	-0.178571
CD4N-CD4CMEM	0.682147	-0.178571		CD4N-CD4CMEM	0.735158	0.072075		CD4N-CD4CMEM	0.375194	-0.0357143		CD4N-CD4CMEM	0.285862	0.5		CD4N-CD4CMEM	0.122807	0.107143		CD4N-CD4CMEM	0.244582	-0.214286
