# Supplementary material for: Mitochondrial phenotypes in purified human immune cell subtypes and cell mixtures
Source: eLife. 2021 Oct 26;10:e70899. doi: 10.7554/eLife.70899 (PMC8612706; doi:10.7554/eLife.70899)
Supplement: Figure 7—source data 1. [file elife-70899-fig7-data1.xlsx]

## Sheet: 7b
Mitotypes: mtDNA density per mitochondrion (in cohort)
*For raw values see source data for Figure 4
	CS activity (x)		mtDNAcn (y)
	mean	SEM	mean	SEM
B cells	34.31	1.56	451.28	20.56
Neutrophils	23.13	1.01	128.05	6.11
Natural killers	24.8	1.36	205.16	14.17
Monocytes	39.35	1.58	296.82	8.63
CD8+ Naïve	25.86	1.42	426.84	24.39
CD4+ Naïve	22.18	0.99	325.83	12.07
CD8+ CM & EM	25.53	1.38	300.28	17.22
CD4+ CM & EM	29.81	1.38	322.9	10.62
PBMCs	53.5	3.59	408.65	14.39

## Sheet: 7c
Mitotypes: CII activity per unit of genome (in cohort)
*For raw values see source data for Figure 4
	mtDNAcn (x)		CII activity (y)
	mean	SEM	mean	SEM
B cells	451.28	20.56	17.86	1.12
Neutrophils	128.05	6.11	11.11	0.5
Natural killers	205.16	14.17	20.77	1.06
Monocytes	296.82	8.63	26.97	0.85
CD8+ Naïve	426.84	24.39	19.25	1.21
CD4+ Naïve	325.83	12.07	17.63	0.82
CD8+ CM & EM	300.28	17.22	21.28	1.38
CD4+ CM & EM	322.9	10.62	21.34	0.83
PBMCs	408.65	14.39	32.61	1.92

## Sheet: 7d
Mitotypes: CI activity per unit of genome in relation to mtDNA density (in cohort)
*For raw values see source data for Figure 4
	mtDNAcn/CS activity (x)		CI activity/mtDNAcn (y)
	mean	SEM	mean	SEM
B cells	13.581	0.982827	0.00317601	0.000202161
Neutrophils	5.7411	0.535375	0.00767682	0.00071289
Natural killers	8.55879	0.685488	0.00824219	0.000612138
Monocytes	7.79831	0.439267	0.00977747	0.000617523
CD8+ Naïve	17.0339	1.27656	0.00416733	0.000334857
CD4+ Naïve	15.1994	0.862975	0.00434369	0.00022031
CD8+ CM & EM	12.0931	0.833954	0.00537033	0.000554674
CD4+ CM & EM	11.2214	0.589077	0.00544107	0.000279803
PBMCs	7.98097	0.318728	0.00677806	0.000397461

## Sheet: 7e
Mitotypes: CI activity per mito in relation to mtDNA density (in cohort)
*For raw values see source data for Figure 4
	mtDNAcn/CS activity (x)		CI activity/CS activity (y)
	mean	SEM	mean	SEM
B cells	13.581	0.982827	0.0417777	0.00272862
Neutrophils	5.7411	0.535375	0.0428635	0.00430414
Natural killers	8.55879	0.685488	0.0671832	0.00448601
Monocytes	7.79831	0.439267	0.0731685	0.0031374
CD8+ Naïve	17.0339	1.27656	0.0667094	0.00241095
CD4+ Naïve	15.1994	0.862975	0.0639949	0.00301787
CD8+ CM & EM	12.0931	0.833954	0.0611166	0.00551815
CD4+ CM & EM	11.2214	0.589077	0.0589164	0.00231672
PBMCs	7.98097	0.318728	0.0529834	0.00329331

## Sheet: 7f
*For raw data see source data for Figure 4

## Sheet: 7g
Mitotypes: mtDNA density per mitochondrion (in cohort and repeat participant)
*For cohort raw values see source data for Figure 4
*For repeat participant raw values see source data for Figure 6
	Cohort						Repeat participant
	CS activity (x)		mtDNAcn (y)				CS activity (x)		mtDNAcn (y)
	mean	SEM	mean	SEM			mean	SEM	mean	SEM
Neutrophils	23.13	1.01	128.05	6.11		Neutrophils	26.8091	1.95564	123.251	7.53139
Natural killers	24.8	1.36	205.16	14.17		Natural killers	22.038	1.00239	175.594	7.67575
Monocytes	39.35	1.58	296.82	8.63		Monocytes	42.5158	3.24228	304.558	4.6853
CD8+ Naïve	25.86	1.42	426.84	24.39		CD8+ Naïve	20.3123	0.49695	400	7.27704
CD4+ Naïve	22.18	0.99	325.83	12.07		CD4+ Naïve	19.5427	1.03598	313.177	10.1409
CD4+ CM & EM	29.81	1.38	322.9	10.62		CD4+ CM & EM	32.7903	2.58627	322.144	6.08674

## Sheet: 7h
Mitotypes: CI activity per unit of genome (in cohort and repeat participant)
*For cohort raw values see source data for Figure 4
*For repeat participant raw values see source data for Figure 6
	Cohort						Repeat participant
	mtDNAcn (x)		CI activity (y)				mtDNAcn (x)		CI activity (y)
	mean	SEM	mean	SEM			mean	SEM	mean	SEM
Neutrophils	128.05	6.11	0.970534	0.0881287		Neutrophils	123.251	7.53139	1.18328	0.148059
Natural killers	205.16	14.17	1.60892	0.0849042		Natural killers	175.594	7.67575	1.51251	0.0930381
Monocytes	296.82	8.63	2.84341	0.130284		Monocytes	304.558	4.6853	3.21385	0.190119
CD8+ Naïve	426.84	24.39	1.71182	0.0915696		CD8+ Naïve	400	7.27704	1.59333	0.0940742
CD4+ Naïve	325.83	12.07	1.38746	0.0537151		CD4+ Naïve	313.177	10.1409	1.43421	0.0779122
CD4+ CM & EM	322.9	10.62	1.71422	0.0612221		CD4+ CM & EM	322.144	6.08674	1.89312	0.0604017

## Sheet: 7i
Mitotypes: CII activity per unit of genome (in cohort and repeat participant)
*For cohort raw values see source data for Figure 4
*For repeat participant raw values see source data for Figure 6
	Cohort						Repeat participant
	mtDNAcn (x)		CII activity (x)				mtDNAcn (x)		CII activity (y)
	mean	SEM	mean	SEM			mean	SEM	mean	SEM
Neutrophils	128.05	6.11	11.1073	0.497055		Neutrophils	123.251	7.53139	12.3976	0.634308
Natural killers	205.16	14.17	20.7656	1.05654		Natural killers	175.594	7.67575	19.5579	0.615369
Monocytes	296.82	8.63	26.9689	0.854193		Monocytes	304.558	4.6853	28.161	0.865776
CD8+ Naïve	426.84	24.39	19.2539	1.21343		CD8+ Naïve	400	7.27704	18.4064	0.433379
CD4+ Naïve	325.83	12.07	17.6282	0.822806		CD4+ Naïve	313.177	10.1409	18.1113	0.419332
CD4+ CM & EM	322.9	10.62	21.3392	0.830237		CD4+ CM & EM	322.144	6.08674	23.4639	0.363022

## Sheet: 7j
Cell subtype co-regulation between cohort and repeated measures
*Effect sizes calculated using https://www.cem.org/effect-size-calculator excel template
*For cohort raw values see source data for Figure 4 and Figure 8 "Raw mitotype data"
*For repeat participant raw data see source data for Figure 6 and Figure 8 "Raw mitotype data"
Cell type variation (dark blue bars)												Inter-individual variation light blue bars)
			Celltype 1			Celltype 2								Individuals			Repeat participant
Mitotype	Celltype 1	Celltype 2	mean	n	SD	mean	n	SD	Hedge's g (absolute value)	SEM		Mitotype	Cell type	mean	n	SD	mean	n	SD	Hedge's g (absolute value)	SEM
mtDNAcn/CS	CD8+ Naïve	Monocytes	17.0339	12	4.42214	7.79831	18	1.86365	2.87153	0.525658		mtDNAcn/CS	CD8+ Naïve	17.0339	12	4.42214	19.7634	9	1.51877	0.747305	0.455786
	4CMEM	CD4+ Naïve	11.2214	20	2.63443	15.1994	18	3.66129	1.23194	0.354295			Monocytes	7.79831	18	1.86365	7.35692	7	1.17037	0.249591	0.446832
	Neutrophils	Natural killers	5.7411	12	1.8546	8.55879	14	2.56486	1.20358	0.42734			CD4+ CMEM	11.2214	20	2.63443	10.1359	7	1.87133	0.425759	0.442961
CI/mtDNAcn	Monocytes	CD8+ Naïve	0.00977747	18	0.00261993	0.00416733	12	0.00115998	2.51869	0.49459			CD4+ Naïve	15.1994	18	3.66129	16.2811	9	2.34319	0.318177	0.410538
	CD4+ CMEM	CD4+ Naïve	0.00544107	20	0.00125132	0.00434369	18	0.000934695	0.965185	0.343239			Neutrophils	5.7411	12	1.8546	4.64048	9	0.399473	0.736359	0.455362
	Neutrophils	Natural killers	0.00767682	12	0.00246952	0.00824219	14	0.00229041	0.230611	0.394696			Natural killers	8.55879	14	2.56486	8.00441	9	0.755225	0.25798	0.428936
CII/mtDNAcn	CD8+ Naïve	Monocytes	0.0456064	12	0.00783114	0.0920447	18	0.0156746	3.43235	0.578999		CI/mtDNAcn	Monocytes	0.00977747	18	0.00261993	0.0105754	7	0.0017715	0.317863	0.447698
	4CMEM	CD4+ Naïve	0.0667712	20	0.0119355	0.0544921	18	0.00943037	1.1105	0.348973			CD8+ Naïve	0.00416733	12	0.00115998	0.00399252	9	0.000737134	0.167152	0.441712
	Neutrophils	Natural killers	0.0885754	12	0.0179877	0.106844	14	0.0297341	0.706407	0.405411			CD4+ CMEM	0.00544107	20	0.00125132	0.00589688	7	0.00065673	0.388715	0.442329
													CD4+ Naïve	0.00434369	18	0.000934695	0.00461226	9	0.000774247	0.293822	0.410202
													Neutrophils	0.00767682	12	0.00246952	0.0094971	9	0.00255606	0.697153	0.45389
													Natural killers	0.00824219	14	0.00229041	0.00876144	9	0.00195036	0.23092	0.428601
												CII/mtDNAcn	CD8+ Naïve	0.0456064	12	0.00783114	0.0461542	9	0.00429272	0.0799417	0.441131
													Monocytes	0.0920447	18	0.0156746	0.0924982	7	0.00686958	0.0314897	0.445458
													CD4+ CMEM	0.0667712	20	0.0119355	0.0729867	7	0.00460008	0.56624	0.445864
													CD4+ Naïve	0.0544921	18	0.00943037	0.0581001	9	0.00420784	0.430293	0.412426
													Neutrophils	0.0885754	12	0.0179877	0.103332	9	0.0219166	0.717671	0.454651
													Natural killers	0.106844	14	0.0297341	0.112278	9	0.0107351	0.215405	0.428425
