# Supplementary material for: Mitochondrial phenotypes in purified human immune cell subtypes and cell mixtures
Source: eLife. 2021 Oct 26;10:e70899. doi: 10.7554/eLife.70899 (PMC8612706; doi:10.7554/eLife.70899)
Supplement: Figure 8—source data 1. [file elife-70899-fig8-data1.xlsx]

## Sheet: 8a
Mitotype sex differences
*For raw mitotype data see source Figure 8 "Raw Mitotype data"
Pie charts									Outcome measure				Women			Men						Sex diff.	Effect size
Mito content			Enzymatic activity						Celltype	Mitotype		Units	mean	n	SD	mean	n	SD	Hedge's g	Lower 95% CI	Upper 95% CI	Higher in women	Large
Location	Expected	Observed	Location	Expected	Observed				Neutrophils	CII / mtDNAcn/CS		yield per density	2.32079	7	0.401561	1.68559	5	0.466428	1.36734	0.0959899	2.63868
Higher in women	18	4	Higher in women	13.5	16				Monocyte	CI / mtDNAcn/CS		yield per density	0.467133	10	0.149436	0.299539	8	0.0945587	1.2435	0.228942	2.25806
Higher in men	18	32	Higher in men	13.5	11				Neutrophils	CII/mtDNAcn / mtDNAcn/CS		genome in relation to density	0.0193442	7	0.00403058	0.0131549	5	0.00558527	1.21149	-0.0342994	2.45728
									Monocyte	CI/mtDNAcn		genome	0.011041	10	0.00268067	0.008198	8	0.00151615	1.20505	0.195455	2.21464
p value for chi^2:	3.06125e-06		p value for chi^2:	0.335924					Monocyte	CI/CII		enzymatic activity	0.116545	10	0.0220908	0.0941087	8	0.0166679	1.07361	0.0799661	2.06725
									Monocytes	CI/mtDNAcn / mtDNAcn/CS		genome in relation to density	0.00168397	10	0.000771423	0.000999903	8	0.000346886	1.04665	0.0560784	2.03721
									Monocyte	CI/CIV		enzymatic activity	0.625815	10	0.137138	0.508496	8	0.108079	0.891951	-0.0823291	1.86623
Unit of genome			Yield per mtDNA density						Neutrophils	CII/mtDNAcn		genome	0.0952988	7	0.013968	0.0791625	5	0.0201808	0.88993	-0.311667	2.09153
Location	Expected	Observed	Location	Expected	Observed				Monocyte	CII / mtDNAcn/CS		yield per density	4.01887	10	1.07676	3.1799	8	0.773642	0.835679	-0.133263	1.80462		Medium
Higher in women	13.5	14	Higher in women	13.5	22				Monocytes	CII/mtDNAcn / mtDNAcn/CS		genome in relation to density	0.0143332	10	0.00543553	0.0106716	8	0.00335607	0.751188	-0.210343	1.71272
Higher in men	13.5	13	Higher in men	13.5	5				Neutrophils	CIV / mtDNAcn/CS		yield per density	0.828082	7	0.592973	0.462453	5	0.180469	0.712897	-0.46965	1.89544
									Neutrophils	CIV/mtDNAcn / mtDNAcn/CS		genome in relation to density	0.00719126	7	0.0060375	0.00357973	5	0.00172606	0.693975	-0.486769	1.87472		Small
p value for chi^2:	0.84739		p value for chi^2:	0.00106921					Neutrophils	CIV/mtDNAcn		genome	0.0344257	7	0.0254791	0.0215248	5	0.00682941	0.589259	-0.582342	1.76086
									all PBMCs	CI/CIV		enzymatic activity	0.63072	10	0.132426	0.539705	10	0.164846	0.58297	-0.311977	1.47792
									CD4 memory	CII / mtDNAcn/CS		yield per density	2.17767	10	0.668988	1.83004	10	0.474578	0.574029	-0.320363	1.46842
Genome in relation to density				Mitotype colour-coding					Monocyte	CIV / mtDNAcn/CS		yield per density	0.761508	10	0.247077	0.616228	8	0.23403	0.572983	-0.375363	1.52133
Location	Expected	Observed		Yield per density					CD8 memory	CI / mtDNAcn/CS		yield per density	0.158286	6	0.0700772	0.118433	6	0.0614769	0.557914	-0.595476	1.7113
Higher in women	13.5	21		Mito content					CD8 memory	CIV / mtDNAcn/CS		yield per density	0.361047	6	0.179099	0.278208	6	0.0766866	0.554888	-0.598268	1.70804
Higher in men	13.5	6		Enzymatic activity					all PBMCs	CI/CII		enzymatic activity	0.0909146	10	0.0197757	0.0787773	10	0.0221138	0.554115	-0.33907	1.4473
				Unit of genome					Monocytes	CIV/mtDNAcn / mtDNAcn/CS		genome in relation to density	0.00274729	10	0.00127675	0.00209011	8	0.000949326	0.546539	-0.400141	1.49322
p value for chi^2:	0.00389242			Genome in relation to mtDNA density					CD8 naïve	CII / mtDNAcn/CS		yield per density	1.28303	7	0.321642	1.07409	5	0.39756	0.544699	-0.623446	1.71284
									CD4 naïve	CIV / mtDNAcn/CS		yield per density	0.243281	10	0.0876805	0.198181	8	0.0688648	0.5369	-0.409191	1.48299
									b cells	CI/CIV		enzymatic activity	1.81243	6	3.63885	0.326331	6	0.096694	0.532786	-0.618701	1.68427
									CD8 naïve	CI/CIV		enzymatic activity	0.63939	7	0.345412	0.484915	5	0.1318	0.508671	-0.65687	1.67421
									CD8+ naïve	CII/mtDNAcn / mtDNAcn/CS		genome in relation to density	0.00321221	7	0.00128803	0.00257022	5	0.00108103	0.489811	-0.674436	1.65406
									CD4 naïve	CII / mtDNAcn/CS		yield per density	1.30822	10	0.334517	1.11994	8	0.418914	0.479662	-0.463142	1.42247
									CD4+ naive	CII/mtDNAcn / mtDNAcn/CS		genome in relation to density	0.00420922	10	0.00164221	0.00346704	8	0.00122902	0.47893	-0.463834	1.42169
									CD4+ naive	CIV/mtDNAcn / mtDNAcn/CS		genome in relation to density	0.000780797	10	0.000355413	0.000627649	8	0.000231043	0.474658	-0.467875	1.41719
									CD4 memory	CIV / mtDNAcn/CS		yield per density	0.365388	10	0.210191	0.287655	10	0.0768818	0.4704	-0.418162	1.35896
									Natural killer	CIV / mtDNAcn/CS		yield per density	0.471512	6	0.18674	0.384842	8	0.159837	0.469823	-0.602889	1.54253
									CD8 memory	CII / mtDNAcn/CS		yield per density	1.98665	6	0.786045	1.69141	6	0.298645	0.458222	-0.688117	1.60456
									CD8 naïve	CI / mtDNAcn/CS		yield per density	0.119139	7	0.0422621	0.097734	5	0.0461158	0.450509	-0.711196	1.61221
									CD8 memory	CI/CII		enzymatic activity	0.0860429	6	0.0388677	0.0685922	6	0.0333381	0.444744	-0.700746	1.59023
									CD8+ naïve	CI/mtDNAcn / mtDNAcn/CS		genome in relation to density	0.000305121	7	0.000153193	0.000239824	5	0.000135776	0.411378	-0.748001	1.57076
									Monocyte	CII/mtDNAcn		genome	0.0950638	10	0.01672	0.0882709	8	0.0144204	0.410585	-0.528733	1.3499
									Natural killer	CIV/CII		enzymatic activity	0.175074	6	0.0632348	0.15412	8	0.0375813	0.390537	-0.677803	1.45888
									CD4 naïve	CII/mtDNAcn		genome	0.0561758	10	0.00899812	0.0523874	8	0.0101373	0.379227	-0.558682	1.31714
									Neutrophils	CIV/CII		enzymatic activity	0.366021	7	0.272657	0.277749	5	0.0872199	0.373172	-0.784136	1.53048
									Natural killer	CIV/CS		mito content	0.149448	6	0.0577401	0.130893	8	0.0427444	0.348272	-0.718061	1.41461
									CD4 memory	CI / mtDNAcn/CS		yield per density	0.174107	10	0.0666067	0.153731	10	0.0491806	0.33332	-0.549268	1.21591
									Natural killer	CIV/mtDNAcn		genome	0.0183019	6	0.00583021	0.0161268	8	0.00624241	0.33303	-0.732635	1.3987
									CD4+ CM&EM	CIV/mtDNAcn / mtDNAcn/CS		genome in relation to density	0.00113653	10	0.000697171	0.000950567	10	0.000298572	0.332093	-0.550451	1.21464
									Monocyte	CI/CS		mito content	0.0752205	10	0.0115485	0.0706035	8	0.0156617	0.325612	-0.610145	1.26137
									CD8 naïve	CII/mtDNAcn		genome	0.0467904	7	0.00764038	0.0439488	5	0.00867165	0.324992	-0.829987	1.47997
									CD4+ CM&EM	CII/mtDNAcn / mtDNAcn/CS		genome in relation to density	0.00669887	10	0.00246175	0.00599713	10	0.0016859	0.318542	-0.563522	1.20061
									CD8 memory	CIV/CII		enzymatic activity	0.177892	6	0.0275728	0.165949	6	0.0417624	0.311436	-0.826989	1.44986
									Natural killer	CII / mtDNAcn/CS		yield per density	2.91042	6	1.56994	2.52554	8	0.829718	0.299475	-0.764823	1.36377
									Neutrophils	CIV/CS		mito content	0.166935	7	0.107388	0.139538	5	0.0414344	0.289885	-0.863598	1.44337
									CD8 naïve	CI/mtDNAcn		genome	0.00432163	7	0.00122295	0.00395131	5	0.00116485	0.284765	-0.868514	1.43804
									Neutrophils	CI/mtDNAcn / mtDNAcn/CS		genome in relation to density	0.00152928	7	0.000407281	0.00134349	5	0.000844832	0.276312	-0.876637	1.42926
									CD8 memory	CI/CIV		enzymatic activity	0.491422	6	0.242005	0.424969	6	0.21737	0.266601	-0.870001	1.4032
									Monocyte	CIV/mtDNAcn		genome	0.0180462	10	0.00453231	0.0167992	8	0.00456868	0.261089	-0.672507	1.19469
									CD4 naïve	CIV/mtDNAcn		genome	0.0104885	10	0.00315491	0.00964749	8	0.00307497	0.256677	-0.676789	1.19014
									CD8+ CM&EM	CI/mtDNAcn / mtDNAcn/CS		genome in relation to density	0.000557956	7	0.00041693	0.00045929	6	0.00029059	0.25142	-0.843277	1.34612
									CD4+ naive	CI/mtDNAcn / mtDNAcn/CS		genome in relation to density	0.000328704	10	0.000161458	0.000292678	8	0.000107244	0.244458	-0.688658	1.17757
									Natural killer	CIV/mtDNAcn / mtDNAcn/CS		genome in relation to density	0.00248856	6	0.00149412	0.00213921	8	0.0012527	0.239151	-0.823051	1.30135
									CD8+ CM&EM	CIV/mtDNAcn / mtDNAcn/CS		genome in relation to density	0.00124774	7	0.000962449	0.00106593	6	0.000458384	0.218148	-0.875495	1.31179
									Neutrophils	CI / mtDNAcn/CS		yield per density	0.185569	7	0.0536401	0.170154	5	0.0868644	0.206515	-0.944092	1.35712
									CD4 naïve	CI / mtDNAcn/CS		yield per density	0.100432	10	0.0294586	0.093559	8	0.034384	0.206434	-0.725701	1.13857
									CD8 naïve	CIV / mtDNAcn/CS		yield per density	0.238777	7	0.195651	0.202893	5	0.0854983	0.205789	-0.944797	1.35638		No effect
									CD8+ naïve	CIV/mtDNAcn / mtDNAcn/CS		genome in relation to density	0.000596601	7	0.000525807	0.000505939	5	0.000270224	0.189414	-0.960723	1.33955
									CD4 memory	CIV/CII		enzymatic activity	0.164202	10	0.0531572	0.156903	10	0.0160355	0.178038	-0.700219	1.0563
									PBMCs	CI/mtDNAcn / mtDNAcn/CS		genome in relation to density	0.000920034	10	0.000202742	0.000863102	10	0.000391516	0.17489	-0.703307	1.05309
									all PBMCs	CI/mtDNAcn		genome	0.00692879	10	0.00137332	0.00662732	10	0.00217567	0.1587	-0.719202	1.0366
									CD4+ CM&EM	CI/mtDNAcn / mtDNAcn/CS		genome in relation to density	0.000544881	10	0.000258809	0.000508527	10	0.000183925	0.155074	-0.722765	1.03291
									b cells	mtDNAcn/CS		mito content	13.8751	6	3.51863	13.2869	6	3.59343	0.152637	-0.980595	1.28587
									Natural killer	CII/mtDNAcn / mtDNAcn/CS		genome in relation to density	0.0153638	6	0.0117982	0.0139854	8	0.00678533	0.13916	-0.920596	1.19892
									CD8 naïve	CI/CII		enzymatic activity	0.0919853	7	0.0206002	0.0895891	5	0.0159838	0.117058	-1.03153	1.26565
									CD8 memory	CI/mtDNAcn		genome	0.00547934	6	0.0018113	0.00524315	6	0.00237194	0.103279	-1.02906	1.23562
									b cells	CII / mtDNAcn/CS		yield per density	1.39697	6	0.469586	1.35493	6	0.296136	0.0988225	-1.03345	1.2311
									CD8+ CM&EM	CII/mtDNAcn / mtDNAcn/CS		genome in relation to density	0.00672907	7	0.0041708	0.00638792	6	0.00214011	0.0932743	-0.997738	1.18429
									all PBMCs	CI / mtDNAcn/CS		yield per density	0.376568	10	0.0886968	0.36213	10	0.200558	0.0891691	-0.787789	0.966127
									CD4 memory	CIV/mtDNAcn		genome	0.0108779	10	0.00456811	0.0106665	10	0.00249248	0.0550219	-0.821666	0.93171
									Natural killer	CII/mtDNAcn		genome	0.10739	6	0.0273119	0.1065	8	0.0332579	0.0267654	-1.03178	1.08531
									CD4 memory	CI/CIV		enzymatic activity	0.53823	10	0.184981	0.534714	10	0.0978226	0.0227582	-0.853793	0.899309
									CD4 naïve	CIV/CII		enzymatic activity	0.187645	10	0.0495253	0.186622	8	0.066428	0.0169357	-0.912773	0.946645
									Monocyte	CIV/CII		enzymatic activity	0.189909	10	0.0328824	0.18953	8	0.0347267	0.0107175	-0.918982	0.940417	Higher in men
									all PBMCs	CI/CS		mito content	0.0527447	10	0.0122596	0.0532221	10	0.017536	-0.0302191	-0.906792	0.846353
									PBMCs	CIV/mtDNAcn / mtDNAcn/CS		genome in relation to density	0.00150115	10	0.000410289	0.00152022	10	0.000437738	-0.0430571	-0.919681	0.833567
									B cells	CII/mtDNAcn / mtDNAcn/CS		genome in relation to density	0.00312802	6	0.00151189	0.00320812	6	0.000943744	-0.0586535	-1.19048	1.07318
									Neutrophils	CI/mtDNAcn		genome	0.00760485	7	0.00213581	0.00777756	5	0.0031475	-0.0615737	-1.20948	1.08633
									CD8 naïve	CIV/mtDNAcn		genome	0.00814437	7	0.00480466	0.00841381	5	0.00234703	-0.0620554	-1.20996	1.08585
									CD4 naïve	CI/mtDNAcn		genome	0.00431501	10	0.000990487	0.00437955	8	0.000926131	-0.063823	-0.993749	0.866103
									CD4 memory	CI/CII		enzymatic activity	0.0821209	10	0.0249492	0.083746	10	0.016609	-0.0734346	-0.950253	0.803383
									CD8 memory	CIV/mtDNAcn		genome	0.0122511	6	0.00458739	0.0126	6	0.00329268	-0.0806225	-1.21267	1.05142
									Natural killer	CII/CS		mito content	0.849968	6	0.117469	0.868879	8	0.264934	-0.0813895	-1.14032	0.977541
									PBMCs	CII/mtDNAcn / mtDNAcn/CS		genome in relation to density	0.0102895	10	0.00209208	0.010602	10	0.00439699	-0.0869256	-0.963862	0.790011
									b cells	CI / mtDNAcn/CS		yield per density	0.107973	6	0.0405263	0.111767	6	0.0333883	-0.0943004	-1.22651	1.03791
									CD4 naïve	CIV/CS		mito content	0.148962	10	0.0428768	0.154592	8	0.0605233	-0.104403	-1.03472	0.825915
									CD4 memory	CII/mtDNAcn		genome	0.0660093	10	0.0117537	0.067533	10	0.0127004	-0.119255	-0.996557	0.758046
									Natural killer	mtDNAcn/CS		mito content	8.35699	6	2.20712	8.70389	8	2.94377	-0.121205	-1.18066	0.938248
									all PBMCs	CIV / mtDNAcn/CS		yield per density	0.60422	10	0.117338	0.629617	10	0.252667	-0.123472	-1.00083	0.753885
									all PBMCs	CII / mtDNAcn/CS		yield per density	4.22106	10	0.987436	4.47977	10	2.49449	-0.130608	-1.00806	0.746849
									b cells	CII/CS		mito content	0.521837	6	0.0841958	0.546653	6	0.206095	-0.145471	-1.27855	0.98761
									b cells	CI/CII		enzymatic activity	0.0795761	6	0.0197271	0.0829478	6	0.0196644	-0.157976	-1.29133	0.975374
									B cells	CI/mtDNAcn / mtDNAcn/CS		genome in relation to density	0.000247066	6	0.000145155	0.000272236	6	0.000122859	-0.172732	-1.30643	0.960962
									b cells	CII/mtDNAcn		genome	0.0390973	6	0.00816054	0.0405209	6	0.00687453	-0.174119	-1.30785	0.959609
									b cells	CI/CS		mito content	0.0407963	6	0.00897145	0.0427592	6	0.0106658	-0.183802	-1.31777	0.95017
									CD8 memory	CI/CS		mito content	0.0590617	6	0.00894444	0.063514	6	0.0290039	-0.191438	-1.32561	0.942737		Small
									CD4 naïve	CII/CS		mito content	0.795094	10	0.121635	0.83068	8	0.213641	-0.201479	-1.1335	0.73054
									all PBMCs	CIV/CII		enzymatic activity	0.146046	10	0.0235452	0.153461	10	0.0380644	-0.224365	-1.10364	0.654911
									Natural killer	CI/mtDNAcn / mtDNAcn/CS		genome in relation to density	0.00101301	6	0.000603426	0.00116943	8	0.000575865	-0.247617	-1.31008	0.81485
									CD4 memory	CI/mtDNAcn		genome	0.00527098	10	0.00130536	0.00561115	10	0.00123988	-0.255908	-1.13601	0.624195
									Natural killer	CI / mtDNAcn/CS		yield per density	0.192085	6	0.0710272	0.214186	8	0.0800561	-0.268945	-1.33212	0.794234
									CD8 naïve	CIV/CII		enzymatic activity	0.173694	7	0.0880641	0.197273	5	0.0601391	-0.278591	-1.43163	0.874446
									b cells	CI/mtDNAcn		genome	0.00305772	6	0.000823754	0.00329429	6	0.000605638	-0.301959	-1.43997	0.836057
									Neutrophils	CII/CS		mito content	0.476541	7	0.084259	0.515352	5	0.15541	-0.30355	-1.45759	0.850495
									all PBMCs	CII/mtDNAcn		genome	0.0768259	10	0.00807047	0.0818714	10	0.0182338	-0.342713	-1.22565	0.540221
									CD4 naïve	mtDNAcn/CS		mito content	14.5807	10	3.64825	15.9728	8	3.7699	-0.358108	-1.29513	0.578915
									CD4 naïve	CI/CIV		enzymatic activity	0.435771	10	0.128019	0.488987	8	0.14373	-0.37506	-1.31279	0.562671
									all PBMCs	CIV/mtDNAcn		genome	0.0112119	10	0.00217421	0.0120852	10	0.00220799	-0.381688	-1.26616	0.50278
									CD8 memory	mtDNAcn/CS		mito content	11.4626	6	3.08815	12.8287	6	3.00816	-0.413543	-1.55716	0.730074
									CD4 memory	CIV/CS		mito content	0.109548	10	0.0355302	0.12422	10	0.0316803	-0.417436	-1.30345	0.468581
									CD8 naïve	CII/CS		mito content	0.724661	7	0.134358	0.800602	5	0.202052	-0.425216	-1.58539	0.734962
									b cells	CIV/CII		enzymatic activity	0.212098	6	0.132324	0.274578	6	0.120345	-0.455871	-1.60206	0.690319
									CD8 memory	CII/mtDNAcn		genome	0.0681755	6	0.0194383	0.0770336	6	0.0147412	-0.473858	-1.62121	0.673498
									CD4 naïve	CI/CII		enzymatic activity	0.0771796	10	0.014273	0.0842167	8	0.0136669	-0.478292	-1.42102	0.464437
									CD4 memory	mtDNAcn/CS		mito content	10.5467	10	2.31927	11.8962	10	2.87419	-0.49486	-1.3847	0.394977
									b cells	CIV/CS		mito content	0.110075	6	0.0632011	0.140224	6	0.0482068	-0.494999	-1.64378	0.653785
									CD8 naïve	CI/CS		mito content	0.0647903	7	0.00897245	0.0693961	5	0.00745603	-0.506053	-1.67141	0.659306
									all PBMCs	mtDNAcn/CS		mito content	7.60138	10	0.842372	8.36056	10	1.80539	-0.516118	-1.40711	0.374878
									Neutrophils	CI/CIV		enzymatic activity	0.286644	7	0.146105	0.397474	5	0.226692	-0.559922	-1.72922	0.609374
									CD8 naïve	mtDNAcn/CS		mito content	15.8967	7	4.1049	18.6258	5	4.80324	-0.572685	-1.74297	0.5976
									Natural killer	CI/mtDNAcn		genome	0.00742689	6	0.00177333	0.00885819	8	0.00254656	-0.589819	-1.67063	0.490993		Medium
									Neutrophils	CI/CII		enzymatic activity	0.0807891	7	0.024188	0.0991623	5	0.0324409	-0.610215	-1.78353	0.563102
									CD4 memory	CII/CS		mito content	0.682674	10	0.140294	0.791034	10	0.18665	-0.628538	-1.52644	0.269366
									CD4 naïve	CI/CS		mito content	0.0603263	10	0.00878893	0.0685807	8	0.015986	-0.630866	-1.58313	0.321393
									CD8 memory	CIV/CS		mito content	0.132428	6	0.0337962	0.156791	6	0.0362392	-0.641637	-1.80197	0.5187
									Natural killer	CI/CS		mito content	0.0606546	6	0.0188204	0.0720863	8	0.0143914	-0.648935	-1.73438	0.436515
									b cells	CIV / mtDNAcn/CS		yield per density	0.255662	6	0.155894	0.361971	6	0.137455	-0.667526	-1.8302	0.495146
									Neutrophils	CI/CS		mito content	0.0384729	7	0.0141573	0.0490121	5	0.0151583	-0.66769	-1.84601	0.510626
									CD8 naïve	CIV/CS		mito content	0.119227	7	0.0433992	0.149272	5	0.0314423	-0.709835	-1.89209	0.472418
									all PBMCs	CIV/CS		mito content	0.0847074	10	0.0148889	0.100358	10	0.0253845	-0.720292	-1.62479	0.184206
									Monocyte	CIV/CS		mito content	0.123306	10	0.0223412	0.141619	8	0.0257554	-0.72986	-1.68964	0.229916
									Monocyte	CII/CS		mito content	0.653735	10	0.0853964	0.768422	8	0.201554	-0.738442	-1.69892	0.222034
									b cells	CIV/mtDNAcn		genome	0.00757135	6	0.0043929	0.0107267	6	0.00336324	-0.744291	-1.9144	0.425818
									B cells	CIV/mtDNAcn / mtDNAcn/CS		genome in relation to density	0.000542665	6	0.00038388	0.000875232	6	0.000430618	-0.75234	-1.92327	0.418593
									all PBMCs	CII/CS		mito content	0.579931	10	0.0479154	0.663831	10	0.140127	-0.767312	-1.67552	0.140892
									Natural killer	CI/CII		enzymatic activity	0.0707588	6	0.0182093	0.0870886	8	0.0204109	-0.777858	-1.87487	0.319155		Large
									CD8 memory	CII/CS		mito content	0.754745	6	0.217184	0.977707	6	0.247332	-0.884005	-2.06957	0.301562
									Neutrophils	mtDNAcn/CS		mito content	5.01302	7	0.698976	6.76062	5	2.54928	-0.9482	-2.15691	0.26051
									Monocyte	mtDNAcn/CS		mito content	7.02508	10	1.21825	8.76486	8	2.14591	-0.981488	-1.96491	0.00193503
									Natural killer	CI/CIV		enzymatic activity	0.425995	6	0.110138	0.585846	8	0.165268	-1.02617	-2.15085	0.0985014
									CD4 memory	CI/CS		mito content	0.0535529	10	0.00772038	0.06428	10	0.0101529	-1.13907	-2.08401	-0.194141

## Sheet: 8b
Mitotype sex differences
*For raw mitotype data see source Figure 8 "Raw Mitotype data"
Neutrophils CII/(mtDNAcn/CS)			CD4+ CM & EM CI/CS
Women	Men		Women	Men
2.22196	1.67526		0.0632199	0.0594938
2.24661	2.0382		0.0474445	0.0847127
2.38971	1.66597		0.0380767	0.0663122
1.82327	0.935482		0.0602641	0.0595309
2.32747	2.11306		0.0476786	0.0678479
2.10691			0.0559676	0.0466738
3.1296			0.0508544	0.0717758
			0.0581419	0.0562278
			0.0531002	0.0678996
			0.0607806	0.0623253

## Sheet: 8c
Mitotype sex differences
Hedge's g values showing sex differences, for calculations see source data Figure 8a. Positive values represent effects higher in women compared to men.
*For raw mitotype data see source Figure 8 "Raw Mitotype data"
	Monocytes	Neutrophils	Natural killers	CD8+ CM & EM	CD8+ naive	CD4+ CM & EM	B cells	CD4+ naive	PBMCs
CI	1.35	-0.26	-0.64	0.48	0.26	0.02	-0.01	-0.11	0.14
CII	0.13	0.56	0.37	0.03	0.11	0.27	0.13	0.31	-0.24
CIV	0.1	0.53	0.65	0.39	-0.05	0.27	-0.53	0.36	-0.4
CS	0.89	0.81	0.39	1.55	0.71	0.86	0.2	0.43	0.15
mtDNAcn	-0.37	-0.73	0.1	0.58	-0.01	0.36	0.5	0.1	0.1
CI/CS	0.33	-0.67	-0.65	-0.19	-0.51	-1.14	-0.18	-0.63	-0.03
CII/CS	-0.74	-0.3	-0.08	-0.88	-0.43	-0.63	-0.15	-0.2	-0.77
CIV/CS	-0.73	0.29	0.35	-0.64	-0.71	-0.42	-0.49	-0.1	-0.72
mtDNAcn/CS	-0.98	-0.95	-0.12	-0.41	-0.57	-0.49	0.15	-0.36	-0.52
CI/CII	1.07	-0.61	-0.78	0.44	0.12	-0.07	-0.16	-0.48	0.55
CI/CIV	0.89	-0.56	-1.03	0.27	0.51	0.02	0.53	-0.38	0.58
CIV/CII	0.01	0.37	0.39	0.31	-0.28	0.18	-0.46	0.02	-0.22
CI/mtDNAcn	1.21	-0.06	-0.59	0.1	0.28	-0.26	-0.3	-0.06	0.16
CII/mtDNAcn	0.41	0.89	0.03	-0.47	0.32	-0.12	-0.17	0.38	-0.34
CIV/mtDNAcn	0.26	0.59	0.33	-0.08	-0.06	0.06	-0.74	0.26	-0.38
CI / mtDNAcn/CS	1.24	0.21	-0.27	0.56	0.45	0.33	-0.09	0.21	0.09
CII / mtDNAcn/CS	0.84	1.37	0.3	0.46	0.54	0.57	0.1	0.48	-0.13
CIV / mtDNAcn/CS	0.57	0.71	0.47	0.55	0.21	0.47	-0.67	0.54	-0.12
CI/mtDNAcn / mtDNAcn/CS	1.05	0.28	-0.25	0.25	0.41	0.16	-0.17	0.24	0.17
CII/mtDNAcn / mtDNAcn/CS	0.75	1.21	0.14	0.09	0.49	0.32	-0.06	0.48	-0.09
CIV/mtDNAcn / mtDNAcn/CS	0.55	0.69	0.24	0.22	0.19	0.33	-0.75	0.47	-0.04
*Absolute Hedge's g values are first transformed to Fishers Z, then averaged before transforming back to Hedge's g.
	Monocytes	Neutrophils	Natural killers	CD8+ CM & EM	CD8+ naive	CD4+ CM & EM	B cells	CD4+ naive	PBMCs
Average Hedge's g	0.71	0.58	0.41	0.41	0.38	0.37	0.32	0.31	0.36

## Sheet: 8d
Mitotype association with age
*For raw mitotype data see source Figure 8 "Raw Mitotype data"
Pie charts								*Spearman's r calculated in Prism (GraphPad 8)
Mitotypes by index									Celltype	Mitotype	Index	Spearman's r	Corr. with age	Corr. Strength
Mito content			Enzymatic activity						Neutrophil	CII/CS	Mito content	1.4643	Positive	Strong
Location	Expected	Observed	Location	Expected	Observed				CD8 CMEM	CII/CS	Mito content	1.4531
Up with age	18	24	Up with age	13.5	11				B cells	mtDNAcn/CS	Mito content	1.3143		Moderate
Down with age	18	12	Down with age	13.5	16				Neutrophil	mtDNAcn/CS	Mito content	1.2786
									NK	CIV/CII	Enzymatic activity	1.1336
p value for chi^2:	0.0455003		p value for chi^2:	0.335924					Neutrophil	CIV/CS	Mito content	1.0143
									B cells	CI/CS	Mito content	0.9143
									B cells	CII/CS	Mito content	0.9143
Unit of genome			Yield per mtDNA density						B cells	CIV/CS	Mito content	0.9143
Location	Expected	Observed	Location	Expected	Observed				CD4 CMEM	CII/CS	Mito content	0.8156
Up with age	13.5	9	Up with age	13.5	9				CD8 CMEM	mtDNAcn/CS	Mito content	0.80439
Down with age	13.5	18	Down with age	13.5	18				CD8 N	CII / mtDNAcn/CS	Yield per density	0.7728
									Monocyte	mtDNAcn/CS	Mito content	0.7369
p value for chi^2:	0.0832645		p value for chi^2:	0.0832645					CD4 N	CI/CS	Mito content	0.73554
									NK	CI/CII	Enzymatic activity	0.7019
									CD8 N	CIV / mtDNAcn/CS	Yield per density	0.6818
Genome in relation to density				Mitotype colour-coding					CD8 N	CII/mtDNAcn / mtDNAcn/CS	Genome in relation to mtDNA density	0.61818
Location	Expected	Observed		Yield per density					NK	mtDNAcn/CS	Mito content	0.60948
Up with age	13.5	7		Mito content					CD8 N	CIV/mtDNAcn	Unit of genome	0.5817		Weak
Down with age	13.5	20		Enzymatic activity					B cells	CIV/mtDNAcn	Unit of genome	0.5143
				Unit of genome					B cells	CIV/CII	Enzymatic activity	0.51429
p value for chi^2:	0.0123546			Genome in relation to mtDNA density					CD4 CMEM	CII/mtDNAcn	Unit of genome	0.49137
									CD8 CMEM	CII/mtDNAcn	Unit of genome	0.46411
									CD8 CMEM	CII / mtDNAcn/CS	Yield per density	0.46097
									CD8 N	CII/mtDNAcn	Unit of genome	0.4455
									CD8 N	CI/mtDNAcn / mtDNAcn/CS	Genome in relation to mtDNA density	0.4272
									CD8 N	CIV/mtDNAcn / mtDNAcn/CS	Genome in relation to mtDNA density	0.4272
									CD4 CMEM	CII / mtDNAcn/CS	Yield per density	0.425
									CD4 N	CI/CII	Enzymatic activity	0.4132
									CD8 N	CI / mtDNAcn/CS	Yield per density	0.40908
									NK	CII / mtDNAcn/CS	Yield per density	0.381
									Neutrophil	CI/CS	Mito content	0.36429
									CD8 CMEM	CI/CS	Mito content	0.35338
									CD4 CMEM	mtDNAcn/CS	Mito content	0.3407
									CD4 CMEM	CI / mtDNAcn/CS	Yield per density	0.3402
									CD8 CMEM	CIV/CS	Mito content	0.3375
									CD4 CMEM	CII/mtDNAcn / mtDNAcn/CS	Genome in relation to mtDNA density	0.30357
									CD4 N	CIV/CII	Enzymatic activity	0.29211
									CD4 N	mtDNAcn/CS	Mito content	0.2726
									PBMCs	CII/mtDNAcn	Unit of genome	0.25507
									CD8 N	CIV/CS	Mito content	0.2455
									NK	CII/CS	Mito content	0.2381
									CD8 N	CI/mtDNAcn	Unit of genome	0.2272
									PBMCs	mtDNAcn/CS	Mito content	0.22572
									Neutrophil	CI/CIV	Enzymatic activity	0.2071
									CD8 CMEM	CII/mtDNAcn / mtDNAcn/CS	Genome in relation to mtDNA density	0.1995
									CD4 N	CI/CIV	Enzymatic activity	0.1992
									CD8 N	CI/CII	Enzymatic activity	0.1908
									CD4 N	CII/CS	Mito content	0.1899
									CD4 N	CI/mtDNAcn	Unit of genome	0.1542
									NK	CIV/CS	Mito content	0.1477
									PBMCs	CII / mtDNAcn/CS	Yield per density	0.13453
									PBMCs	CII/CS	Mito content	0.0803
									Neutrophil	CI/mtDNAcn	Unit of genome	0.06429
									Monocyte	CIV/CII	Enzymatic activity	0.05923
									B cells	CIV / mtDNAcn/CS	Yield per density	0.0571
									B cells	CIV/mtDNAcn / mtDNAcn/CS	Genome in relation to mtDNA density	0.0571
									CD4 CMEM	CI/CIV	Enzymatic activity	0.0512
									CD8 N	CIV/CII	Enzymatic activity	0.0272
									PBMCs	CII/mtDNAcn / mtDNAcn/CS	Genome in relation to mtDNA density	0.00591
									Neutrophil	CII/mtDNAcn	Unit of genome	-0.0143	Negative	Weak
									Monocyte	CI/CII	Enzymatic activity	-0.0345
									Monocyte	CIV/CS	Mito content	-0.05256
									B cells	CI/CII	Enzymatic activity	-0.05714
									Monocyte	CI/CIV	Enzymatic activity	-0.06877
									CD4 N	CII/mtDNAcn / mtDNAcn/CS	Genome in relation to mtDNA density	-0.07
									CD4 N	CIV / mtDNAcn/CS	Yield per density	-0.0827
									CD4 N	CI / mtDNAcn/CS	Yield per density	-0.088
									CD4 N	CII / mtDNAcn/CS	Yield per density	-0.088
									CD8 N	CII/CS	Mito content	-0.0908
									PBMCs	CI / mtDNAcn/CS	Yield per density	-0.1221
									CD8 CMEM	CI/CIV	Enzymatic activity	-0.1269
									Neutrophil	CIV/mtDNAcn	Unit of genome	-0.13571
									CD4 CMEM	CIV/mtDNAcn / mtDNAcn/CS	Genome in relation to mtDNA density	-0.1477
									NK	CIV / mtDNAcn/CS	Yield per density	-0.1524
									CD4 CMEM	CIV/CS	Mito content	-0.1604
									PBMCs	CIV/mtDNAcn	Unit of genome	-0.1611
									PBMCs	CIV/CS	Mito content	-0.1664
									CD4 CMEM	CIV/mtDNAcn	Unit of genome	-0.1851
									CD4 N	CI/mtDNAcn / mtDNAcn/CS	Genome in relation to mtDNA density	-0.1879
									CD4 N	CII/mtDNAcn	Unit of genome	-0.2021
									Monocyte	CIV / mtDNAcn/CS	Yield per density	-0.2164
									CD4 N	CIV/CS	Mito content	-0.2222
									PBMCs	CIV/CII	Enzymatic activity	-0.2278
									B cells	CII/mtDNAcn	Unit of genome	-0.2286
									Monocyte	CII/CS	Mito content	-0.23574
									PBMCs	CIV / mtDNAcn/CS	Yield per density	-0.2511
									CD4 CMEM	CIV / mtDNAcn/CS	Yield per density	-0.2568
									NK	CI/CS	Mito content	-0.2619
									CD8 CMEM	CIV/mtDNAcn / mtDNAcn/CS	Genome in relation to mtDNA density	-0.2757
									CD4 N	CIV/mtDNAcn	Unit of genome	-0.27932
									Monocyte	CI/CS	Mito content	-0.28719
									CD8 CMEM	CIV/mtDNAcn	Unit of genome	-0.3117
									NK	CII/mtDNAcn	Unit of genome	-0.3381
									CD8 CMEM	CI/mtDNAcn	Unit of genome	-0.3411
									B cells	CI/CIV	Enzymatic activity	-0.34281
									CD4 CMEM	CI/CS	Mito content	-0.3649
									PBMCs	CI/CS	Mito content	-0.37249
									Neutrophil	CI/CII	Enzymatic activity	-0.4
									CD8 CMEM	CI / mtDNAcn/CS	Yield per density	-0.41058
									NK	CII/mtDNAcn / mtDNAcn/CS	Genome in relation to mtDNA density	-0.419
									PBMCs	CI/mtDNAcn	Unit of genome	-0.4219
									CD8 N	CI/CIV	Enzymatic activity	-0.4364
									CD4 CMEM	CI/mtDNAcn	Unit of genome	-0.4381
									PBMCs	CI/CII	Enzymatic activity	-0.439039
									CD8 CMEM	CIV / mtDNAcn/CS	Yield per density	-0.4471
									B cells	CI/mtDNAcn	Unit of genome	-0.4571
									PBMCs	CIV/mtDNAcn / mtDNAcn/CS	Genome in relation to mtDNA density	-0.4831
									PBMCs	CI/CIV	Enzymatic activity	-0.484802
									CD4 N	CIV/mtDNAcn / mtDNAcn/CS	Genome in relation to mtDNA density	-0.49567
									CD4 CMEM	CI/mtDNAcn / mtDNAcn/CS	Genome in relation to mtDNA density	-0.5164
									CD8 N	mtDNAcn/CS	Mito content	-0.5198
									NK	CIV/mtDNAcn / mtDNAcn/CS	Genome in relation to mtDNA density	-0.5286
									NK	CIV/mtDNAcn	Unit of genome	-0.5429
									NK	CI/CIV	Enzymatic activity	-0.5446
									Monocyte	CII / mtDNAcn/CS	Yield per density	-0.61527		Moderate
									CD8 CMEM	CI/mtDNAcn / mtDNAcn/CS	Genome in relation to mtDNA density	-0.6268
									CD8 N	CI/CS	Mito content	-0.6273
									Monocyte	CI / mtDNAcn/CS	Yield per density	-0.6426
									Monocyte	CIV/mtDNAcn	Unit of genome	-0.6725
									Neutrophil	CIV / mtDNAcn/CS	Yield per density	-0.6786
									B cells	CI/mtDNAcn / mtDNAcn/CS	Genome in relation to mtDNA density	-0.6858
									Monocyte	CI/mtDNAcn / mtDNAcn/CS	Genome in relation to mtDNA density	-0.7064
									Neutrophil	CII/mtDNAcn / mtDNAcn/CS	Genome in relation to mtDNA density	-0.7071
									Monocyte	CIV/mtDNAcn / mtDNAcn/CS	Genome in relation to mtDNA density	-0.7286
									Monocyte	CI/mtDNAcn	Unit of genome	-0.7347
									Monocyte	CII/mtDNAcn / mtDNAcn/CS	Genome in relation to mtDNA density	-0.7378
									CD8 CMEM	CI/CII	Enzymatic activity	-0.7977
									Neutrophil	CI / mtDNAcn/CS	Yield per density	-0.8071
									Neutrophil	CIV/mtDNAcn / mtDNAcn/CS	Genome in relation to mtDNA density	-0.8143
									PBMCs	CI/mtDNAcn / mtDNAcn/CS	Genome in relation to mtDNA density	-0.817061
									Neutrophil	CIV/CII	Enzymatic activity	-0.8286
									CD4 CMEM	CIV/CII	Enzymatic activity	-0.82887
									NK	CI / mtDNAcn/CS	Yield per density	-0.84283
									Neutrophil	CII / mtDNAcn/CS	Yield per density	-0.8571
									NK	CI/mtDNAcn	Unit of genome	-0.86189
									Monocyte	CII/mtDNAcn	Unit of genome	-0.8789
									B cells	CII / mtDNAcn/CS	Yield per density	-0.9142
									B cells	CI / mtDNAcn/CS	Yield per density	-0.9143
									CD8 CMEM	CIV/CII	Enzymatic activity	-0.92174
									B cells	CII/mtDNAcn / mtDNAcn/CS	Genome in relation to mtDNA density	-0.9715
									NK	CI/mtDNAcn / mtDNAcn/CS	Genome in relation to mtDNA density	-1.0047
									CD4 CMEM	CI/CII	Enzymatic activity	-1.1009
									Neutrophil	CI/mtDNAcn / mtDNAcn/CS	Genome in relation to mtDNA density	-1.2429

## Sheet: 8e
Mitotype association with age
*Spearman's r values calculated in Prism (GraphPad 8)
*For raw mitotype data see source Figure 8 "Raw Mitotype data"
Postively correlated with age			Negatively correlated with age
Age	B cell mtDNAcn/CS		Age	B CII/mtDNAcn / mtDNAcn/CS
32	10.838		32	0.00405592
23	8.72198		23	0.00563853
52	13.795		52	0.00307604
41	15.6951		41	0.0018752
57	18.1008		57	0.00160457
40	16.0999		40	0.00251785
40	9.69583		40	0.00326544
34	8.96086		34	0.00494666
25	13.4501		25	0.00319047
33	13.9952		33	0.00228031
56	18.7597		56	0.00246297
45	14.8597		45	0.00310286
Spearmans's r	0.75		Spearmans's r	-0.67
p value	0.007		p value	0.019

## Sheet: 8f
Mitotype association with age
Spearman's r values showing association with age. Positive value increase with age.
*For raw mitotype data see source Figure 8 "Raw Mitotype data"
	B cells	Neutrophils	CD4+ CM & EM	CD8+ CM & EM	Natural killers	Monocytes	CD8+ naive	CD4+ naive	PBMCs
CI	0.08757	0.1333	-0.08515	0.4787	-0.08609	-0.1323	-0.02988	0.3328	-0.1122
CII	0.03152	0.4965	0.5713	0.8528	-0.02857	-0.002067	0.3123	0.1819	0.14
CIV	0.1121	-0.1506	-0.04742	0.2201	0.2044	-0.07187	0.2386	0.2388	-0.02711
CS	-0.5814	-0.6305	0.06699	-0.08528	0.1604	0.01964	0.2491	0.07855	0.00828
mtDNAcn	0.5044	0.4939	0.3779	0.5055	0.4549	0.5313	-0.03509	0.5372	0.146
CI/CS	0.4273	0.4203	-0.1686	0.2861	-0.2396	-0.1116	-0.1895	0.2946	-0.2085
CII/CS	0.5079	0.7285	0.3862	0.5997	0.01978	-0.07545	0.2246	0.1643	0.0286
CIV/CS	0.4483	0.2417	-0.04441	0.2696	0.07253	-0.09716	0.1298	0.02481	-0.05796
mtDNAcn/CS	0.7461	0.648	0.2379	0.3384	0.2308	0.3276	-0.1891	0.2512	0.09785
CI/CII	-0.05604	0.1436	-0.557	-0.3109	0.37	-0.03101	-0.1719	0.09199	-0.2717
CI/CIV	-0.08056	0.3713	0.03914	0.05777	0.006608	0.003101	-0.1509	-0.008269	-0.1633
CIV/CII	0.2207	-0.4308	-0.557	-0.4787	0.4471	0	-0.003509	0.06822	-0.198
CI/mtDNAcn	-0.1856	0.01751	-0.2318	0.01376	-0.4286	-0.3204	0.0807	-0.06925	-0.3131
CII/mtDNAcn	-0.3152	-0.003503	0.2725	0.2448	-0.2352	-0.4165	0.2807	-0.1571	-0.000753
CIV/mtDNAcn	0.09807	-0.2207	-0.2153	-0.2118	-0.1736	-0.3618	0.1053	-0.1168	-0.1099
CI / mtDNAcn/CS	-0.606	-0.1821	-0.2469	-0.1403	-0.2879	-0.2274	0.1895	-0.09716	-0.06172
CII / mtDNAcn/CS	-0.5499	-0.4588	0.2439	0.2861	0.06374	-0.2842	0.3789	-0.03514	0.0414
CIV / mtDNAcn/CS	-0.07706	-0.4343	-0.201	-0.02476	-0.1121	-0.1819	0.1649	-0.01344	-0.07301
CI/mtDNAcn / mtDNAcn/CS	-0.5114	-0.3818	-0.2484	-0.2586	-0.4154	-0.3483	0.09825	-0.2202	-0.353
CII/mtDNAcn / mtDNAcn/CS	-0.6725	-0.4028	0.06925	0.09354	-0.2308	-0.3979	0.2456	-0.2078	-0.001505
CIV/mtDNAcn / mtDNAcn/CS	-0.1191	-0.4028	-0.2288	-0.1678	-0.2527	-0.3452	0.02105	-0.2966	-0.1468
*Absolute Spearman's r values are first transformed to Fishers Z, then averaged before transforming back to Spearman's r.
	B cells	Neutrophils	CD4+ CM & EM	CD8+ CM & EM	Natural killers	Monocytes	CD8+ naive	CD4+ naive	PBMCs
	0.376439	0.360213	0.254051	0.243932	0.22895	0.225208	0.165575	0.133661	0.134812

## Sheet: Raw Mitotype data
Individual mitochondrial features					CS activity									mtDNAcn									CI activity									CII activity									CIV activity
	Subject id	Age	Sex	Ethnicity	B cells	Neutrophils	Natural killers	Monocytes	CD8+ Naïve	CD4+ Naïve	CD8+ CM&EM	CD4+ CM&EM	PBMCs	B cells	Neutrophils	Natural killers	Monocytes	CD8+ Naïve	CD4+ Naïve	CD8+ CM&EM	CD4+ CM&EM	PBMCs	B cells	Neutrophils	Natural killers	Monocytes	CD8+ Naïve	CD4+ Naïve	CD8+ CM&EM	CD4+ CM&EM	PBMCs	B cells	Neutrophils	Natural killers	Monocytes	CD8+ Naïve	CD4+ Naïve	CD8+ CM&EM	CD4+ CM&EM	PBMCs	B cells	Neutrophils	Natural killers	Monocytes	CD8+ Naïve	CD4+ Naïve	CD8+ CM&EM	CD4+ CM&EM	PBMCs
	1	23	F	Asian	40.2926	NA	NA	41.8749	29.141	27.0296	23.5536	27.3244	47.6253	351.432	NA	NA	274.285	444.046	274.559	273.957	311.26	367.063	1.61093	NA	NA	3.48414	2.11224	1.36532	1.63835	1.64668	3.03303	17.2831	NA	NA	22.3216	16.8484	15.7717	9.61569	11.5594	26.8376	0.174371	NA	NA	3.91391	2.8198	2.03756	1.58188	2.17304	3.81006
	2	23	F	Asian	NA	23.0678	NA	37.3941	24.6856	21.9791	26.0536	28.8535	49.5	NA	116.471	NA	287.542	490.179	317.916	290.742	322.472	356.308	NA	1.01589	NA	2.45506	1.51912	1.18559	1.34992	1.6776	2.72133	NA	11.7504	NA	25.1509	19.2461	18.6351	20.2969	21.1362	26.5499	NA	2.72305	NA	4.90799	3.49499	3.13203	3.21055	4.20004	4.68321
	3	25	F	Asian	NA	23.5823	17.6288	32.5379	NA	NA	NA	NA	NA	NA	103.956	155.241	247.84	NA	NA	NA	NA	NA	NA	0.841711	1.55978	2.71951	NA	NA	NA	NA	NA	NA	9.79585	14.7708	26.1505	NA	NA	NA	NA	NA	NA	9.49407	4.2096	5.29523	NA	NA	NA	NA	NA
	4	27	F	White	NA	27.2894	NA	46.838	24.9918	22.3108	33.2006	35.4684	51.9901	NA	115.131	NA	227.202	292.307	215.585	209.278	249.344	327.983	NA	0.815662	NA	3.67197	1.69052	1.40236	1.96018	1.68278	2.53719	NA	9.47802	NA	25.3628	15.9858	14.2687	20.5619	18.3195	31.6807	NA	2.19556	NA	5.68464	2.74674	2.57128	4.43153	2.82041	5.12614
	5	32	F	White	37.8307	NA	NA	43.5952	36.4775	25.538	32.0168	40.1959	61.4562	410.008	NA	NA	322.931	391.235	304.527	370.793	311.956	470.179	1.27481	NA	NA	3.68074	1.97395	1.30946	1.60449	2.54118	3.75571	18.0231	NA	NA	30.7961	20.3051	21.6869	21.2419	25.154	33.8493	5.42429	NA	NA	5.3428	7.1961	5.26343	4.68192	6.3619	5.48733
	6	32	F	White	NA	26.091	37.4198	48.3805	24.827	25.8697	NA	40.5841	48.9559	NA	133.396	153.906	245.509	338.898	297.091	NA	341.659	409.387	NA	1.28412	1.38255	3.38236	1.83837	1.49078	NA	1.54531	3.57653	NA	12.2184	24.8977	31.2135	19.3022	18.3563	NA	24.6908	30.8319	NA	3.59952	3.29601	6.24778	1.37679	3.56454	NA	5.41232	4.8695
	7	40	F	White	32.7214	25.3918	NA	40.7169	NA	17.8464	22.8057	24.3012	73.3951	526.811	117.565	NA	317.331	NA	360.707	386.835	348.362	529.612	1.31446	0.708782	NA	2.80059	NA	1.15728	1.6484	1.47704	3.10784	21.3554	14.4912	NA	28.1434	NA	16.86	24.8392	20.9486	42.3964	3.1408	3.25987	NA	3.60348	NA	2.58817	4.07627	3.38924	4.75324
	8	41	F	White	32.4539	NA	23.091	NA	22.2936	21.2072	34.2938	28.9093	51.6483	509.369	NA	188.295	NA	462.578	352.695	377.531	381.692	373.588	1.20752	NA	1.23657	NA	1.59519	1.14137	1.75467	1.47016	1.5882	14.9915	NA	20.0467	NA	20.275	16.8485	28.8538	23.6468	28.6326	4.74015	NA	3.21519	NA	2.50465	4.18931	4.54748	3.59149	4.49693
	9	43	F	African American	NA	22.1192	23.5635	37.8181	NA	19.7899	27.3113	30.2595	40.1057	NA	118.912	245.375	311.634	NA	367.946	316.587	324.995	370.903	NA	0.457711	1.81794	3.61614	NA	1.45642	1.62391	1.69355	2.30836	NA	9.80153	24.2963	26.7947	NA	17.9396	24.105	23.4443	24.5012	NA	3.80079	4.27322	5.26556	NA	3.20728	3.97514	3.25915	3.92907
	10	52	F	White	39.8968	NA	29.2962	49.5247	29.2217	26.0095	NA	33.3913	74.7237	550.377	NA	273.041	335.111	565.766	404.895	NA	382.783	512.07	1.4107	NA	1.50281	2.93926	1.52398	1.54834	NA	1.59205	3.14119	23.3547	NA	24.0482	33.2461	24.3008	23.8639	NA	26.4302	37.6411	3.42323	NA	4.70465	5.29583	3.54351	2.84683	NA	1.98248	4.16766
	11	57	F	Asian	26.2607	22.8128	25.1724	40.4874	NA	22.6235	NA	34.6785	48.8477	475.339	143.612	236.244	334.462	NA	387.101	NA	344.997	402.335	1.53262	1.41112	1.42094	2.56198	NA	1.70269	NA	1.84144	2.59517	13.8057	13.2651	22.0504	22.8314	NA	17.1502	NA	23.3796	32.3772	4.85539	2.94798	2.23371	5.58193	NA	4.49109	NA	2.37404	3.88514
	12	24	M	Asian	NA	NA	19.6937	32.417	24.959	17.7774	22.9006	20.1964	43.6225	NA	NA	225.265	355.627	564.76	402.277	273.53	339.559	436.076	NA	NA	1.52665	2.52376	1.8529	1.32073	1.68974	1.37133	2.45301	NA	NA	24.5834	33.0721	28.2076	20.4471	19.622	19.5224	34.0547	NA	NA	3.10598	4.73875	2.70498	2.56201	4.4655	2.89178	4.29216
	13	25	M	White	35.0824	26.0819	NA	42.36	NA	24.3543	26.6385	31.172	55.1691	471.862	142.073	NA	290.791	NA	352.253	210.662	294.854	431.41	1.43758	0.735324	NA	3.14674	NA	1.61455	1.57961	2.11495	3.0405	20.2486	9.12545	NA	29.9801	NA	19.1743	15.5911	19.5561	38.872	6.17454	3.80599	NA	6.11787	NA	3.50102	2.74853	3.24907	5.07875
	14	26	M	Asian	NA	NA	21.2218	36.6507	19.3857	15.3905	18.963	24.5321	48.0395	NA	NA	178.948	248.602	398.274	274.891	227.449	252.288	379.77	NA	NA	1.64804	1.7398	1.25304	0.872585	0.936988	1.45951	3.48923	NA	NA	20.499	25.7405	14.159	11.713	20.2532	16.647	31.7782	NA	NA	2.06268	5.84928	3.16497	3.88773	3.79131	2.61984	5.42734
	15	29	M	African American	NA	NA	NA	29.1004	17.9874	14.7107	21.5201	21.6879	28.2424	NA	NA	NA	279.117	410.9	278.724	348.835	279.512	293.996	NA	NA	NA	2.75556	1.19353	1.44539	0.33623	1.83724	1.79232	NA	NA	NA	27.247	13.9385	15.4013	22.4549	19.5914	20.7617	NA	NA	NA	4.77432	3.447	3.36163	3.19278	3.41408	3.54798
	16	33	M	White	34.1142	26.6469	29.5726	46.7986	NA	28.3526	NA	40.4046	76.9139	477.435	126.404	184.603	312.648	NA	324.055	NA	383.56	435.376	1.17845	1.37887	1.37278	2.49309	NA	1.21426	NA	1.88584	3.36446	15.2366	9.66853	14.8983	21.3443	NA	12.76	NA	26.1868	39.5764	3.22234	1.78469	2.17446	3.8093	NA	1.64409	NA	3.6361	4.50742
	17	34	M	White	39.3436	NA	27.4426	42.7172	27.9846	27.236	NA	31.4952	94.8099	352.553	NA	198.484	302.017	415.888	315.722	NA	302.624	529.991	1.47683	NA	2.53447	2.69656	2.2358	1.82919	NA	1.87494	4.01829	15.6274	NA	23.2166	26.8519	22.0578	22.4	NA	17.9006	55.2524	3.00312	NA	3.04039	6.42108	4.22071	3.85264	NA	2.59699	6.34958
	18	40	M	White	36.6878	NA	26.6866	NA	28.343	17.7529	NA	28.8833	36.2258	355.719	NA	140.153	NA	347.256	277.385	NA	276.048	380.194	1.32179	NA	1.56212	NA	1.75325	1.35573	NA	1.91532	0.41	11.2625	NA	19.5549	NA	16.4207	12.7435	NA	19.6647	15.4287	5.69487	NA	3.3966	NA	3.74868	2.36367	NA	3.49986	3.15099
	19	45	M	White	34.518	20.1067	23.0669	NA	NA	23.4023	21.7337	26.5424	57.5564	512.927	104.516	193.359	NA	NA	356.546	340.013	316.776	428.966	1.52313	1.20102	1.9084	NA	NA	1.56218	2.06671	1.65426	3.31923	23.6498	10.9839	21.402	NA	NA	21.2877	21.3365	23.0023	40.4208	4.71069	3.1077	4.63575	NA	NA	3.16301	3.36192	4.04662	5.82281
	20	53	M	White	NA	16.5866	23.1307	32.2113	NA	NA	NA	25.4639	44.8676	NA	180.936	333.484	331.708	NA	NA	NA	427.992	389.777	NA	1.08905	1.56477	2.25951	NA	NA	NA	1.43178	2.76502	NA	10.2048	12.9876	21.9778	NA	NA	NA	20.4154	27.3409	NA	2.7998	2.47491	4.42192	NA	NA	NA	2.72272	6.14504
	21	56	M	Asian	22.4725	17.7987	20.1438	26.8447	NA	NA	20.9049	21.8931	36.3053	421.577	133.589	165.858	318.391	NA	NA	277.43	265.266	348.102	1.42347	0.707149	1.48699	2.25451	NA	NA	1.83696	1.5714	2.4703	19.4788	12.504	23.4664	27.2154	NA	NA	27.8228	25.5879	33.4566	4.5588	2.87326	3.47822	4.02013	NA	NA	2.91807	3.88754	4.49618
	Repeat-01	34	M	White	NA	19.7416	18.2251	NA	18.6582	15.4037	NA	NA	138.3	NA	94.1859	155.991	NA	358.63	255.174	NA	NA	262	NA	1.01437	1.43546	NA	1.78385	1.2692	NA	NA	3.5	NA	11.6519	18.0547	NA	18.2447	15.9554	NA	NA	85.19	NA	2.40691	3.13023	NA	2.43269	2.65198	NA	NA	13.52
	Repeat-02	34	M	White	NA	22.1369	20.7561	NA	19.4746	18.4185	NA	NA	155.41	NA	103.664	135.576	NA	420.863	350.506	NA	NA	262	NA	0.949188	1.40517	NA	1.46507	0.983278	NA	NA	2.25	NA	11.2027	17.011	NA	19.1364	17.7904	NA	NA	70.39	NA	3.01644	3.11392	NA	3.32475	0	NA	NA	17.91
	Repeat-03	34	M	White	NA	20.5391	18.7974	36.0467	19.2281	18.2911	NA	26.1098	176.29	NA	96.7877	162.804	291.415	375.076	284.845	NA	311.295	312	NA	0.64173	1.27872	2.90338	1.32283	1.33959	NA	2.01244	4.32	NA	11.6204	18.8741	27.2286	19.2436	17.0187	NA	22.459	87.4	NA	2.97364	3.22795	1.87425	5.18872	3.0452	NA	1.27272	15.91
	Repeat-04	34	M	White	NA	25.3075	19.2579	37.5319	20.0724	20.9385	NA	30.5412	155.77	NA	116.163	173.964	307.281	400.416	296.481	NA	328.648	364	NA	1.19005	1.92018	2.72873	1.11687	1.44101	NA	1.60776	3.17	NA	15.4381	20.9988	29.0972	18.9884	18.8409	NA	22.4674	91.81	NA	4.17537	1.22406	5.99624	1.31385	0.400554	NA	3.82471	18.73
	Repeat-05	34	M	White	NA	26.4338	21.5715	40.9798	22.8041	16.8725	NA	32.1962	191.9	NA	128.003	173.645	285.22	397.793	307.58	NA	299.225	344	NA	1.48671	1.82448	3.61988	1.89114	1.50437	NA	1.87655	4.47	NA	14.0279	17.0698	25.3117	19.2964	17.6213	NA	24.0019	88.88	NA	3.28963	4.79139	5.54413	2.17426	1.32112	NA	4.42702	14.84
	Repeat-06	34	M	White	NA	26.9463	24.0141	37.8454	19.3168	24.1385	NA	27.0655	222	NA	127.53	184.675	321.306	401.218	335.215	NA	343.741	364	NA	0.87601	1.25562	3.09073	1.52272	1.55762	NA	1.83903	4.38	NA	11.4319	21.4795	25.4474	17.7342	17.5627	NA	22.9878	105.65	NA	3.25788	2.53579	5.28684	4.30477	4.9374	NA	4.11415	17.05
	Repeat-07	34	M	White	NA	33.0746	24.4043	41.647	21.8247	21.2418	NA	29.8469	191.96	NA	159.458	179.757	313.434	410.703	335.655	NA	309.902	353	NA	1.50945	1.86304	3.41747	1.99815	1.35962	NA	1.98546	4.54	NA	13.8967	21.6084	31.6178	19.5798	19.8621	NA	23.0493	86.64	NA	3.53475	2.88965	5.02795	3.11626	3.74147	NA	3.78457	15.7
	Repeat-08	34	M	White	NA	29.5703	24.656	42.3389	19.4319	16.8907	NA	38.4235	211.44	NA	147.647	203.968	306.656	429.912	336.164	NA	324.239	346	NA	2.09077	1.41666	4.04556	1.73218	1.74667	NA	2.09838	11.41	NA	9.12858	20.8167	29.4295	18.0583	19.5708	NA	24.8325	71.24	NA	3.4713	3.80112	6.38784	2.70854	3.41413	NA	4.47397	15.49
	Repeat-09	34	M	White	NA	37.532	26.6593	61.2208	21.9997	23.6891	NA	45.349	258.75	NA	135.82	209.965	306.597	405.391	316.974	NA	337.958	380	NA	0.89127	1.21326	2.69121	1.50714	1.7065	NA	1.83224	11.16	NA	13.1799	20.1081	28.9949	15.3762	18.7797	NA	24.4493	101.13	NA	3.74675	3.84581	5.92651	3.78724	3.71799	NA	4.61122	16.26
RC enzyme activity per CS					CI/CS									CII/CS									CIV/CS									mtDNAcn/CS
	Subject id	Age	Sex	Ethnicity	B cells	Neutrophils	Natural killers	Monocytes	CD8+ Naïve	CD4+ Naïve	CD8+ CM&EM	CD4+ CM&EM	PBMCs	B cells	Neutrophils	Natural killers	Monocytes	CD8+ Naïve	CD4+ Naïve	CD8+ CM&EM	CD4+ CM&EM	PBMCs	B cells	Neutrophils	Natural killers	Monocytes	CD8+ Naïve	CD4+ Naïve	CD8+ CM&EM	CD4+ CM&EM	PBMCs	B cells	Neutrophils	Natural killers	Monocytes	CD8+ Naïve	CD4+ Naïve	CD8+ CM&EM	CD4+ CM&EM	PBMCs
	1	23	F	Asian	0.0399808	#VALUE!	#VALUE!	0.0832034	0.0724835	0.0505119	0.0695586	0.0602641	0.0636854	0.428939	#VALUE!	#VALUE!	0.533054	0.578167	0.583496	0.408248	0.423042	0.563515	0.0043276	#VALUE!	#VALUE!	0.0934667	0.0967639	0.0753823	0.0671608	0.0795276	0.0800009	8.72198	#VALUE!	#VALUE!	6.5501	15.2378	10.1577	11.6312	11.3913	7.70732
	2	23	F	Asian	#VALUE!	0.0440391	#VALUE!	0.0656538	0.0615387	0.0539415	0.0518132	0.0581419	0.0549763	#VALUE!	0.509387	#VALUE!	0.67259	0.779651	0.847856	0.779042	0.732534	0.536362	#VALUE!	0.118045	#VALUE!	0.13125	0.14158	0.1425	0.123229	0.145564	0.0946102	#VALUE!	5.04908	#VALUE!	7.68951	19.8569	14.4645	11.1594	11.1762	7.19813
	3	25	F	Asian	#VALUE!	0.0356924	0.0884791	0.08358	#VALUE!	#VALUE!	#VALUE!	#VALUE!	#VALUE!	#VALUE!	0.415389	0.837879	0.803694	#VALUE!	#VALUE!	#VALUE!	#VALUE!	#VALUE!	#VALUE!	0.402592	0.238792	0.162741	#VALUE!	#VALUE!	#VALUE!	#VALUE!	#VALUE!	#VALUE!	4.40821	8.80609	7.61698	#VALUE!	#VALUE!	#VALUE!	#VALUE!	#VALUE!
	4	27	F	White	#VALUE!	0.0298894	#VALUE!	0.0783973	0.0676427	0.0628554	0.0590406	0.0474445	0.0488013	#VALUE!	0.347315	#VALUE!	0.541501	0.639641	0.639539	0.619324	0.516502	0.609361	#VALUE!	0.0804547	#VALUE!	0.121368	0.109905	0.115248	0.133477	0.0795191	0.0985983	#VALUE!	4.2189	#VALUE!	4.85081	11.6961	9.66279	6.30345	7.03003	6.30857
	5	32	F	White	0.0336979	#VALUE!	#VALUE!	0.0844301	0.0541142	0.051275	0.050114	0.0632199	0.061112	0.476414	#VALUE!	#VALUE!	0.706411	0.556649	0.849203	0.663461	0.625786	0.550788	0.143383	#VALUE!	#VALUE!	0.122555	0.197275	0.206102	0.146234	0.158272	0.0892885	10.838	#VALUE!	#VALUE!	7.40749	10.7254	11.9245	11.5812	7.7609	7.65064
	6	32	F	White	#VALUE!	0.0492169	0.036947	0.0699116	0.0740472	0.0576265	#VALUE!	0.0380767	0.0730562	#VALUE!	0.468297	0.665362	0.645167	0.777469	0.709566	#VALUE!	0.608386	0.629788	#VALUE!	0.13796	0.0880818	0.129138	0.0554553	0.137788	#VALUE!	0.133361	0.0994671	#VALUE!	5.1127	4.11297	5.07454	13.6504	11.4841	#VALUE!	8.41852	8.36236
	7	40	F	White	0.0401713	0.0279138	#VALUE!	0.068782	#VALUE!	0.0648466	0.0722802	0.0607806	0.0423439	0.652644	0.570702	#VALUE!	0.691198	#VALUE!	0.944727	1.08917	0.862039	0.577646	0.0959863	0.128383	#VALUE!	0.088501	#VALUE!	0.145025	0.178739	0.139468	0.0647624	16.0999	4.63002	#VALUE!	7.79359	#VALUE!	20.2118	16.9622	14.3352	7.21591
	8	41	F	White	0.0372073	#VALUE!	0.0535519	#VALUE!	0.0715537	0.05382	0.0511659	0.0508544	0.0307503	0.461932	#VALUE!	0.868162	#VALUE!	0.90945	0.79447	0.84137	0.817967	0.554378	0.146058	#VALUE!	0.13924	#VALUE!	0.112348	0.197542	0.132604	0.124233	0.0870683	15.6951	#VALUE!	8.15449	#VALUE!	20.7493	16.6309	11.0087	13.2031	7.23332
	9	43	F	African American	#VALUE!	0.020693	0.0771508	0.0956194	#VALUE!	0.073594	0.0594592	0.0559676	0.0575568	#VALUE!	0.443124	1.0311	0.708516	#VALUE!	0.906504	0.882603	0.774776	0.610915	#VALUE!	0.171833	0.181349	0.139234	#VALUE!	0.162067	0.145549	0.107707	0.0979679	#VALUE!	5.37599	10.4134	8.24035	#VALUE!	18.5926	11.5918	10.7403	9.24815
	10	52	F	White	0.0353587	#VALUE!	0.0512973	0.0593494	0.0521522	0.0595298	#VALUE!	0.0476786	0.0420374	0.585377	#VALUE!	0.820866	0.671303	0.8316	0.917504	#VALUE!	0.791528	0.503737	0.0858022	#VALUE!	0.160589	0.106933	0.121263	0.109453	#VALUE!	0.059371	0.0557742	13.795	#VALUE!	9.32003	6.76653	19.3611	15.5672	#VALUE!	11.4635	6.85284
	11	57	F	Asian	0.0583617	0.0618566	0.0564484	0.0632784	#VALUE!	0.075262	#VALUE!	0.0531002	0.0531277	0.525716	0.581477	0.875975	0.563912	#VALUE!	0.758072	#VALUE!	0.674181	0.662819	0.184892	0.129225	0.0887366	0.137868	#VALUE!	0.198514	#VALUE!	0.0684584	0.0795358	18.1008	6.29524	9.38504	8.26089	#VALUE!	17.1106	#VALUE!	9.94842	8.23651
	12	24	M	Asian	#VALUE!	#VALUE!	0.0775199	0.077853	0.0742376	0.0742928	0.0737858	0.0678995	0.0562327	#VALUE!	#VALUE!	1.24829	1.02021	1.13016	1.15018	0.856835	0.966628	0.780669	#VALUE!	#VALUE!	0.157714	0.146181	0.108377	0.144116	0.194995	0.143183	0.0983933	#VALUE!	#VALUE!	11.4384	10.9704	22.6275	22.6285	11.9442	16.8128	9.99658
	13	25	M	White	0.0409773	0.0281929	#VALUE!	0.0742857	#VALUE!	0.0662944	0.0592982	0.0678479	0.0551124	0.577173	0.349877	#VALUE!	0.707745	#VALUE!	0.787305	0.585284	0.627362	0.704598	0.176001	0.145925	#VALUE!	0.144426	#VALUE!	0.143754	0.103179	0.10423	0.0920579	13.4501	5.4472	#VALUE!	6.86474	#VALUE!	14.4637	7.90821	9.45893	7.81977
	14	26	M	Asian	#VALUE!	#VALUE!	0.0776579	0.0474697	0.0646374	0.0566963	0.0494115	0.0594938	0.0726325	#VALUE!	#VALUE!	0.96594	0.702321	0.73038	0.761053	1.06804	0.678581	0.661502	#VALUE!	#VALUE!	0.0971961	0.159595	0.163263	0.252606	0.199932	0.106792	0.112977	#VALUE!	#VALUE!	8.43228	6.78302	20.5447	17.861	11.9944	10.284	7.90537
	15	29	M	African American	#VALUE!	#VALUE!	#VALUE!	0.0946915	0.0663536	0.0982546	0.015624	0.0847127	0.0634622	#VALUE!	#VALUE!	#VALUE!	0.936311	0.774904	1.04694	1.04344	0.903334	0.735125	#VALUE!	#VALUE!	#VALUE!	0.164064	0.191634	0.228516	0.148363	0.157418	0.125626	#VALUE!	#VALUE!	#VALUE!	9.59152	22.8437	18.9471	16.2097	12.8879	10.4097
	16	33	M	White	0.0345444	0.0517461	0.0464206	0.0532727	#VALUE!	0.042827	#VALUE!	0.0466738	0.0437432	0.446636	0.362839	0.503785	0.456089	#VALUE!	0.450047	#VALUE!	0.648114	0.514554	0.0944575	0.0669757	0.0735295	0.0813977	#VALUE!	0.0579872	#VALUE!	0.0899921	0.0586035	13.9952	4.74367	6.24235	6.68071	#VALUE!	11.4295	#VALUE!	9.49298	5.66056
	17	34	M	White	0.0375366	#VALUE!	0.0923552	0.063126	0.079894	0.0671605	#VALUE!	0.0595308	0.0423826	0.397202	#VALUE!	0.846004	0.628597	0.788214	0.822441	#VALUE!	0.56836	0.582771	0.0763306	#VALUE!	0.110791	0.150316	0.150823	0.141454	#VALUE!	0.0824566	0.0669717	8.96086	#VALUE!	7.23269	7.07016	14.8613	11.5921	#VALUE!	9.60858	5.59004
	18	40	M	White	0.0360282	#VALUE!	0.0585357	#VALUE!	0.0618582	0.0763667	#VALUE!	0.0663122	0.0113179	0.306982	#VALUE!	0.73276	#VALUE!	0.579356	0.717828	#VALUE!	0.680832	0.425905	0.155225	#VALUE!	0.127278	#VALUE!	0.132261	0.133143	#VALUE!	0.121172	0.0869819	9.69583	#VALUE!	5.25181	#VALUE!	12.2519	15.6248	#VALUE!	9.55737	10.4951
	19	45	M	White	0.0441258	0.0597324	0.0827334	#VALUE!	#VALUE!	0.0667532	0.0950924	0.0623253	0.0576693	0.685146	0.54628	0.927825	#VALUE!	#VALUE!	0.909643	0.981726	0.866626	0.702283	0.136471	0.15456	0.20097	#VALUE!	#VALUE!	0.135158	0.154687	0.152459	0.101167	14.8597	5.19809	8.38251	#VALUE!	#VALUE!	15.2355	15.6445	11.9347	7.45297
	20	53	M	White	#VALUE!	0.0656587	0.0676493	0.0701466	#VALUE!	#VALUE!	#VALUE!	0.0562278	0.0616262	#VALUE!	0.615244	0.56149	0.682302	#VALUE!	#VALUE!	#VALUE!	0.801737	0.609368	#VALUE!	0.168799	0.106997	0.137279	#VALUE!	#VALUE!	#VALUE!	0.106925	0.136959	#VALUE!	10.9086	14.4174	10.2979	#VALUE!	#VALUE!	#VALUE!	16.8078	8.68727
	21	56	M	Asian	0.0633429	0.0397304	0.0738184	0.0839831	#VALUE!	#VALUE!	0.0878722	0.0717758	0.0680425	0.866781	0.702522	1.16494	1.01381	#VALUE!	#VALUE!	1.33093	1.16877	0.921535	0.202861	0.161431	0.172669	0.149755	#VALUE!	#VALUE!	0.139588	0.177569	0.123843	18.7597	7.50553	8.23367	11.8605	#VALUE!	#VALUE!	13.2711	12.1164	9.58817
	Repeat-01	34	M	White	#VALUE!	0.0513823	0.0787625	#VALUE!	0.0956068	0.0823955	#VALUE!	#VALUE!	0.0253073	#VALUE!	0.590222	0.99065	#VALUE!	0.977839	1.03581	#VALUE!	#VALUE!	0.61598	#VALUE!	0.121921	0.171754	#VALUE!	0.130382	0.172165	#VALUE!	#VALUE!	0.0977585	#VALUE!	4.77093	8.55912	#VALUE!	19.2211	16.5658	#VALUE!	#VALUE!	1.89443
	Repeat-02	34	M	White	#VALUE!	0.0428781	0.0676992	#VALUE!	0.0752295	0.0533852	#VALUE!	#VALUE!	0.0144778	#VALUE!	0.506065	0.819569	#VALUE!	0.982632	0.965896	#VALUE!	#VALUE!	0.452931	#VALUE!	0.136263	0.150025	#VALUE!	0.170722	0	#VALUE!	#VALUE!	0.115244	#VALUE!	4.68284	6.53188	#VALUE!	21.6108	19.0301	#VALUE!	#VALUE!	1.68586
	Repeat-03	34	M	White	#VALUE!	0.0312442	0.0680267	0.0805449	0.0687967	0.0732373	#VALUE!	0.0770761	0.0245051	#VALUE!	0.565767	1.00408	0.75537	1.00081	0.930437	#VALUE!	0.860176	0.495774	#VALUE!	0.144779	0.171724	0.0519951	0.269851	0.166486	#VALUE!	0.0487449	0.090249	#VALUE!	4.71235	8.661	8.08436	19.5067	15.5729	#VALUE!	11.9225	1.76981
	Repeat-04	34	M	White	#VALUE!	0.0470236	0.0997088	0.0727043	0.0556419	0.068821	#VALUE!	0.0526426	0.0203505	#VALUE!	0.610022	1.0904	0.775267	0.945994	0.89982	#VALUE!	0.735642	0.589395	#VALUE!	0.164985	0.0635615	0.159764	0.0654557	0.01913	#VALUE!	0.125231	0.120241	#VALUE!	4.59004	9.03339	8.1872	19.9486	14.1596	#VALUE!	10.7608	2.33678
	Repeat-05	34	M	White	#VALUE!	0.0562428	0.0845782	0.0883333	0.0829299	0.089161	#VALUE!	0.0582849	0.0232934	#VALUE!	0.530681	0.791315	0.617663	0.846181	1.04438	#VALUE!	0.74549	0.463158	#VALUE!	0.124448	0.222117	0.135289	0.0953448	0.0783001	#VALUE!	0.137501	0.0773319	#VALUE!	4.84239	8.04975	6.96001	17.4439	18.2297	#VALUE!	9.2938	1.7926
	Repeat-06	34	M	White	#VALUE!	0.0325095	0.0522869	0.0816671	0.0788285	0.0645286	#VALUE!	0.0679475	0.0197297	#VALUE!	0.42425	0.894453	0.672403	0.918072	0.72758	#VALUE!	0.84934	0.475901	#VALUE!	0.120903	0.105596	0.139696	0.222851	0.204545	#VALUE!	0.152007	0.0768018	#VALUE!	4.73274	7.6903	8.48996	20.7704	13.8872	#VALUE!	12.7003	1.63964
	Repeat-07	34	M	White	#VALUE!	0.0456378	0.0763407	0.0820579	0.0915542	0.0640067	#VALUE!	0.0665216	0.0236508	#VALUE!	0.420161	0.885435	0.759185	0.89714	0.935046	#VALUE!	0.772253	0.451344	#VALUE!	0.106872	0.118407	0.120728	0.142786	0.176137	#VALUE!	0.1268	0.0817879	#VALUE!	4.82114	7.3658	7.52597	18.8183	15.8016	#VALUE!	10.3831	1.83892
	Repeat-08	34	M	White	#VALUE!	0.0707052	0.057457	0.0955519	0.0891411	0.10341	#VALUE!	0.054612	0.0539633	#VALUE!	0.308707	0.844287	0.695094	0.929313	1.15868	#VALUE!	0.646285	0.336928	#VALUE!	0.117392	0.154166	0.150874	0.139387	0.202131	#VALUE!	0.116438	0.0732596	#VALUE!	4.9931	8.27255	7.24291	22.1241	19.9023	#VALUE!	8.43857	1.6364
	Repeat-09	34	M	White	#VALUE!	0.0237469	0.04551	0.0439591	0.0685075	0.0720376	#VALUE!	0.0404031	0.0431304	#VALUE!	0.351164	0.754262	0.473612	0.698927	0.792759	#VALUE!	0.539137	0.390841	#VALUE!	0.0998282	0.144258	0.0968056	0.172149	0.15695	#VALUE!	0.101683	0.0628406	#VALUE!	3.61879	7.87589	5.00806	18.4271	13.3806	#VALUE!	7.45239	1.4686
RC enzyme ratios					CI/CII									CI/CIV									CIV/CII
	Subject id	Age	Sex	Ethnicity	B cells	Neutrophils	Natural killers	Monocytes	CD8+ Naïve	CD4+ Naïve	CD8+ CM&EM	CD4+ CM&EM	PBMCs	B cells	Neutrophils	Natural killers	Monocytes	CD8+ Naïve	CD4+ Naïve	CD8+ CM&EM	CD4+ CM&EM	PBMCs	B cells	Neutrophils	Natural killers	Monocytes	CD8+ Naïve	CD4+ Naïve	CD8+ CM&EM	CD4+ CM&EM	PBMCs
	1	23	F	Asian	0.0932084	#VALUE!	#VALUE!	0.156088	0.125368	0.0865677	0.170383	0.142454	0.113014	9.23855	#VALUE!	#VALUE!	0.890193	0.749076	0.670076	1.0357	0.757775	0.796058	0.0100891	#VALUE!	#VALUE!	0.175342	0.167363	0.129191	0.16451	0.18799	0.141968
	2	23	F	Asian	#VALUE!	0.0864551	#VALUE!	0.0976134	0.0789311	0.0636211	0.0665089	0.0793709	0.102498	#VALUE!	0.373069	#VALUE!	0.500217	0.434657	0.378536	0.420464	0.399425	0.581082	#VALUE!	0.23174	#VALUE!	0.195142	0.181594	0.168071	0.15818	0.198713	0.176393
	3	25	F	Asian	#VALUE!	0.0859253	0.105599	0.103995	#VALUE!	#VALUE!	#VALUE!	#VALUE!	#VALUE!	#VALUE!	0.0886565	0.370528	0.513578	#VALUE!	#VALUE!	#VALUE!	#VALUE!	#VALUE!	#VALUE!	0.969193	0.284995	0.202491	#VALUE!	#VALUE!	#VALUE!	#VALUE!	#VALUE!
	4	27	F	White	#VALUE!	0.0860583	#VALUE!	0.144778	0.105751	0.0982824	0.0953307	0.0918574	0.0800861	#VALUE!	0.371506	#VALUE!	0.645946	0.615463	0.545393	0.442327	0.596643	0.494951	#VALUE!	0.231647	#VALUE!	0.224133	0.171824	0.180205	0.215521	0.153957	0.161806
	5	32	F	White	0.0707324	#VALUE!	#VALUE!	0.11952	0.0972143	0.0603801	0.0755342	0.101025	0.110954	0.235019	#VALUE!	#VALUE!	0.688916	0.274308	0.248785	0.342698	0.399437	0.684433	0.300964	#VALUE!	#VALUE!	0.17349	0.354398	0.242701	0.22041	0.252918	0.16211
	6	32	F	White	#VALUE!	0.105098	0.0555292	0.108362	0.0952414	0.0812137	#VALUE!	0.0625864	0.116001	#VALUE!	0.356748	0.419462	0.54137	1.33526	0.418225	#VALUE!	0.285517	0.734476	#VALUE!	0.2946	0.132382	0.200162	0.071328	0.194187	#VALUE!	0.219204	0.157937
	7	40	F	White	0.0615516	0.0489113	#VALUE!	0.0995113	#VALUE!	0.0686406	0.0663626	0.0705079	0.0733043	0.41851	0.217427	#VALUE!	0.777189	#VALUE!	0.447141	0.404389	0.435803	0.653836	0.147073	0.224956	#VALUE!	0.12804	#VALUE!	0.15351	0.164106	0.161789	0.112114
	8	41	F	White	0.0805471	#VALUE!	0.0616842	#VALUE!	0.078678	0.0677432	0.0608126	0.0621717	0.0554682	0.254744	#VALUE!	0.384601	#VALUE!	0.636892	0.272449	0.385856	0.409347	0.353175	0.316188	#VALUE!	0.160385	#VALUE!	0.123534	0.248646	0.157605	0.15188	0.157056
	9	43	F	African American	#VALUE!	0.0466979	0.0748239	0.134957	#VALUE!	0.0811845	0.067368	0.0722372	0.0942141	#VALUE!	0.120425	0.425426	0.686753	#VALUE!	0.454098	0.408516	0.519631	0.587507	#VALUE!	0.387776	0.17588	0.196515	#VALUE!	0.178782	0.164909	0.139016	0.160362
	10	52	F	White	0.0604033	#VALUE!	0.0624916	0.0884092	0.0627131	0.0648823	#VALUE!	0.0602362	0.083451	0.412096	#VALUE!	0.319432	0.555014	0.430076	0.543883	#VALUE!	0.803063	0.753706	0.146576	#VALUE!	0.195634	0.159292	0.145819	0.119295	#VALUE!	0.0750081	0.110721
	11	57	F	Asian	0.111014	0.106378	0.0644407	0.112213	#VALUE!	0.0992808	#VALUE!	0.0787625	0.0801543	0.315653	0.478675	0.636135	0.458978	#VALUE!	0.379126	#VALUE!	0.775657	0.667973	0.351695	0.222235	0.1013	0.244485	#VALUE!	0.261867	#VALUE!	0.101543	0.119996
	12	24	M	Asian	#VALUE!	#VALUE!	0.0621011	0.0763111	0.0656879	0.0645926	0.0861143	0.0702438	0.0720314	#VALUE!	#VALUE!	0.491521	0.53258	0.684994	0.515507	0.378398	0.474216	0.571509	#VALUE!	#VALUE!	0.126345	0.143286	0.0958956	0.125299	0.227576	0.148126	0.126037
	13	25	M	White	0.0709966	0.0805795	#VALUE!	0.104961	#VALUE!	0.0842042	0.101315	0.108148	0.0782182	0.232824	0.193202	#VALUE!	0.514353	#VALUE!	0.461166	0.574712	0.650942	0.598671	0.304936	0.417075	#VALUE!	0.204064	#VALUE!	0.18259	0.176289	0.166141	0.130653
	14	26	M	Asian	#VALUE!	#VALUE!	0.0803962	0.0675898	0.0884983	0.0744971	0.0462638	0.0876738	0.109799	#VALUE!	#VALUE!	0.798982	0.297438	0.39591	0.224446	0.247141	0.557098	0.642899	#VALUE!	#VALUE!	0.100623	0.22724	0.223531	0.331916	0.187196	0.157376	0.170788
	15	29	M	African American	#VALUE!	#VALUE!	#VALUE!	0.101133	0.0856281	0.093849	0.0149736	0.0937778	0.0863284	#VALUE!	#VALUE!	#VALUE!	0.577163	0.346251	0.429968	0.105309	0.538137	0.505166	#VALUE!	#VALUE!	#VALUE!	0.175224	0.247301	0.21827	0.142187	0.174264	0.170891
	16	33	M	White	0.0773434	0.142614	0.0921436	0.116803	#VALUE!	0.095161	#VALUE!	0.0720148	0.0850117	0.365714	0.772609	0.631319	0.654475	#VALUE!	0.738559	#VALUE!	0.518643	0.746426	0.211486	0.184588	0.145954	0.178469	#VALUE!	0.128847	#VALUE!	0.138852	0.113892
	17	34	M	White	0.0945025	#VALUE!	0.109166	0.100424	0.101361	0.08166	#VALUE!	0.104741	0.072726	0.491763	#VALUE!	0.833599	0.419955	0.529722	0.474788	#VALUE!	0.721966	0.632843	0.192171	#VALUE!	0.130958	0.23913	0.191347	0.171993	#VALUE!	0.145078	0.11492
	18	40	M	White	0.117363	#VALUE!	0.0798838	#VALUE!	0.106771	0.106386	#VALUE!	0.0973988	0.0265738	0.232103	#VALUE!	0.459906	#VALUE!	0.467697	0.573569	#VALUE!	0.547255	0.130118	0.50565	#VALUE!	0.173696	#VALUE!	0.22829	0.18548	#VALUE!	0.177977	0.204229
	19	45	M	White	0.0644035	0.109344	0.0891693	#VALUE!	#VALUE!	0.0733839	0.0968625	0.0719173	0.0821169	0.323336	0.386467	0.411671	#VALUE!	#VALUE!	0.49389	0.614742	0.408801	0.57004	0.199185	0.282932	0.216603	#VALUE!	#VALUE!	0.148584	0.157566	0.175923	0.144055
	20	53	M	White	#VALUE!	0.10672	0.120482	0.102809	#VALUE!	#VALUE!	#VALUE!	0.0701325	0.101131	#VALUE!	0.388976	0.632255	0.51098	#VALUE!	#VALUE!	#VALUE!	0.525865	0.44996	#VALUE!	0.274361	0.190559	0.201199	#VALUE!	#VALUE!	#VALUE!	0.133366	0.224756
	21	56	M	Asian	0.0730783	0.056554	0.0633665	0.0828393	#VALUE!	#VALUE!	0.0660234	0.0614116	0.073836	0.312247	0.246114	0.427514	0.560804	#VALUE!	#VALUE!	0.629511	0.404213	0.549423	0.23404	0.229788	0.148221	0.147715	#VALUE!	#VALUE!	0.10488	0.151929	0.134388
	Repeat-01	34	M	White	#VALUE!	0.0870559	0.0795059	#VALUE!	0.0977735	0.0795467	#VALUE!	#VALUE!	0.0410846	#VALUE!	0.421441	0.458578	#VALUE!	0.733281	0.478585	#VALUE!	#VALUE!	0.258876	#VALUE!	0.206567	0.173375	#VALUE!	0.133337	0.166212	#VALUE!	#VALUE!	0.158704
	Repeat-02	34	M	White	#VALUE!	0.0847285	0.0826034	#VALUE!	0.0765592	0.0552702	#VALUE!	#VALUE!	0.0319648	#VALUE!	0.314672	0.451254	#VALUE!	0.440655	#DIV/0!	#VALUE!	#VALUE!	0.125628	#VALUE!	0.26926	0.183053	#VALUE!	0.17374	0	#VALUE!	#VALUE!	0.25444
	Repeat-03	34	M	White	#VALUE!	0.0552246	0.0677501	0.10663	0.0687412	0.0787128	#VALUE!	0.089605	0.0494279	#VALUE!	0.215806	0.396141	1.54909	0.254943	0.439902	#VALUE!	1.58122	0.271527	#VALUE!	0.255899	0.171025	0.0688339	0.269633	0.178933	#VALUE!	0.0566684	0.182037
	Repeat-04	34	M	White	#VALUE!	0.077085	0.0914423	0.0937797	0.0588184	0.0764831	#VALUE!	0.07156	0.0345278	#VALUE!	0.285017	1.5687	0.455074	0.850069	3.59755	#VALUE!	0.420363	0.169247	#VALUE!	0.270458	0.0582919	0.206076	0.0691925	0.0212598	#VALUE!	0.170234	0.204008
	Repeat-05	34	M	White	#VALUE!	0.105982	0.106883	0.143012	0.0980049	0.0853722	#VALUE!	0.0781834	0.0502925	#VALUE!	0.45194	0.380782	0.652922	0.869789	1.13871	#VALUE!	0.423887	0.301213	#VALUE!	0.234506	0.280693	0.219034	0.112677	0.0749728	#VALUE!	0.184444	0.166967
	Repeat-06	34	M	White	#VALUE!	0.0766282	0.0584569	0.121456	0.0858631	0.0886894	#VALUE!	0.0800003	0.0414576	#VALUE!	0.26889	0.49516	0.584607	0.353728	0.315474	#VALUE!	0.447002	0.256891	#VALUE!	0.28498	0.118057	0.207756	0.242738	0.28113	#VALUE!	0.178971	0.161382
	Repeat-07	34	M	White	#VALUE!	0.10862	0.0862184	0.108087	0.102051	0.068453	#VALUE!	0.0861397	0.0524007	#VALUE!	0.427033	0.644729	0.679694	0.641201	0.363391	#VALUE!	0.52462	0.289172	#VALUE!	0.254359	0.133728	0.159023	0.159156	0.188373	#VALUE!	0.164195	0.18121
	Repeat-08	34	M	White	#VALUE!	0.229036	0.0680539	0.137466	0.0959215	0.0892489	#VALUE!	0.0845014	0.160163	#VALUE!	0.602302	0.372696	0.633322	0.639523	0.511601	#VALUE!	0.46902	0.736604	#VALUE!	0.380268	0.182599	0.217055	0.149989	0.17445	#VALUE!	0.180166	0.217434
	Repeat-09	34	M	White	#VALUE!	0.0676234	0.0603371	0.0928167	0.098018	0.0908695	#VALUE!	0.0749402	0.110353	#VALUE!	0.237878	0.315476	0.454097	0.397953	0.458985	#VALUE!	0.397343	0.686347	#VALUE!	0.284278	0.191257	0.204398	0.246305	0.197979	#VALUE!	0.188603	0.160783
RC enzyme per mtDNA					CI/mtDNAcn									CII/mtDNAcn									CIV/mtDNAcn
	Subject id	Age	Sex	Ethnicity	B cells	Neutrophils	Natural killers	Monocytes	CD8+ Naïve	CD4+ Naïve	CD8+ CM&EM	CD4+ CM&EM	PBMCs	B cells	Neutrophils	Natural killers	Monocytes	CD8+ Naïve	CD4+ Naïve	CD8+ CM&EM	CD4+ CM&EM	PBMCs	B cells	Neutrophils	Natural killers	Monocytes	CD8+ Naïve	CD4+ Naïve	CD8+ CM&EM	CD4+ CM&EM	PBMCs
	1	23	F	Asian	0.00458391	#VALUE!	#VALUE!	0.0127026	0.00475681	0.00497276	0.00598034	0.00529036	0.00826297	0.0491791	#VALUE!	#VALUE!	0.081381	0.0379428	0.0574436	0.0350993	0.0371373	0.0731143	0.000496172	#VALUE!	#VALUE!	0.0142695	0.00635024	0.00742119	0.00577419	0.00698144	0.0103799
	2	23	F	Asian	#VALUE!	0.00872221	#VALUE!	0.0085381	0.00309911	0.00372924	0.00464302	0.00520232	0.00763757	#VALUE!	0.100887	#VALUE!	0.0874685	0.0392635	0.0586164	0.0698105	0.0655444	0.074514	#VALUE!	0.0233796	#VALUE!	0.0170688	0.00713001	0.00985175	0.0110426	0.0130245	0.0131437
	3	25	F	Asian	#VALUE!	0.0080968	0.0100475	0.0109728	#VALUE!	#VALUE!	#VALUE!	#VALUE!	#VALUE!	#VALUE!	0.0942307	0.0951477	0.105513	#VALUE!	#VALUE!	#VALUE!	#VALUE!	#VALUE!	#VALUE!	0.0913277	0.0271167	0.0213655	#VALUE!	#VALUE!	#VALUE!	#VALUE!	#VALUE!
	4	27	F	White	#VALUE!	0.00708464	#VALUE!	0.0161617	0.00578336	0.00650489	0.00936639	0.00674884	0.00773572	#VALUE!	0.0823237	#VALUE!	0.111631	0.0546884	0.0661857	0.0982516	0.0734708	0.0965925	#VALUE!	0.0190701	#VALUE!	0.0250202	0.00939676	0.011927	0.0211753	0.0113113	0.0156293
	5	32	F	White	0.00310925	#VALUE!	#VALUE!	0.0113979	0.00504543	0.00429998	0.00432718	0.00814595	0.00798783	0.0439579	#VALUE!	#VALUE!	0.0953644	0.0519001	0.0712151	0.0572877	0.0806332	0.0719924	0.0132297	#VALUE!	#VALUE!	0.0165447	0.0183933	0.0172839	0.0126268	0.0203936	0.0116707
	6	32	F	White	#VALUE!	0.00962642	0.00898305	0.0137769	0.00542455	0.00501792	#VALUE!	0.00452297	0.00873632	#VALUE!	0.091595	0.161772	0.127138	0.0569559	0.0617866	#VALUE!	0.0722676	0.0753123	#VALUE!	0.0269838	0.0214156	0.0254483	0.00406255	0.0119981	#VALUE!	0.0158413	0.0118946
	7	40	F	White	0.00249512	0.00602887	#VALUE!	0.00882545	#VALUE!	0.00320836	0.00426124	0.00423996	0.00586813	0.0405371	0.123261	#VALUE!	0.0886879	#VALUE!	0.0467414	0.0642114	0.0601345	0.0800517	0.00596192	0.0277283	#VALUE!	0.0113556	#VALUE!	0.00717528	0.0105375	0.00972908	0.00897494
	8	41	F	White	0.00237063	#VALUE!	0.00656716	#VALUE!	0.00344848	0.00323614	0.00464776	0.0038517	0.00425121	0.0294316	#VALUE!	0.106464	#VALUE!	0.0438303	0.0477707	0.0764276	0.0619527	0.0766423	0.00930591	#VALUE!	0.0170753	#VALUE!	0.00541455	0.011878	0.0120453	0.00940939	0.0120371
	9	43	F	African American	#VALUE!	0.00384914	0.00740883	0.0116038	#VALUE!	0.00395824	0.00512942	0.00521101	0.00622361	#VALUE!	0.0824264	0.0990169	0.0859813	#VALUE!	0.0487561	0.0761403	0.0721376	0.0660581	#VALUE!	0.031963	0.0174151	0.0168966	#VALUE!	0.00871671	0.0125562	0.0100283	0.0105932
	10	52	F	White	0.00256315	#VALUE!	0.00550398	0.00877102	0.00269365	0.00382406	#VALUE!	0.00415916	0.0061343	0.042434	#VALUE!	0.0880755	0.0992094	0.042952	0.0589383	#VALUE!	0.0690475	0.0735078	0.0062198	#VALUE!	0.0172305	0.0158032	0.0062632	0.00703104	#VALUE!	0.00517912	0.00813884
	11	57	F	Asian	0.00322427	0.00982592	0.00601473	0.00766	#VALUE!	0.00439856	#VALUE!	0.00533755	0.00645027	0.0290439	0.0923676	0.0933374	0.0682629	#VALUE!	0.0443043	#VALUE!	0.0677676	0.0804732	0.0102146	0.0205273	0.00945511	0.0166893	#VALUE!	0.0116018	#VALUE!	0.00688133	0.00965648
	12	24	M	Asian	#VALUE!	#VALUE!	0.00677715	0.00709667	0.00328086	0.00328315	0.00617752	0.00403855	0.00562519	#VALUE!	#VALUE!	0.109131	0.0929965	0.0499461	0.0508285	0.0717362	0.0574934	0.0780936	#VALUE!	#VALUE!	0.0137881	0.0133251	0.00478961	0.00636877	0.0163254	0.00851627	0.0098427
	13	25	M	White	0.00304662	0.00517567	#VALUE!	0.0108213	#VALUE!	0.0045835	0.00749831	0.0071729	0.00704782	0.0429122	0.0642306	#VALUE!	0.103099	#VALUE!	0.0544332	0.0740096	0.0663249	0.0901046	0.0130855	0.0267889	#VALUE!	0.0210387	#VALUE!	0.00993893	0.0130471	0.0110193	0.0117725
	14	26	M	Asian	#VALUE!	#VALUE!	0.0092096	0.00699831	0.00314618	0.0031743	0.00411955	0.00578508	0.00918775	#VALUE!	#VALUE!	0.114553	0.103541	0.0355508	0.0426097	0.0890447	0.0659842	0.0836776	#VALUE!	#VALUE!	0.0115267	0.0235287	0.00794671	0.0141428	0.0166688	0.0103843	0.0142911
	15	29	M	African American	#VALUE!	#VALUE!	#VALUE!	0.00987242	0.00290467	0.00518574	0.000963866	0.00657303	0.00609642	#VALUE!	#VALUE!	#VALUE!	0.0976186	0.0339219	0.0552563	0.064371	0.0700915	0.0706189	#VALUE!	#VALUE!	#VALUE!	0.0171051	0.00838892	0.0120608	0.0091527	0.0122144	0.0120681
	16	33	M	White	0.0024683	0.0109085	0.0074364	0.00797411	#VALUE!	0.00374707	#VALUE!	0.00491666	0.00772771	0.0319135	0.0764892	0.0807045	0.0682695	#VALUE!	0.0393761	#VALUE!	0.0682729	0.0909017	0.00674927	0.014119	0.0117791	0.012184	#VALUE!	0.00507349	#VALUE!	0.00947986	0.010353
	17	34	M	White	0.00418895	#VALUE!	0.0127691	0.0089285	0.00537598	0.00579365	#VALUE!	0.0061956	0.0075818	0.0443263	#VALUE!	0.116969	0.0889084	0.053038	0.0709484	#VALUE!	0.0591513	0.104252	0.00851822	#VALUE!	0.0153181	0.0212606	0.0101487	0.0122026	#VALUE!	0.00858156	0.0119805
	18	40	M	White	0.00371584	#VALUE!	0.0111458	#VALUE!	0.00504886	0.00488753	#VALUE!	0.00693833	0.0010784	0.0316612	#VALUE!	0.139525	#VALUE!	0.047287	0.0459415	#VALUE!	0.0712363	0.0405812	0.0160095	#VALUE!	0.024235	#VALUE!	0.0107952	0.00852126	#VALUE!	0.0126784	0.00828784
	19	45	M	White	0.00296949	0.0114912	0.00986977	#VALUE!	#VALUE!	0.00438142	0.00607834	0.00522218	0.00773776	0.0461076	0.105092	0.110686	#VALUE!	#VALUE!	0.0597055	0.0627522	0.0726138	0.0942285	0.00918392	0.0297341	0.0239749	#VALUE!	#VALUE!	0.00887126	0.00988763	0.0127744	0.0135741
	20	53	M	White	#VALUE!	0.00601898	0.0046922	0.00681175	#VALUE!	#VALUE!	#VALUE!	0.00334535	0.00709386	#VALUE!	0.0563999	0.0389453	0.0662565	#VALUE!	#VALUE!	#VALUE!	0.0477004	0.070145	#VALUE!	0.0154739	0.00742136	0.0133308	#VALUE!	#VALUE!	#VALUE!	0.00636162	0.0157655
	21	56	M	Asian	0.00337655	0.00529349	0.00896544	0.00708093	#VALUE!	#VALUE!	0.00662133	0.00592385	0.0070965	0.0462045	0.0936005	0.141485	0.0854779	#VALUE!	#VALUE!	0.100288	0.0964614	0.0961117	0.0108137	0.0215083	0.0209711	0.0126264	#VALUE!	#VALUE!	0.0105182	0.0146553	0.0129163
	Repeat-01	34	M	White	#VALUE!	0.0107699	0.00920218	#VALUE!	0.00497405	0.00497384	#VALUE!	#VALUE!	0.0133588	#VALUE!	0.123712	0.115742	#VALUE!	0.0508732	0.0625274	#VALUE!	#VALUE!	0.325153	#VALUE!	0.0255549	0.0200668	#VALUE!	0.00678329	0.0103928	#VALUE!	#VALUE!	0.0516031
	Repeat-02	34	M	White	#VALUE!	0.00915643	0.0103644	#VALUE!	0.0034811	0.00280531	#VALUE!	#VALUE!	0.00858779	#VALUE!	0.108068	0.125472	#VALUE!	0.0454694	0.0507564	#VALUE!	#VALUE!	0.268664	#VALUE!	0.0290984	0.022968	#VALUE!	0.00789984	0	#VALUE!	#VALUE!	0.0683588
	Repeat-03	34	M	White	#VALUE!	0.00663028	0.00785437	0.00996306	0.00352683	0.00470286	#VALUE!	0.00646474	0.0138462	#VALUE!	0.12006	0.115931	0.093436	0.0513059	0.0597471	#VALUE!	0.0721471	0.280128	#VALUE!	0.0307234	0.0198272	0.00643156	0.0138338	0.0106907	#VALUE!	0.00408847	0.0509936
	Repeat-04	34	M	White	#VALUE!	0.0102447	0.0110378	0.00888024	0.00278927	0.00486039	#VALUE!	0.00489206	0.00870879	#VALUE!	0.132901	0.120708	0.0946925	0.0474216	0.0635486	#VALUE!	0.0683631	0.252225	#VALUE!	0.0359441	0.00703629	0.0195139	0.00328122	0.00135103	#VALUE!	0.0116377	0.051456
	Repeat-05	34	M	White	#VALUE!	0.0116147	0.0105069	0.0126916	0.00475409	0.00489098	#VALUE!	0.00627138	0.0129942	#VALUE!	0.109591	0.0983031	0.0887446	0.0485087	0.0572901	#VALUE!	0.0802137	0.258372	#VALUE!	0.0256996	0.027593	0.0194381	0.0054658	0.0042952	#VALUE!	0.0147949	0.0431395
	Repeat-06	34	M	White	#VALUE!	0.00686907	0.00679907	0.00961926	0.00379523	0.00464664	#VALUE!	0.00535006	0.012033	#VALUE!	0.0896415	0.116309	0.0791998	0.044201	0.0523923	#VALUE!	0.0668755	0.290247	#VALUE!	0.0255461	0.0137311	0.0164542	0.0107292	0.0147291	#VALUE!	0.0119688	0.0468407
	Repeat-07	34	M	White	#VALUE!	0.00946618	0.0103642	0.0109033	0.00486518	0.00405064	#VALUE!	0.00640674	0.0128612	#VALUE!	0.0871497	0.120209	0.100875	0.0476739	0.0591741	#VALUE!	0.0743761	0.245439	#VALUE!	0.0221673	0.0160753	0.0160415	0.00758761	0.0111468	#VALUE!	0.0122122	0.0444759
	Repeat-08	34	M	White	#VALUE!	0.0141606	0.0069455	0.0131925	0.00402915	0.0051959	#VALUE!	0.00647171	0.0329769	#VALUE!	0.0618268	0.102059	0.095969	0.0420046	0.0582181	#VALUE!	0.076587	0.205896	#VALUE!	0.0235108	0.0186359	0.0208306	0.00630023	0.0101562	#VALUE!	0.0137984	0.0447688
	Repeat-09	34	M	White	#VALUE!	0.00656212	0.00577839	0.00877767	0.00371776	0.00538373	#VALUE!	0.00542149	0.0293684	#VALUE!	0.0970391	0.0957685	0.09457	0.0379293	0.0592468	#VALUE!	0.0723442	0.266132	#VALUE!	0.0275861	0.0183164	0.01933	0.0093422	0.0117296	#VALUE!	0.0136444	0.0427895
RC enzyme per mtDNA density					CI/(mtDNAcn/CS)									CII/(mtDNAcn/CS)									CIV/(mtDNAcn/CS)
	Subject id	Age	Sex	Ethnicity	B cells	Neutrophils	Natural killers	Monocytes	CD8+ Naïve	CD4+ Naïve	CD8+ CM&EM	CD4+ CM&EM	PBMCs	B cells	Neutrophils	Natural killers	Monocytes	CD8+ Naïve	CD4+ Naïve	CD8+ CM&EM	CD4+ CM&EM	PBMCs	B cells	Neutrophils	Natural killers	Monocytes	CD8+ Naïve	CD4+ Naïve	CD8+ CM&EM	CD4+ CM&EM	PBMCs
	1	23	F	Asian	0.184698	#VALUE!	#VALUE!	0.531921	0.138618	0.134412	0.140858	0.144556	0.393526	1.98156	#VALUE!	#VALUE!	3.40782	1.10569	1.55268	0.826714	1.01475	3.48209	0.0199921	#VALUE!	#VALUE!	0.597534	0.185052	0.200592	0.136003	0.190763	0.494344
	2	23	F	Asian	#VALUE!	0.201202	#VALUE!	0.319275	0.0765034	0.0819653	0.120968	0.150105	0.37806	#VALUE!	2.32724	#VALUE!	3.27081	0.969242	1.28834	1.81882	1.89119	3.68845	#VALUE!	0.539315	#VALUE!	0.638271	0.176009	0.216533	0.2877	0.375804	0.650614
	3	25	F	Asian	#VALUE!	0.190941	0.177125	0.357033	#VALUE!	#VALUE!	#VALUE!	#VALUE!	#VALUE!	#VALUE!	2.22218	1.67734	3.43318	#VALUE!	#VALUE!	#VALUE!	#VALUE!	#VALUE!	#VALUE!	2.15372	0.478034	0.695188	#VALUE!	#VALUE!	#VALUE!	#VALUE!	#VALUE!
	4	27	F	White	#VALUE!	0.193335	#VALUE!	0.756982	0.144537	0.14513	0.31097	0.23937	0.402181	#VALUE!	2.24656	#VALUE!	5.22858	1.36676	1.47666	3.26202	2.60589	5.02186	#VALUE!	0.52041	#VALUE!	1.1719	0.234842	0.266101	0.703033	0.401195	0.812568
	5	32	F	White	0.117625	#VALUE!	#VALUE!	0.496895	0.184045	0.109813	0.138542	0.327433	0.490901	1.66296	#VALUE!	#VALUE!	4.15743	1.89318	1.81869	1.83417	3.24112	4.42438	0.50049	#VALUE!	#VALUE!	0.721271	0.67094	0.441397	0.404269	0.819737	0.717238
	6	32	F	White	#VALUE!	0.251163	0.336144	0.666534	0.134675	0.129812	#VALUE!	0.183561	0.427694	#VALUE!	2.38981	6.05347	6.151	1.41404	1.5984	#VALUE!	2.93292	3.68698	#VALUE!	0.704036	0.801369	1.2312	0.100861	0.310388	#VALUE!	0.642907	0.582312
	7	40	F	White	0.0816439	0.153084	#VALUE!	0.359345	#VALUE!	0.0572576	0.0971804	0.103036	0.430692	1.32643	3.12983	#VALUE!	3.6111	#VALUE!	0.834165	1.46438	1.46134	5.8754	0.195082	0.704072	#VALUE!	0.462365	#VALUE!	0.128053	0.240314	0.236428	0.658716
	8	41	F	White	0.0769362	#VALUE!	0.151642	#VALUE!	0.0768793	0.0686295	0.159389	0.11135	0.219568	0.95517	#VALUE!	2.45836	#VALUE!	0.977138	1.01308	2.62099	1.79101	3.95844	0.302014	#VALUE!	0.394285	#VALUE!	0.12071	0.251899	0.41308	0.272019	0.621696
	9	43	F	African American	#VALUE!	0.0851398	0.174578	0.438833	#VALUE!	0.0783329	0.140091	0.157683	0.249602	#VALUE!	1.8232	2.33318	3.25165	#VALUE!	0.964876	2.07949	2.18285	2.64931	#VALUE!	0.706994	0.410359	0.638997	#VALUE!	0.172502	0.342927	0.303452	0.424849
	10	52	F	White	0.102262	#VALUE!	0.161245	0.434382	0.0787131	0.099462	#VALUE!	0.13888	0.458378	1.69298	#VALUE!	2.58027	4.91332	1.25513	1.53296	#VALUE!	2.30559	5.49277	0.24815	#VALUE!	0.504789	0.78265	0.183022	0.182874	#VALUE!	0.172938	0.608165
	11	57	F	Asian	0.0846717	0.224157	0.151405	0.310134	#VALUE!	0.0995109	#VALUE!	0.185098	0.315081	0.762714	2.10716	2.34953	2.76379	#VALUE!	1.00232	#VALUE!	2.35008	3.93093	0.268243	0.468286	0.238008	0.675705	#VALUE!	0.262474	#VALUE!	0.238634	0.471697
	12	24	M	Asian	#VALUE!	#VALUE!	0.133467	0.230053	0.081887	0.0583658	0.141469	0.0815643	0.245385	#VALUE!	#VALUE!	2.1492	3.01467	1.24661	0.9036	1.6428	1.16116	3.40664	#VALUE!	#VALUE!	0.271539	0.431959	0.119544	0.11322	0.373862	0.171998	0.429363
	13	25	M	White	0.106883	0.134991	#VALUE!	0.458392	#VALUE!	0.111628	0.199743	0.223593	0.388822	1.50546	1.67526	#VALUE!	4.36726	#VALUE!	1.32568	1.9715	2.06748	4.97099	0.45907	0.698707	#VALUE!	0.891202	#VALUE!	0.242056	0.347554	0.343492	0.649476
	14	26	M	Asian	#VALUE!	#VALUE!	0.195444	0.256493	0.0609911	0.0488541	0.0781187	0.14192	0.441375	#VALUE!	#VALUE!	2.43101	3.79485	0.689179	0.655785	1.68855	1.61873	4.01983	#VALUE!	#VALUE!	0.244617	0.862341	0.154053	0.217665	0.31609	0.254749	0.686539
	15	29	M	African American	#VALUE!	#VALUE!	#VALUE!	0.287291	0.0522475	0.0762858	0.0207425	0.142555	0.172177	#VALUE!	#VALUE!	#VALUE!	2.84074	0.610167	0.812857	1.38527	1.52014	1.99444	#VALUE!	#VALUE!	#VALUE!	0.497764	0.150895	0.177422	0.196967	0.264905	0.340833
	16	33	M	White	0.084204	0.290676	0.219914	0.373178	#VALUE!	0.106239	#VALUE!	0.198656	0.594368	1.0887	2.0382	2.38664	3.19492	#VALUE!	1.11642	#VALUE!	2.75854	6.9916	0.230246	0.376227	0.34834	0.570194	#VALUE!	0.143847	#VALUE!	0.38303	0.796286
	17	34	M	White	0.164808	#VALUE!	0.350418	0.3814	0.150444	0.157796	#VALUE!	0.195131	0.71883	1.74396	#VALUE!	3.20995	3.79792	1.48425	1.93235	#VALUE!	1.86298	9.88408	0.335138	#VALUE!	0.420368	0.908194	0.284006	0.332351	#VALUE!	0.270278	1.13587
	18	40	M	White	0.136326	#VALUE!	0.297444	#VALUE!	0.1431	0.0867676	#VALUE!	0.200402	0.0390657	1.16158	#VALUE!	3.72345	#VALUE!	1.34026	0.815594	#VALUE!	2.05754	1.47008	0.587353	#VALUE!	0.646749	#VALUE!	0.305967	0.151277	#VALUE!	0.366195	0.300233
	19	45	M	White	0.102501	0.231051	0.227665	#VALUE!	#VALUE!	0.102535	0.132105	0.138609	0.445357	1.59154	2.11306	2.55318	#VALUE!	#VALUE!	1.39725	1.36384	1.92734	5.42345	0.31701	0.597854	0.553026	#VALUE!	#VALUE!	0.207608	0.214895	0.339063	0.781274
	20	53	M	White	#VALUE!	0.0998343	0.108534	0.219415	#VALUE!	#VALUE!	#VALUE!	0.0851858	0.318284	#VALUE!	0.935482	0.900831	2.13421	#VALUE!	#VALUE!	#VALUE!	1.21464	3.14724	#VALUE!	0.256659	0.171661	0.429401	#VALUE!	#VALUE!	#VALUE!	0.161992	0.707361
	21	56	M	Asian	0.0758795	0.0942171	0.180598	0.190086	#VALUE!	#VALUE!	0.138418	0.129692	0.257641	1.03833	1.66597	2.85006	2.29463	#VALUE!	#VALUE!	2.0965	2.11184	3.48937	0.243011	0.382818	0.422439	0.338952	#VALUE!	#VALUE!	0.219882	0.320849	0.46893
	Repeat-01	34	M	White	#VALUE!	0.212615	0.167711	#VALUE!	0.0928067	0.0766155	#VALUE!	#VALUE!	1.84752	#VALUE!	2.44228	2.10941	#VALUE!	0.9492	0.963152	#VALUE!	#VALUE!	44.9686	#VALUE!	0.504495	0.365719	#VALUE!	0.126564	0.160088	#VALUE!	#VALUE!	7.1367
	Repeat-02	34	M	White	#VALUE!	0.202695	0.215125	#VALUE!	0.0677932	0.0516697	#VALUE!	#VALUE!	1.33463	#VALUE!	2.39229	2.60431	#VALUE!	0.885501	0.934858	#VALUE!	#VALUE!	41.7531	#VALUE!	0.644147	0.476726	#VALUE!	0.153847	0	#VALUE!	#VALUE!	10.6236
	Repeat-03	34	M	White	#VALUE!	0.13618	0.147641	0.359136	0.0678142	0.0860203	#VALUE!	0.168793	2.44094	#VALUE!	2.46594	2.17921	3.36806	0.986514	1.09284	#VALUE!	1.88375	49.3838	#VALUE!	0.631032	0.372699	0.231837	0.265997	0.195544	#VALUE!	0.106749	8.98966
	Repeat-04	34	M	White	#VALUE!	0.259268	0.212565	0.333292	0.0559872	0.10177	#VALUE!	0.149409	1.35657	#VALUE!	3.3634	2.32458	3.55399	0.951865	1.33061	#VALUE!	2.08789	39.2891	#VALUE!	0.909657	0.135504	0.732392	0.065862	0.0282886	#VALUE!	0.355429	8.01531
	Repeat-05	34	M	White	#VALUE!	0.30702	0.22665	0.520097	0.108413	0.0825231	#VALUE!	0.201915	2.49358	#VALUE!	2.8969	2.12054	3.63673	1.1062	0.966627	#VALUE!	2.58258	49.5816	#VALUE!	0.679339	0.595222	0.796569	0.124643	0.0724707	#VALUE!	0.476341	8.27848
	Repeat-06	34	M	White	#VALUE!	0.185096	0.163273	0.364045	0.0733118	0.112163	#VALUE!	0.144802	2.67132	#VALUE!	2.41551	2.79306	2.99735	0.853821	1.26467	#VALUE!	1.81002	64.4349	#VALUE!	0.688371	0.329739	0.622717	0.207255	0.355537	#VALUE!	0.323941	10.3986
	Repeat-07	34	M	White	#VALUE!	0.31309	0.252932	0.45409	0.106181	0.086043	#VALUE!	0.191221	2.46883	#VALUE!	2.88244	2.93362	4.20116	1.04047	1.25696	#VALUE!	2.21989	47.1145	#VALUE!	0.733177	0.392307	0.668081	0.165597	0.236778	#VALUE!	0.364494	8.5376
	Repeat-08	34	M	White	#VALUE!	0.418733	0.171248	0.558555	0.0782938	0.0877621	#VALUE!	0.248665	6.97263	#VALUE!	1.82824	2.51636	4.06322	0.816228	0.983341	#VALUE!	2.94274	43.5346	#VALUE!	0.695221	0.459486	0.881944	0.122425	0.171544	#VALUE!	0.530181	9.46591
	Repeat-09	34	M	White	#VALUE!	0.246289	0.154048	0.537376	0.0817896	0.127536	#VALUE!	0.245859	7.59908	#VALUE!	3.64207	2.55312	5.78965	0.834434	1.4035	#VALUE!	3.28073	68.8615	#VALUE!	1.03536	0.488302	1.18339	0.205526	0.277864	#VALUE!	0.618757	11.0718
RC enzyme per mtDNA rel. to mtDNA density					(CI/mtDNAcn)/(mtDNAcn/CS)									(CII/mtDNAcn)/(mtDNAcn/CS)									(CIV/mtDNAcn)/(mtDNAcn/CS)
	Subject id	Age	Sex	Ethnicity	B cells	Neutrophils	Natural killers	Monocytes	CD8+ Naïve	CD4+ Naïve	CD8+ CM&EM	CD4+ CM&EM	PBMCs	B cells	Neutrophils	Natural killers	Monocytes	CD8+ Naïve	CD4+ Naïve	CD8+ CM&EM	CD4+ CM&EM	PBMCs	B cells	Neutrophils	Natural killers	Monocytes	CD8+ Naïve	CD4+ Naïve	CD8+ CM&EM	CD4+ CM&EM	PBMCs
	1	23	F	Asian	0.000525558	#VALUE!	#VALUE!	0.0019393	0.000312171	0.000489555	0.000514163	0.000464422	0.00107209	0.00563853	#VALUE!	#VALUE!	0.0124244	0.00249004	0.00565517	0.00301768	0.00326015	0.00948634	5.68875e-05	#VALUE!	#VALUE!	0.00217851	0.000416742	0.000730596	0.000496439	0.000612875	0.00134675
	2	23	F	Asian	#VALUE!	0.00172748	#VALUE!	0.00111036	0.000156072	0.000257821	0.000416064	0.000465484	0.00106105	#VALUE!	0.0199813	#VALUE!	0.0113751	0.00197732	0.00405244	0.00625577	0.00586466	0.0103519	#VALUE!	0.00463046	#VALUE!	0.00221975	0.00035907	0.0006811	0.000989536	0.00116539	0.00182599
	3	25	F	Asian	#VALUE!	0.00183675	0.00114097	0.00144058	#VALUE!	#VALUE!	#VALUE!	#VALUE!	#VALUE!	#VALUE!	0.0213762	0.0108048	0.0138524	#VALUE!	#VALUE!	#VALUE!	#VALUE!	#VALUE!	#VALUE!	0.0207176	0.00307931	0.00280498	#VALUE!	#VALUE!	#VALUE!	#VALUE!	#VALUE!
	4	27	F	White	#VALUE!	0.00167926	#VALUE!	0.00333176	0.000494469	0.000673189	0.00148592	0.000960002	0.00122622	#VALUE!	0.0195131	#VALUE!	0.0230129	0.00467578	0.00684955	0.015587	0.010451	0.0153113	#VALUE!	0.00452015	#VALUE!	0.00515795	0.000803409	0.00123432	0.00335932	0.00160901	0.00247747
	5	32	F	White	0.000286885	#VALUE!	#VALUE!	0.00153871	0.000470419	0.000360601	0.000373638	0.00104961	0.00104407	0.00405592	#VALUE!	#VALUE!	0.0128741	0.00483899	0.00597218	0.00494661	0.0103897	0.00940999	0.00122069	#VALUE!	#VALUE!	0.00223352	0.00171493	0.00144945	0.00109028	0.00262773	0.00152546
	6	32	F	White	#VALUE!	0.00188285	0.00218408	0.00271491	0.000397392	0.000436943	#VALUE!	0.000537264	0.00104472	#VALUE!	0.0179152	0.0393321	0.0250541	0.00417248	0.00538017	#VALUE!	0.00858435	0.0090061	#VALUE!	0.00527781	0.00520686	0.00501488	0.000297614	0.00104476	#VALUE!	0.00188172	0.0014224
	7	40	F	White	0.000154978	0.00130213	#VALUE!	0.0011324	#VALUE!	0.000158737	0.000251219	0.000295773	0.000813221	0.00251785	0.0266222	#VALUE!	0.0113796	#VALUE!	0.00231258	0.00378555	0.00419489	0.0110938	0.000370308	0.00598881	#VALUE!	0.00145704	#VALUE!	0.000355005	0.000621232	0.000678686	0.00124377
	8	41	F	White	0.000151042	#VALUE!	0.000805343	#VALUE!	0.000166197	0.000194586	0.000422189	0.000291727	0.000587726	0.0018752	#VALUE!	0.0130559	#VALUE!	0.00211237	0.0028724	0.00694246	0.00469228	0.0105957	0.000592917	#VALUE!	0.00209397	#VALUE!	0.000260951	0.000714211	0.00109416	0.000712666	0.00166412
	9	43	F	African American	#VALUE!	0.000715988	0.000711472	0.00140817	#VALUE!	0.000212893	0.000442504	0.000485186	0.000672957	#VALUE!	0.0153323	0.00950863	0.0104342	#VALUE!	0.00262233	0.00656846	0.00671656	0.00714284	#VALUE!	0.0059455	0.00167237	0.00205047	#VALUE!	0.000468826	0.0010832	0.000933712	0.00114544
	10	52	F	White	0.000185803	#VALUE!	0.000590554	0.00129624	0.000139127	0.000245649	#VALUE!	0.000362817	0.000895146	0.00307604	#VALUE!	0.00945012	0.0146618	0.00221846	0.00378606	#VALUE!	0.00602323	0.0107266	0.000450873	#VALUE!	0.00184876	0.0023355	0.000323493	0.000451658	#VALUE!	0.000451791	0.00118766
	11	57	F	Asian	0.000178129	0.00156085	0.000640885	0.00092726	#VALUE!	0.000257067	#VALUE!	0.000536522	0.000783132	0.00160457	0.0146726	0.00994534	0.00826338	#VALUE!	0.00258929	#VALUE!	0.0068119	0.00977031	0.000564318	0.00326077	0.00100747	0.00202027	#VALUE!	0.000678051	#VALUE!	0.0006917	0.0011724
	12	24	M	Asian	#VALUE!	#VALUE!	0.000592491	0.000646894	0.000144994	0.000145089	0.000517196	0.000240206	0.000562712	#VALUE!	#VALUE!	0.00954075	0.00847707	0.00220732	0.00224621	0.00600592	0.00341961	0.00781204	#VALUE!	#VALUE!	0.00120542	0.00121464	0.000211672	0.000281449	0.0013668	0.000506534	0.000984607
	13	25	M	White	0.000226513	0.000950152	#VALUE!	0.00157637	#VALUE!	0.000316897	0.000948168	0.00075832	0.000901283	0.00319047	0.0117915	#VALUE!	0.0150186	#VALUE!	0.00376343	0.00935859	0.00701188	0.0115227	0.00097289	0.00491793	#VALUE!	0.00306476	#VALUE!	0.000687164	0.00164982	0.00116496	0.00150547
	14	26	M	Asian	#VALUE!	#VALUE!	0.00109218	0.00103174	0.000153139	0.000177722	0.000343456	0.000562532	0.00116222	#VALUE!	#VALUE!	0.013585	0.0152647	0.00173041	0.00238562	0.00742385	0.0064162	0.0105849	#VALUE!	#VALUE!	0.00136697	0.00346876	0.000386801	0.000791826	0.00138972	0.00100975	0.00180777
	15	29	M	African American	#VALUE!	#VALUE!	#VALUE!	0.00102929	0.000127154	0.000273696	5.94622e-05	0.000510015	0.000585645	#VALUE!	#VALUE!	#VALUE!	0.0101776	0.00148495	0.00291635	0.00397114	0.00543855	0.00678392	#VALUE!	#VALUE!	#VALUE!	0.00178335	0.00036723	0.00063655	0.000564643	0.000947741	0.00115931
	16	33	M	White	0.000176367	0.00229958	0.00119128	0.0011936	#VALUE!	0.000327843	#VALUE!	0.000517926	0.00136519	0.00228031	0.0161245	0.0129285	0.0102189	#VALUE!	0.00344514	#VALUE!	0.00719194	0.0160588	0.000482255	0.00297639	0.00188697	0.00182376	#VALUE!	0.000443896	#VALUE!	0.000998617	0.00182896
	17	34	M	White	0.000467472	#VALUE!	0.00176547	0.00126284	0.000361743	0.000499794	#VALUE!	0.000644799	0.00135631	0.00494666	#VALUE!	0.0161723	0.0125752	0.00356886	0.00612042	#VALUE!	0.0061561	0.0186495	0.000950603	#VALUE!	0.00211789	0.00300709	0.000682892	0.00105267	#VALUE!	0.000893115	0.00214319
	18	40	M	White	0.000383241	#VALUE!	0.00212228	#VALUE!	0.000412088	0.000312806	#VALUE!	0.000725967	0.000102752	0.00326544	#VALUE!	0.0265671	#VALUE!	0.00385956	0.00294029	#VALUE!	0.00745355	0.00386666	0.00165117	#VALUE!	0.0046146	#VALUE!	0.0008811	0.000545367	#VALUE!	0.00132656	0.000789684
	19	45	M	White	0.000199835	0.00221067	0.00117742	#VALUE!	#VALUE!	0.00028758	0.000388529	0.000437562	0.00103821	0.00310286	0.0202175	0.0132044	#VALUE!	#VALUE!	0.00391884	0.00401114	0.00608424	0.0126431	0.000618041	0.0057202	0.0028601	#VALUE!	#VALUE!	0.000582276	0.00063202	0.00107036	0.0018213
	20	53	M	White	#VALUE!	0.000551765	0.000325454	0.000661471	#VALUE!	#VALUE!	#VALUE!	0.000199036	0.000816581	#VALUE!	0.00517022	0.00270127	0.006434	#VALUE!	#VALUE!	#VALUE!	0.002838	0.00807446	#VALUE!	0.00141851	0.00051475	0.00129452	#VALUE!	#VALUE!	#VALUE!	0.000378493	0.00181479
	21	56	M	Asian	0.00017999	0.000705278	0.00108888	0.000597019	#VALUE!	#VALUE!	0.000498929	0.000488911	0.000740131	0.00246297	0.0124709	0.0171838	0.00720695	#VALUE!	#VALUE!	0.00755685	0.00796122	0.010024	0.000576433	0.00286565	0.002547	0.00106458	#VALUE!	#VALUE!	0.000792566	0.00120954	0.00134711
	Repeat-01	34	M	White	#VALUE!	0.00225739	0.00107513	#VALUE!	0.000258781	0.000300248	#VALUE!	#VALUE!	0.0070516	#VALUE!	0.0259304	0.0135227	#VALUE!	0.00264674	0.00377449	#VALUE!	#VALUE!	0.171636	#VALUE!	0.00535637	0.00234449	#VALUE!	0.000352908	0.000627367	#VALUE!	#VALUE!	0.0272393
	Repeat-02	34	M	White	#VALUE!	0.00195532	0.00158675	#VALUE!	0.000161081	0.000147415	#VALUE!	#VALUE!	0.005094	#VALUE!	0.0230774	0.0192092	#VALUE!	0.00210401	0.00266717	#VALUE!	#VALUE!	0.159363	#VALUE!	0.00621383	0.0035163	#VALUE!	0.00036555	0	#VALUE!	#VALUE!	0.0405482
	Repeat-03	34	M	White	#VALUE!	0.001407	0.000906866	0.00123239	0.000180801	0.00030199	#VALUE!	0.000542229	0.00782352	#VALUE!	0.0254778	0.0133855	0.0115576	0.00263017	0.0038366	#VALUE!	0.00605133	0.158281	#VALUE!	0.00651975	0.00228925	0.000795556	0.000709182	0.000686493	#VALUE!	0.000342919	0.028813
	Repeat-04	34	M	White	#VALUE!	0.00223194	0.00122189	0.00108465	0.000139823	0.000343259	#VALUE!	0.000454618	0.00372684	#VALUE!	0.0289542	0.0133624	0.0115659	0.00237719	0.00448803	#VALUE!	0.00635296	0.107937	#VALUE!	0.00783089	0.00077892	0.00238346	0.000164484	9.54145e-05	#VALUE!	0.00108149	0.0220201
	Repeat-05	34	M	White	#VALUE!	0.00239854	0.00130525	0.0018235	0.000272536	0.000268298	#VALUE!	0.000674792	0.00724879	#VALUE!	0.0226315	0.012212	0.0127506	0.00278084	0.00314269	#VALUE!	0.00863089	0.144133	#VALUE!	0.00530721	0.00342781	0.00279283	0.000313336	0.000235616	#VALUE!	0.00159192	0.0240653
	Repeat-06	34	M	White	#VALUE!	0.0014514	0.00088411	0.00113302	0.000182723	0.0003346	#VALUE!	0.000421254	0.00733879	#VALUE!	0.0189407	0.0151241	0.00932865	0.00212807	0.00377272	#VALUE!	0.00526566	0.177019	#VALUE!	0.00539774	0.0017855	0.00193808	0.000516564	0.00106063	#VALUE!	0.000942399	0.0285677
	Repeat-07	34	M	White	#VALUE!	0.00196347	0.00140707	0.00144876	0.000258535	0.000256344	#VALUE!	0.000617036	0.00699386	#VALUE!	0.0180766	0.0163199	0.0134036	0.00253339	0.00374482	#VALUE!	0.0071632	0.133469	#VALUE!	0.00459794	0.00218243	0.00213149	0.000403205	0.000705421	#VALUE!	0.00117616	0.0241858
	Repeat-08	34	M	White	#VALUE!	0.00283603	0.000839584	0.00182143	0.000182116	0.00026107	#VALUE!	0.00076692	0.0201521	#VALUE!	0.0123825	0.012337	0.0132501	0.0018986	0.00292519	#VALUE!	0.00907583	0.125823	#VALUE!	0.00470865	0.00225273	0.002876	0.000284768	0.000510299	#VALUE!	0.00163515	0.0273581
	Repeat-09	34	M	White	#VALUE!	0.00181335	0.000733681	0.00175271	0.000201755	0.000402354	#VALUE!	0.000727483	0.0199976	#VALUE!	0.0268154	0.0121597	0.0188836	0.00205835	0.00442782	#VALUE!	0.00970751	0.181215	#VALUE!	0.00762301	0.00232563	0.00385977	0.000506982	0.000876616	#VALUE!	0.00183087	0.0291363
