# Supplementary material for: Mitochondrial phenotypes in purified human immune cell subtypes and cell mixtures
Source: eLife. 2021 Oct 26;10:e70899. doi: 10.7554/eLife.70899 (PMC8612706; doi:10.7554/eLife.70899)
Supplement: Figure 9—source data 1. [file elife-70899-fig9-data1.xlsx]

## Sheet: 9b
*Spearman's r correlations adjusted for sex and age, calculated in Prism (GraphPad 8)
	CS activity									mtDNAcn									CI activity									CII activity									CIV activity									MHI
	B cells	Neutrophils	Natural killers	Monocytes	CD8+ Naïve	CD4+ Naïve	CD8+ CM&EM	CD4+ CM&EM	PBMCs	B cells	Neutrophils	Natural killers	Monocytes	CD8+ Naïve	CD4+ Naïve	CD8+ CM&EM	CD4+ CM&EM	PBMCs	B cells	Neutrophils	Natural killers	Monocytes	CD8+ Naïve	CD4+ Naïve	CD8+ CM&EM	CD4+ CM&EM	PBMCs	B cells	Neutrophils	Natural killers	Monocytes	CD8+ Naïve	CD4+ Naïve	CD8+ CM&EM	CD4+ CM&EM	PBMCs	B cells	Neutrophils	Natural killers	Monocytes	CD8+ Naïve	CD4+ Naïve	CD8+ CM&EM	CD4+ CM&EM	PBMCs	B cells	Neutrophils	Natural killers	Monocytes
Testosterone	0.328671	-0.363636	-0.0824176	-0.181373	0.524476	-0.214765	-0.0604396	-0.171429	-0.160902	-0.643357	0.481818	0.379121	0.132353	-0.104895	-0.118679	-0.0494505	0.186466	0.0390977	0.101755	-0.118451	0.032967	-0.186389	0.524476	-0.10635	0.225585	-0.388262	-0.161715	-0.335664	-0.0730601	0.0934066	-0.122549	0.265734	-0.00722394	0.236264	-0.412185	-0.231579	0.00699301	-0.390909	-0.137363	-0.122549	0.027972	-0.172343	0.467033	-0.243701	0.162406	-0.125874	-0.227273	-0.159341	-0.235294
Estradiol	-0.013986	-0.1	-0.489011	-0.213235	-0.440559	-0.21683	0.335165	-0.362406	-0.123308	0.181818	-0.5	0.307692	-0.181373	0.216783	-0.0340557	-0.148352	0.0887218	-0.372932	-0.084211	-0.396356	-0.208791	0.160638	-0.0909091	-0.247806	0.209079	-0.437923	-0.373073	0.111888	-0.616445	-0.115385	-0.321078	-0.188811	-0.195046	0.175824	-0.164724	-0.109774	-0.426573	0.0181818	0.17033	-0.394608	-0.538462	-0.368421	0.285714	-0.218127	-0.130827	-0.559441	-0.309091	0.137363	0.0514706
cf-mtDNA	0.202797	-0.0272727	-0.0494505	-0.161765	0.0909091	-0.42953	-0.10989	-0.177444	0.0676692	0.174825	-0.4	-0.0604396	0.218137	0.020979	-0.0154799	0.456044	-0.252632	0.345865	-0.0666671	-0.050114	0.252747	-0.248927	-0.20979	-0.151781	0.077029	-0.0406321	0.248214	0.524476	0.652975	0.543956	0.708333	0.0699301	0.22807	0.0494505	0.199323	0.309774	0.230769	0.0727273	0.467033	-0.00490196	0.167832	0.0939112	0.379121	0.258744	0.126316	0.307692	0.363636	0.401099	0.188725
CRP	0.0559441	0.335664	0.468132	0.0877193	-0.230769	-0.00309757	-0.131868	0.22406	0.0195489	-0.160839	-0.160839	-0.283516	-0.455108	-0.461538	-0.448916	-0.00549451	-0.18797	-0.193985	-0.136843	0.0595447	0.213187	-0.00206505	-0.160839	0.202375	-0.275103	0.0812641	-0.0270779	-0.202797	-0.249124	0.0461538	-0.20743	-0.13986	-0.24871	0.263736	-0.0639338	0.0631579	-0.573427	-0.328671	0.032967	0.147575	-0.048951	-0.23839	0.0494505	0.0917638	0.075188	-0.468531	-0.321678	0.103297	0.182663
IL6	-0.321678	-0.236364	0.0907841	0.00245098	-0.433566	0.229855	0.541954	0.155698	-0.240692	0.020979	0.309091	-0.148556	-0.642157	-0.405594	-0.361384	-0.437414	0.101542	-0.450545	-0.185966	-0.0820048	-0.357634	0.454936	0.111888	0.248967	0.225895	-0.170869	-0.136945	-0.104895	-0.319638	0.0165062	-0.14951	-0.321678	-0.168302	-0.0165062	0.0376223	-0.235427	-0.153846	0.0909091	-0.0632738	-0.00490196	-0.643357	-0.11461	-0.15956	0.208804	0.124107	-0.0559441	-0.00909091	-0.126548	0.384804
C-peptide	0.0545455	-0.236364	-0.013986	0.117647	0.0525395	0.262397	0.013986	0.177271	0.124616	0.190909	-0.393939	-0.153846	-0.0441176	-0.255692	-0.084667	-0.160839	0.0210619	-0.215884	-0.196349	-0.267478	-0.0699301	0.46652	0.147111	-0.239153	0.112084	0.14223	0.11233	0.1	-0.431613	-0.370629	-0.414706	-0.346761	-0.136293	-0.629371	0.169447	-0.0842475	-0.0636364	0.248485	0.118881	-0.167647	0.0945711	-0.108415	-0.34965	0.351031	0.154454	-0.227273	-0.248485	0.0769231	-0.0235294
Glucose	-0.153846	0.104895	-0.252747	-0.0546956	-0.216783	-0.0918947	0.10989	-0.305263	-0.380451	-0.216783	-0.398601	-0.156044	-0.0485036	0.167832	-0.0526316	-0.428571	-0.184962	-0.464662	0.221054	-0.371279	-0.274725	0.363449	0.0979021	-0.0640165	0.310867	-0.179835	-0.527266	-0.216783	-0.192984	0.410989	-0.110423	-0.258741	-0.213622	-0.230769	-0.0676946	-0.276692	-0.258741	-0.132867	0.142857	-0.162023	-0.51049	-0.345717	-0.126374	-0.102294	-0.473684	-0.188811	-0.405594	0.345055	0.180599
Insulin	-0.136364	-0.336364	-0.401099	-0.296569	-0.0559441	0.0258131	0.111888	-0.0508772	-0.124561	0.4	-0.581818	-0.230769	0.0122549	0.013986	0.0423117	-0.111888	-0.0245614	-0.189474	-0.118723	-0.341687	-0.010989	0.208461	0.0909091	-0.269489	0.0455342	0.167617	-0.129825	0.0454545	-0.282461	-0.307692	-0.247549	-0.426573	-0.141383	-0.454545	0.120228	-0.168421	0.154545	0.518182	0.313187	-0.264706	-0.013986	-0.0856553	-0.377622	0.354386	-0.187719	-0.00909091	0.136364	0.362637	0.115196
Creatine	-0.034965	-0.105024	-0.154058	-0.269939	-0.140105	-0.402584	-0.453921	-0.283026	0.0617238	0.20979	-0.534252	-0.145805	0.0233129	0.0805605	-0.0278926	0.324622	-0.412496	0.170117	0.256142	-0.0732267	0.423659	-0.395949	-0.483363	-0.0687339	-0.37741	-0.0730697	0.356928	0.713287	0.694954	0.453921	0.468712	-0.0840632	0.198347	0.118294	0.0621235	0.23711	0.020979	0.196349	0.18707	0.0576688	0.297724	0.338843	0.13205	0.114458	0.179902	0.300699	0.461192	0.365888	0.107976
Triglycerides	-0.405594	-0.127273	0.126548	0.0134887	-0.433566	0.289256	-0.236589	-0.0864987	0.036856	0.265734	-0.154545	-0.533701	-0.252606	0.0559441	0.0144553	-0.228336	0.176758	-0.0872509	0.284212	-0.0318907	-0.415406	-0.0257669	-0.244755	-0.0444215	0.294766	-0.24012	0.184349	0.447552	0.579915	-0.203577	-0.161864	-0.293706	-0.193082	-0.536452	0.113619	0.0511471	-0.244755	0.454545	-0.0247593	-0.344574	-0.48951	-0.330408	-0.748281	0.255831	0.0436254	-0.0559441	0.554545	-0.112792	-0.262416
TC	0.125874	0.0272727	0.0659341	0.169118	-0.034965	0.300465	0.252747	0.075188	0.0270677	-0.230769	0.454545	0.197802	-0.240196	0.048951	-0.176471	-0.406593	0.183459	-0.269173	-0.252633	-0.0728931	-0.43956	0.101778	0.013986	-0.0536913	0.112792	-0.00752446	-0.251222	-0.363636	-0.410963	-0.675824	-0.463235	-0.223776	-0.28999	0.0549451	-0.191049	-0.222556	-0.27972	-0.181818	-0.307692	-0.227941	-0.034965	-0.318885	-0.28022	-0.333208	-0.075188	-0.454545	-0.3	-0.412088	-0.355392
LDL	0.125874	-0.0363636	0.0384615	0.196078	-0.013986	0.305627	0.32967	0.0451128	0.0466165	-0.272727	0.272727	0.17033	-0.321078	0.041958	-0.178535	-0.450549	0.106767	-0.273684	-0.0771935	0.0728931	-0.357143	0.0686695	0.027972	0.0392359	0.242091	-0.0474041	-0.233923	-0.244755	-0.319638	-0.598901	-0.404412	-0.160839	-0.21775	0.0769231	-0.211358	-0.138346	-0.356643	-0.118182	-0.192308	-0.164216	-0.0629371	-0.294118	-0.252747	-0.392629	-0.0616541	-0.412587	-0.136364	-0.285714	-0.303922
HDL	0.153846	-0.0545455	0.0659341	-0.0857843	0.0909091	-0.141456	-0.104396	0.150376	-0.081203	-0.13986	0.354545	0.489011	0.308824	0.048951	0.0546956	0.401099	0.210526	-0.0210526	-0.614039	0.0455582	0.0494505	0.0171674	-0.167832	-0.32731	-0.687759	0.218962	-0.0188041	-0.601399	-0.360734	-0.417582	-0.245098	0.034965	-0.0485036	0.423077	0.0849944	-0.329323	0.251748	-0.00909091	-0.428571	0.0367647	0.671329	0.360165	0.236264	0.190297	0.0285714	-0.048951	-0.209091	-0.417582	-0.0514706
Albumin	-0.73205	0.127563	-0.324176	-0.157152	-0.423819	-0.00206718	0.10989	-0.19044	0.111404	0.119089	0.387245	-0.0274725	-0.243094	-0.0280211	0.120868	-0.203297	0.106888	-0.0986075	-0.168717	-0.230594	-0.401099	-0.291155	-0.115587	-0.0211886	-0.0495186	-0.263654	-0.123494	-0.196147	0.281465	-0.351648	-0.327809	-0.112084	-0.284091	0.247253	-0.235316	0.0790366	0.161121	0.0865606	-0.681319	-0.122775	-0.19965	0.19938	-0.126374	-0.14006	0.222808	0.157618	0.159454	-0.379121	-0.338859
Bun	-0.146853	-0.181818	0.236264	0.0955882	0.258741	0.484254	-0.148352	0.180451	0.130827	-0.167832	0.0181818	-0.357143	-0.394608	-0.230769	-0.256966	-0.263736	-0.293233	0.112782	0.691232	0.182233	0.258242	0.161864	0.34965	0.601962	0.360385	0.124906	0.561113	0.433566	0.547951	0.445055	0.151961	0.0699301	0.349845	-0.648352	-0.0240692	0.290226	-0.370629	0.345455	-0.010989	0.340686	0.118881	0.339525	-0.565934	0.15645	0.345865	0.167832	0.609091	0.192308	0.208333
Calcium	-0.255692	0.159454	-0.203297	-0.011043	-0.157618	0.242894	-0.0771353	-0.106095	0.198646	-0.290718	-0.127563	-0.197802	-0.0294479	0.346761	0.017562	0.0798901	-0.0436418	-0.106847	-0.163445	0.0593607	-0.302198	-0.243094	-0.0910684	-0.140052	-0.322759	0.0790663	-0.0346255	-0.374782	0.295195	-0.307692	-0.366871	-0.0210158	-0.11157	0.297522	0.0297328	0.0579383	-0.413311	-0.100228	-0.379121	-0.182822	0.269703	0.168389	-0.33058	-0.0873165	-0.125658	-0.31874	-0.0683373	-0.032967	-0.435583
Chloride	-0.13986	0.1	-0.0769231	-0.310239	0.119089	-0.157025	-0.291209	-0.176758	-0.092516	0.258741	0.172727	0.351648	0.278357	0.444834	0.392359	-0.043956	0.00977811	0.134637	0.666671	0.118451	0.604396	-0.187117	-0.0455342	0.26343	0.10729	0.0700038	0.0917983	0.216783	-0.018265	0.0879121	-0.160638	0.150613	0.217863	-0.373626	-0.337096	0.0255735	0.174825	0.172727	-0.021978	0.116493	0.213661	0.22509	-0.28022	-0.184349	0.0526514	0.251748	0.209091	0.010989	-0.0993256
CO2	-0.146853	0.363636	0.0604396	0.354384	0.23158	0.416538	-0.0384615	0.0285929	0.417607	0.559441	-0.136364	-0.214286	0.354384	0.515793	0.542356	-0.159341	0.324304	0.530474	-0.171931	0.050114	-0.472527	-0.0607362	0.280703	-0.145736	0.53095	-0.0466867	0.340986	0.622378	0.493156	0.17033	0.378909	0.508775	0.266529	-0.510989	0.491155	0.561324	-0.0839161	0.136364	0.21978	-0.246475	-0.315791	-0.365703	-0.269231	0.122695	-0.069225	-0.048951	0.136364	0.032967	-0.280809
Potassium	-0.0980737	0.663636	0.236915	0.470807	0.0599671	0.360767	0.21183	0.0708902	0.460032	0.707532	0.4	0.369147	0.367549	0.546758	0.497674	0.363137	0.603321	0.549022	-0.107206	0.323463	-0.228651	-0.0313654	0.275143	0.0905799	0.30854	0.0249057	0.156922	0.280211	0.0776264	-0.407715	0.0700679	0.356275	0.157269	-0.0412655	0.012071	0.481148	0.126095	-0.0909091	-0.198348	-0.0676094	-0.261033	-0.233834	0.077029	-0.298756	-0.0588238	-0.227671	-0.0181818	-0.473831	-0.357715
Sodium	-0.165204	0.410963	0.236458	0.238426	0.0952418	0.131048	-0.323209	0.0924622	0.355449	0.548338	0.424662	0.325478	0.470676	0.532649	0.570701	0.174036	0.299365	0.57372	0.153439	0.450802	0.0639828	-0.481472	-0.271615	0.0390025	-0.0663906	0.089498	0.39387	0.277684	0.472477	0.0778921	0.171716	0.472682	0.206866	-0.0220998	0.209255	0.425175	0.158174	-0.132421	-0.35886	0.119831	0.225758	0.128902	-0.099449	-0.0993205	0.0371365	0.123025	0.105024	-0.470134	-0.428673
Data adjusted for sex and age in Prism (GraphPad 8)
			CS activity									mtDNAcn									CI activity									CII activity									CIV activity									MHI
Subject id	age	sex	B cells	Neutrophils	Natural killers	Monocytes	CD8+ Naïve	CD4+ Naïve	CD8+ CM&EM	CD4+ CM&EM	PBMCs	B cells	Neutrophils	Natural killers	Monocytes	CD8+ Naïve	CD4+ Naïve	CD8+ CM&EM	CD4+ CM&EM	PBMCs	B cells	Neutrophils	Natural killers	Monocytes	CD8+ Naïve	CD4+ Naïve	CD8+ CM&EM	CD4+ CM&EM	PBMCs	B cells	Neutrophils	Natural killers	Monocytes	CD8+ Naïve	CD4+ Naïve	CD8+ CM&EM	CD4+ CM&EM	PBMCs	B cells	Neutrophils	Natural killers	Monocytes	CD8+ Naïve	CD4+ Naïve	CD8+ CM&EM	CD4+ CM&EM	PBMCs	B cells	Neutrophils
1	23	F	33.98	NA	NA	38.63	28.69	26.3	20.52	24.41	46.28	376.38	NA	NA	302.22	462.41	312.58	282.87	324.85	375.11	1.63	NA	NA	3.08	2.04	1.51	1.7	1.59	2.81	17.66	NA	NA	21.75	17.86	16.33	12.9	13.58	28.35	1.41	NA	NA	3.71	3.02	2.1	1.52	1.83	3.97	63.52	NA
2	23	F	NA	19.64	NA	34.15	24.24	21.25	23.02	25.94	48.15	NA	131.32	NA	315.48	508.54	355.94	299.66	336.06	364.35	NA	1.08	NA	2.05	1.45	1.33	1.41	1.62	2.5	NA	12.29	NA	24.58	20.25	19.19	23.59	23.16	28.07	NA	1.8	NA	4.71	3.69	3.19	3.15	3.86	4.84	NA	79.29
3	25	F	NA	20.52	16.58	29.4	NA	NA	NA	NA	NA	NA	117.49	188.71	272.31	NA	NA	NA	NA	NA	NA	0.9	1.64	2.33	NA	NA	NA	NA	NA	NA	10.17	14.12	25.63	NA	NA	NA	NA	NA	NA	8.64	3.97	5.12	NA	NA	NA	NA	NA	NA	157.71
4	27	F	NA	24.59	NA	43.81	24.11	21.55	30.21	32.65	50.65	NA	127.34	NA	248.2	303.38	242.04	207.24	256.46	332.79	NA	0.87	NA	3.3	1.63	1.51	1.95	1.64	2.36	NA	9.7	NA	24.9	16.5	14.52	22.46	19.61	33.07	NA	1.42	NA	5.54	2.88	2.57	4.32	2.53	5.29	NA	58.8
5	32	F	34.4	NA	NA	40.84	35.05	24.74	29.08	37.49	60.12	412.64	NA	NA	335.26	393.21	316.51	355.07	310.99	470.94	1.28	NA	NA	3.36	1.93	1.37	1.5	2.52	3.64	18.07	NA	NA	30.47	20.2	21.56	21.41	25.53	35.09	6.27	NA	NA	5.26	7.24	5.19	4.52	6.14	5.66	92.68	NA
6	32	F	NA	24.29	36.29	45.63	23.4	25.07	NA	37.88	47.62	NA	142.31	171.84	257.84	340.87	309.08	NA	340.69	410.15	NA	1.33	1.48	3.06	1.8	1.55	NA	1.52	3.46	NA	12.04	24.13	30.89	19.2	18.23	NA	25.07	32.07	NA	3.01	3.01	6.16	1.42	3.49	NA	5.19	5.04	NA	91.85
7	40	F	31.85	25.04	NA	38.4	NA	16.98	19.95	21.79	72.08	509.61	121.21	NA	315.79	NA	349.55	349.21	334.46	523.9	1.32	0.73	NA	2.56	NA	1.14	1.41	1.49	3.08	21.11	13.68	NA	28.04	NA	16.12	22.23	19.87	43.39	3.64	2.96	NA	3.62	NA	2.39	3.82	3.28	4.94	72.48	81.99
8	41	F	31.9	NA	21.86	NA	19.89	20.33	31.45	26.42	50.33	489.68	NA	186.25	NA	448.16	338.65	337.17	366.17	367.06	1.21	NA	1.36	NA	1.58	1.12	1.49	1.48	1.57	14.71	NA	19.14	NA	19.06	16.03	25.9	22.38	29.59	5.2	NA	2.87	NA	2.4	3.97	4.28	3.5	4.68	75.17	NA
9	43	F	NA	22.31	22.32	35.67	NA	18.9	24.49	27.82	38.79	NA	120.59	238.89	304.89	NA	348.11	270.75	306.24	362.76	NA	0.48	1.94	3.4	NA	1.41	1.33	1.71	2.32	NA	8.76	23.36	26.77	NA	16.97	20.45	21.82	25.4	NA	3.62	3.92	5.32	NA	2.96	3.69	3.19	4.12	NA	76.1
10	52	F	42.87	NA	27.95	47.87	25.62	25.04	NA	31.16	73.43	503.42	NA	246.58	312.76	531.31	359.03	NA	349.47	496.64	1.4	NA	1.65	2.81	1.55	1.42	NA	1.65	3.25	22.67	NA	22.96	33.47	21.72	22.21	NA	23.16	38.26	3.41	NA	4.29	5.47	3.25	2.46	NA	2.04	4.37	67.08	NA
11	57	F	30.84	25.53	23.77	39.1	NA	21.62	NA	32.57	47.56	415.98	136.06	198.69	303.45	NA	326.77	NA	303.6	382.85	1.52	1.39	1.58	2.48	NA	1.53	NA	1.92	2.76	12.94	11.11	20.89	23.2	NA	15.11	NA	19.2	32.84	4.62	3.28	1.79	5.82	NA	4.03	NA	2.5	4.1	78.37	93.47
12	24	M	NA	NA	20.78	35.03	27.8	18.9	26.21	22.48	44.92	NA	NA	260.93	366.66	576.21	428.51	321.99	368.83	449.48	NA	NA	1.4	2.78	1.89	1.38	2	1.33	2.37	NA	NA	25.51	33.06	29.32	21.7	23.25	22.34	33.36	NA	NA	3.46	4.65	2.77	2.88	4.78	2.87	4.09	NA	NA
13	25	M	31.25	24.63	NA	45.02	NA	25.47	29.96	33.48	56.47	525.43	144.08	NA	300.09	NA	375.6	256.38	322.5	444.01	1.45	0.73	NA	3.41	NA	1.66	1.87	2.07	2.97	21.03	11.11	NA	29.99	NA	20.35	18.87	22.19	38.15	6.31	3.82	NA	6.04	NA	3.8	3.05	3.24	4.88	93.19	87.43
14	26	M	NA	NA	22.29	39.37	22.01	16.49	22.29	26.87	49.35	NA	NA	210.17	256.16	406.08	295.34	270.43	278.32	391.56	NA	NA	1.53	2.01	1.29	0.91	1.21	1.42	3.43	NA	NA	21.39	25.78	15.03	12.81	23.18	19.1	31.02	NA	NA	2.41	5.79	3.2	4.17	4.09	2.63	5.23	NA	NA
15	29	M	NA	NA	NA	31.98	20.29	15.79	24.88	24.09	29.55	NA	NA	NA	281.48	413.24	290.5	383.61	300.69	303.36	NA	NA	NA	3.06	1.24	1.46	0.56	1.81	1.77	NA	NA	NA	27.37	14.43	16.27	24.34	21.49	19.91	NA	NA	NA	4.75	3.43	3.6	3.45	3.46	3.36	NA	NA
16	33	M	32.85	26.64	30.56	49.9	NA	29.4	NA	42.91	78.23	511.17	123.14	200.29	308.07	NA	324.26	NA	398.27	441.5	1.18	1.35	1.27	2.83	NA	1.19	NA	1.87	3.39	15.73	11.02	15.68	21.58	NA	13.32	NA	27.36	38.6	3.01	2.1	2.47	3.84	NA	1.82	NA	3.74	4.32	58.03	71.34
17	34	M	38.4	NA	28.42	45.87	29.74	28.27	NA	34.02	96.13	383.81	NA	211.95	295.71	409.12	313.03	NA	315.72	535.3	1.48	NA	2.43	3.05	2.3	1.8	NA	1.87	4.05	16.08	NA	23.98	27.11	21.93	22.88	NA	18.89	54.25	2.75	NA	3.33	6.46	4.12	4.01	NA	2.71	6.17	65.46	NA
18	40	M	37.66	NA	27.6	NA	29.45	18.74	NA	31.55	37.56	372.1	NA	140.3	NA	329.56	257.34	NA	279.44	380.65	1.32	NA	1.47	NA	1.84	1.27	NA	1.93	0.51	11.5	NA	20.23	NA	15.56	12.77	NA	19.56	14.24	5.18	NA	3.65	NA	3.54	2.43	NA	3.7	2.98	76.97	NA
19	45	M	37.1	22.26	23.93	NA	NA	24.35	25.27	29.33	58.9	516.91	93.35	182.4	NA	NA	322.04	330.98	312.08	425.37	1.52	1.14	1.83	NA	NA	1.43	2.01	1.69	3.48	23.7	11.39	21.99	NA	NA	20.93	17.67	21.98	39.08	3.98	3.86	4.86	NA	NA	3.16	3.44	4.31	5.65	75.86	108.53
20	53	M	NA	20.19	23.9	36.41	NA	NA	NA	28.44	46.22	NA	164.5	304.77	292.46	NA	NA	NA	410.36	379.71	NA	1.01	1.5	2.79	NA	NA	NA	1.5	3.02	NA	9.98	13.45	22.77	NA	NA	NA	17.94	25.75	NA	3.85	2.65	4.7	NA	NA	NA	3.1	5.99	NA	94.11
21	56	M	28.58	21.94	20.88	31.21	NA	NA	24.56	24.94	37.67	398.28	115.17	130.49	273.94	NA	NA	238.29	242.78	335.6	1.41	0.62	1.43	2.82	NA	NA	1.59	1.65	2.76	19.12	12.04	23.88	28.09	NA	NA	20.34	22.56	31.77	3.35	4.03	3.63	4.34	NA	NA	2.87	4.31	4.34	79.79	95.16
Raw data
			CS activity									mtDNAcn									CI activity									CII activity									CIV activity									MHI
subject_id	age	sex	B cells	Neutrophils	Natural killers	Monocytes	CD8+ Naïve	CD4+ Naïve	CD8+ CM&EM	CD4+ CM&EM	PBMCs	B cells	Neutrophils	Natural killers	Monocytes	CD8+ Naïve	CD4+ Naïve	CD8+ CM&EM	CD4+ CM&EM	PBMCs	B cells	Neutrophils	Natural killers	Monocytes	CD8+ Naïve	CD4+ Naïve	CD8+ CM&EM	CD4+ CM&EM	PBMCs	B cells	Neutrophils	Natural killers	Monocytes	CD8+ Naïve	CD4+ Naïve	CD8+ CM&EM	CD4+ CM&EM	PBMCs	B cells	Neutrophils	Natural killers	Monocytes	CD8+ Naïve	CD4+ Naïve	CD8+ CM&EM	CD4+ CM&EM	PBMCs	B cells	Neutrophils
1	23	F	40.2926	NA	NA	41.8749	29.141	27.0296	23.5536	27.3244	47.6253	351.432	NA	NA	274.285	444.046	274.559	273.957	311.26	367.063	1.61093	NA	NA	3.48414	2.11224	1.36532	1.63835	1.64668	3.03303	17.2831	NA	NA	22.3216	16.8484	15.7717	9.61569	11.5594	26.8376	0.174371	NA	NA	3.91391	2.8198	2.03756	1.58188	2.17304	3.81006	50.0298	NA
2	23	F	NA	23.0678	NA	37.3941	24.6856	21.9791	26.0536	28.8535	49.5	NA	116.471	NA	287.542	490.179	317.916	290.742	322.472	356.308	NA	1.01589	NA	2.45506	1.51912	1.18559	1.34992	1.6776	2.72133	NA	11.7504	NA	25.1509	19.2461	18.6351	20.2969	21.1362	26.5499	NA	2.72305	NA	4.90799	3.49499	3.13203	3.21055	4.20004	4.68321	NA	85.904
3	25	F	NA	23.5823	17.6288	32.5379	NA	NA	NA	NA	NA	NA	103.956	155.241	247.84	NA	NA	NA	NA	NA	NA	0.841711	1.55978	2.71951	NA	NA	NA	NA	NA	NA	9.79585	14.7708	26.1505	NA	NA	NA	NA	NA	NA	9.49407	4.2096	5.29523	NA	NA	NA	NA	NA	NA	164.232
4	27	F	NA	27.2894	NA	46.838	24.9918	22.3108	33.2006	35.4684	51.9901	NA	115.131	NA	227.202	292.307	215.585	209.278	249.344	327.983	NA	0.815662	NA	3.67197	1.69052	1.40236	1.96018	1.68278	2.53719	NA	9.47802	NA	25.3628	15.9858	14.2687	20.5619	18.3195	31.6807	NA	2.19556	NA	5.68464	2.74674	2.57128	4.43153	2.82041	5.12614	NA	65.2299
5	32	F	37.8307	NA	NA	43.5952	36.4775	25.538	32.0168	40.1959	61.4562	410.008	NA	NA	322.931	391.235	304.527	370.793	311.956	470.179	1.27481	NA	NA	3.68074	1.97395	1.30946	1.60449	2.54118	3.75571	18.0231	NA	NA	30.7961	20.3051	21.6869	21.2419	25.154	33.8493	5.42429	NA	NA	5.3428	7.1961	5.26343	4.68192	6.3619	5.48733	83.5048	NA
6	32	F	NA	26.091	37.4198	48.3805	24.827	25.8697	NA	40.5841	48.9559	NA	133.396	153.906	245.509	338.898	297.091	NA	341.659	409.387	NA	1.28412	1.38255	3.38236	1.83837	1.49078	NA	1.54531	3.57653	NA	12.2184	24.8977	31.2135	19.3022	18.3563	NA	24.6908	30.8319	NA	3.59952	3.29601	6.24778	1.37679	3.56454	NA	5.41232	4.8695	NA	98.0332
7	40	F	32.7214	25.3918	NA	40.7169	NA	17.8464	22.8057	24.3012	73.3951	526.811	117.565	NA	317.331	NA	360.707	386.835	348.362	529.612	1.31446	0.708782	NA	2.80059	NA	1.15728	1.6484	1.47704	3.10784	21.3554	14.4912	NA	28.1434	NA	16.86	24.8392	20.9486	42.3964	3.1408	3.25987	NA	3.60348	NA	2.58817	4.07627	3.38924	4.75324	67.1408	87.7899
8	41	F	32.4539	NA	23.091	NA	22.2936	21.2072	34.2938	28.9093	51.6483	509.369	NA	188.295	NA	462.578	352.695	377.531	381.692	373.588	1.20752	NA	1.23657	NA	1.59519	1.14137	1.75467	1.47016	1.5882	14.9915	NA	20.0467	NA	20.275	16.8485	28.8538	23.6468	28.6326	4.74015	NA	3.21519	NA	2.50465	4.18931	4.54748	3.59149	4.49693	70.3114	NA
9	43	F	NA	22.1192	23.5635	37.8181	NA	19.7899	27.3113	30.2595	40.1057	NA	118.912	245.375	311.634	NA	367.946	316.587	324.995	370.903	NA	0.457711	1.81794	3.61614	NA	1.45642	1.62391	1.69355	2.30836	NA	9.80153	24.2963	26.7947	NA	17.9396	24.105	23.4443	24.5012	NA	3.80079	4.27322	5.26556	NA	3.20728	3.97514	3.25915	3.92907	NA	81.7562
10	52	F	39.8968	NA	29.2962	49.5247	29.2217	26.0095	NA	33.3913	74.7237	550.377	NA	273.041	335.111	565.766	404.895	NA	382.783	512.07	1.4107	NA	1.50281	2.93926	1.52398	1.54834	NA	1.59205	3.14119	23.3547	NA	24.0482	33.2461	24.3008	23.8639	NA	26.4302	37.6411	3.42323	NA	4.70465	5.29583	3.54351	2.84683	NA	1.98248	4.16766	67.4947	NA
11	57	F	26.2607	22.8128	25.1724	40.4874	NA	22.6235	NA	34.6785	48.8477	475.339	143.612	236.244	334.462	NA	387.101	NA	344.997	402.335	1.53262	1.41112	1.42094	2.56198	NA	1.70269	NA	1.84144	2.59517	13.8057	13.2651	22.0504	22.8314	NA	17.1502	NA	23.3796	32.3772	4.85539	2.94798	2.23371	5.58193	NA	4.49109	NA	2.37404	3.88514	81.1894	98.4591
12	24	M	NA	NA	19.6937	32.417	24.959	17.7774	22.9006	20.1964	43.6225	NA	NA	225.265	355.627	564.76	402.277	273.53	339.559	436.076	NA	NA	1.52665	2.52376	1.8529	1.32073	1.68974	1.37133	2.45301	NA	NA	24.5834	33.0721	28.2076	20.4471	19.622	19.5224	34.0547	NA	NA	3.10598	4.73875	2.70498	2.56201	4.4655	2.89178	4.29216	NA	NA
13	25	M	35.0824	26.0819	NA	42.36	NA	24.3543	26.6385	31.172	55.1691	471.862	142.073	NA	290.791	NA	352.253	210.662	294.854	431.41	1.43758	0.735324	NA	3.14674	NA	1.61455	1.57961	2.11495	3.0405	20.2486	9.12545	NA	29.9801	NA	19.1743	15.5911	19.5561	38.872	6.17454	3.80599	NA	6.11787	NA	3.50102	2.74853	3.24907	5.07875	91.4932	79.8292
14	26	M	NA	NA	21.2218	36.6507	19.3857	15.3905	18.963	24.5321	48.0395	NA	NA	178.948	248.602	398.274	274.891	227.449	252.288	379.77	NA	NA	1.64804	1.7398	1.25304	0.872585	0.936988	1.45951	3.48923	NA	NA	20.499	25.7405	14.159	11.713	20.2532	16.647	31.7782	NA	NA	2.06268	5.84928	3.16497	3.88773	3.79131	2.61984	5.42734	NA	NA
15	29	M	NA	NA	NA	29.1004	17.9874	14.7107	21.5201	21.6879	28.2424	NA	NA	NA	279.117	410.9	278.724	348.835	279.512	293.996	NA	NA	NA	2.75556	1.19353	1.44539	0.33623	1.83724	1.79232	NA	NA	NA	27.247	13.9385	15.4013	22.4549	19.5914	20.7617	NA	NA	NA	4.77432	3.447	3.36163	3.19278	3.41408	3.54798	NA	NA
16	33	M	34.1142	26.6469	29.5726	46.7986	NA	28.3526	NA	40.4046	76.9139	477.435	126.404	184.603	312.648	NA	324.055	NA	383.56	435.376	1.17845	1.37887	1.37278	2.49309	NA	1.21426	NA	1.88584	3.36446	15.2366	9.66853	14.8983	21.3443	NA	12.76	NA	26.1868	39.5764	3.22234	1.78469	2.17446	3.8093	NA	1.64409	NA	3.6361	4.50742	60.1684	63.3519
17	34	M	39.3436	NA	27.4426	42.7172	27.9846	27.236	NA	31.4952	94.8099	352.553	NA	198.484	302.017	415.888	315.722	NA	302.624	529.991	1.47683	NA	2.53447	2.69656	2.2358	1.82919	NA	1.87494	4.01829	15.6274	NA	23.2166	26.8519	22.0578	22.4	NA	17.9006	55.2524	3.00312	NA	3.04039	6.42108	4.22071	3.85264	NA	2.59699	6.34958	68.0817	NA
18	40	M	36.6878	NA	26.6866	NA	28.343	17.7529	NA	28.8833	36.2258	355.719	NA	140.153	NA	347.256	277.385	NA	276.048	380.194	1.32179	NA	1.56212	NA	1.75325	1.35573	NA	1.91532	0.41	11.2625	NA	19.5549	NA	16.4207	12.7435	NA	19.6647	15.4287	5.69487	NA	3.3966	NA	3.74868	2.36367	NA	3.49986	3.15099	82.4665	NA
19	45	M	34.518	20.1067	23.0669	NA	NA	23.4023	21.7337	26.5424	57.5564	512.927	104.516	193.359	NA	NA	356.546	340.013	316.776	428.966	1.52313	1.20102	1.9084	NA	NA	1.56218	2.06671	1.65426	3.31923	23.6498	10.9839	21.402	NA	NA	21.2877	21.3365	23.0023	40.4208	4.71069	3.1077	4.63575	NA	NA	3.16301	3.36192	4.04662	5.82281	83.7519	99.9654
20	53	M	NA	16.5866	23.1307	32.2113	NA	NA	NA	25.4639	44.8676	NA	180.936	333.484	331.708	NA	NA	NA	427.992	389.777	NA	1.08905	1.56477	2.25951	NA	NA	NA	1.43178	2.76502	NA	10.2048	12.9876	21.9778	NA	NA	NA	20.4154	27.3409	NA	2.7998	2.47491	4.42192	NA	NA	NA	2.72272	6.14504	NA	85.1595
21	56	M	22.4725	17.7987	20.1438	26.8447	NA	NA	20.9049	21.8931	36.3053	421.577	133.589	165.858	318.391	NA	NA	277.43	265.266	348.102	1.42347	0.707149	1.48699	2.25451	NA	NA	1.83696	1.5714	2.4703	19.4788	12.504	23.4664	27.2154	NA	NA	27.8228	25.5879	33.4566	4.5588	2.87326	3.47822	4.02013	NA	NA	2.91807	3.88754	4.49618	92.9618	86.0672
[truncated: 27 more columns]

## Sheet: 9c
* Spearman's r correlations calculated in Prism (GraphPad 8)
	CS activity							mtDNAcn							CI activity							CII activity							CIV activity							MHI
	Neutrophils	Natural killers	Monocytes	CD8+ Naïve	CD4+ Naïve	CD4+ CM&EM	PBMCs	Neutrophils	Natural killers	Monocytes	CD8+ Naïve	CD4+ Naïve	CD4+ CM&EM	PBMCs	Neutrophils	Natural killers	Monocytes	CD8+ Naïve	CD4+ Naïve	CD4+ CM&EM	PBMCs	Neutrophils	Natural killers	Monocytes	CD8+ Naïve	CD4+ Naïve	CD4+ CM&EM	PBMCs	Neutrophils	Natural killers	Monocytes	CD8+ Naïve	CD4+ Naïve	CD4+ CM&EM	PBMCs	Neutrophils	Natural killers	Monocytes	CD8+ Naïve	CD4+ Naïve	CD4+ CM&EM	PBMCs
Testosterone	-0.214286	-0.0357143	0.0285714	-0.535714	0.107143	-0.6	-0.142857	-0.0900937	-0.252263	0.698253	0.5	0.846881	0.0857143	-0.522544	-0.142857	-0.321429	0.428571	0.214286	-0.357143	0.6	-0.285714	-0.642857	-0.0357143	0.0857143	0.214286	-0.25	0.0285714	-0.392857	-0.857143	-0.107143	-0.6	0.571429	0.142857	-0.257143	0.0357143	-0.428571	0.107143	0.314286	0.75	-0.178571	0.542857	-0.678571
Estradiol	-0.285714	-0.357143	-0.485714	-0.428571	0.642857	-0.828571	-0.142857	-0.378394	-0.324338	0.819689	-0.0357143	0.2883	0.485714	0.0900938	-0.642857	-0.178571	-0.485714	-0.25	-0.571429	-0.371429	-0.678571	-0.0357143	0.285714	0.0285714	0.0357143	-0.357143	-0.771429	0.214286	-0.392857	-0.642857	-0.714286	0.571429	0.214286	-0.657143	0.642857	-0.428571	-0.321429	-0.0857143	0.75	-0.5	0.0857143	-0.75
cf-mtDNA	-0.428571	-0.142857	-0.0857143	-0.257143	-0.542857	0.2	-0.0857143	-0.231908	-0.0289886	-0.394665	-0.0857143	0	-0.142857	-0.579771	0.257143	-0.142857	0.657143	0.0285714	0.6	0.371429	0.142857	-0.371429	-0.485714	-0.371429	-0.142857	-0.314286	0.371429	-0.257143	-0.542857	0.257143	0.542857	-0.257143	-0.314286	0.428571	-0.428571	0.371429	0.142857	0.2	-0.371429	0.0857143	0.2	0.0857143
CRP	-0.383333	-0.516667	-0.428571	-0.0666667	-0.5	-0.321429	-0.35	-0.343099	-0.29289	-0.630062	-0.85	-0.803354	-0.75	-0.25211	0.0166667	0.383333	-0.0357143	0.35	-0.283333	0	-0.0666667	0.6	-0.133333	-0.357143	0.416667	-0.45	-0.428571	0.133333	-0.266667	0.216667	-0.571429	-0.3	-0.0666667	-0.5	-0.616667	0.1	0.65	-0.5	0.2	0.0166667	0.178571	0.166667
IL6	0.2	0.2	-0.1	-0.7	0.5	-0.8	0.1	0.359092	0.205196	0.872082	0.7	0.7	0.3	0.0512989	0.1	0.3	0	0.3	-0.5	0.3	-0.1	-0.3	1	0.7	0.3	0.4	-0.5	-0.1	-0.1	-0.6	-0.6	0.3	0.6	-0.8	0.3	-0.1	-0.3	0.8	0.6	0.2	0	-0.2
C-peptide	0.179644	0.0718576	0.142857	0.646718	0.359288	0.392857	0.0718576	-0.0903614	0.120482	-0.0370625	-0.275454	-0.277108	0.321429	0.536145	-0.215573	-0.0718576	-0.678571	-0.263478	0.107786	-0.928571	-0.179644	0.610789	-0.119763	-0.285714	-0.323359	-0.0479051	0	0.610789	0.514979	0.0239525	0.214286	-0.239525	-0.179644	0.357143	0.419169	-0.0479051	-0.311383	-0.357143	-0.359288	-0.371264	-0.0357143	-0.179644
Glucose	0	0.0669462	0.630656	0.359836	-0.627621	0.846881	-0.158997	-0.0084034	-0.0462185	-0.560968	-0.108788	-0.155462	-0.414431	-0.265825	0.43515	0.175734	0.198206	0.43515	0.0753145	-0.0360375	0.209207	0.200839	-0.585779	-0.0360375	-0.0167365	-0.0502096	0.72075	-0.276153	-0.0167365	0.702935	0.504525	-0.552306	-0.368204	0.666694	-0.610884	0.225943	0.443519	0.0180188	-0.518833	0.0753145	0.270281	0.309626
Insulin	0.134459	0.134459	-0.0357143	0.6891	0.243706	0.285714	0.109248	-0.0084389	-0.0421945	-0.407687	0	0.122364	0.0357143	0.20339	-0.243706	-0.134459	-0.428571	-0.25211	0.0336146	-0.714286	-0.193284	0.369761	-0.394972	-0.678571	0.0840366	-0.0168073	-0.0357143	0.386568	0.268917	0.218495	0.0714286	-0.0336146	-0.369761	0.321429	0.420183	0.0420183	-0.0672293	-0.571429	-0.260513	-0.546238	0.107143	-0.512623
Creatine	0.414758	0.439155	0.370625	-0.121987	0.170783	0.518875	0.658733	0.220896	0.736321	0	-0.0243975	-0.355888	0.667124	0.613601	-0.146385	-0.439155	-0.370625	-0.19518	0.78072	-0.111187	0.561143	-0.121987	0.19518	0.0370625	-0.756323	0.0243975	0.370625	0.48795	0.365963	0.243975	0.555937	0.146385	0.365963	0.630062	-0.048795	-0.29277	-0.609938	-0.14825	-0.243975	0.658733	-0.667124	0.805118
Triglycerides	0.431145	0.395217	0.2883	-0.155691	0.203596	0.43245	0.47905	0.385542	0.698795	0.336581	0.203596	-0.162651	0.630656	0.662651	0.215573	0.0239525	-0.14415	-0.143715	0.730552	-0.126131	0.491027	-0.0479051	0.538932	0.504525	-0.622766	0.419169	0.306319	0.323359	0.610789	-0.167668	0.774806	-0.215573	0.323359	0.414431	0.0838338	0.0958101	-0.610789	0.486506	-0.47905	0.562884	-0.414431	0.742528
TC	0.904762	0.904762	0.892857	0.238095	0.357143	0.678571	0.952381	0.790433	0.99403	0.44475	0.333333	0.143715	0.464286	0.730552	0.238095	-0.333333	0.0714286	0.47619	0.904762	-0.0357143	0.880952	-0.119048	0.47619	0.214286	-0.571429	0.357143	0.821429	0.428571	0.5	0.285714	0.464286	0.0238095	0.738095	0.821429	-0.333333	-0.309524	-0.452381	0.285714	-0.190476	0.785714	0.107143	0.52381
LDL	0.904762	0.97619	0.892857	0.285714	0.357143	0.678571	0.880952	0.790433	0.910196	0.44475	0.571429	0.455098	0.464286	0.574861	0.285714	-0.404762	0.0714286	0.547619	0.809524	-0.0357143	0.809524	-0.309524	0.309524	0.214286	-0.571429	0.380952	0.821429	0.238095	0.380952	0.333333	0.464286	0.0476191	0.642857	0.821429	-0.285714	-0.380952	-0.428571	0.285714	-0.166667	0.666667	0.107143	0.309524
HDL	0.619048	0.619048	0.357143	-0.238095	0.452381	-0.178571	0.785714	0.634742	0.646718	0.778312	0.285714	0.323359	0.321429	0.347312	0.0238095	-0.380952	0.285714	0.619048	0.452381	0.321429	0.619048	-0.380952	0.619048	0.214286	-0.190476	0.0952381	0.25	0.214286	-0.0714286	-0.0238095	-0.25	0.452381	0.952381	0.0714286	-0.357143	-0.5	-0.238095	0.321429	0.47619	0.666667	0.25	0.119048
Albumin	0.254588	0.448559	0.458889	-0.0727393	0.0969857	0.642445	0.290957	0.0731762	0.439057	0.114291	0.545545	0.310999	0.697512	0.243921	0.0121232	-0.448559	-0.201911	-0.278834	0.533422	-0.201911	0.230341	-0.533421	-0.230341	0.0550667	-0.836502	0.145479	0.513956	0	0.193971	0.206095	0.770934	0.0121232	-0.0969857	0.770934	0.266711	-0.254588	-0.654654	0.110133	-0.424313	0.230341	-0.403823	0.351573
Bun	-0.650613	-0.638337	-0.518875	-0.0368271	-0.282342	-0.555937	-0.638337	-0.617472	-0.839762	-0.5	-0.392823	-0.111145	-0.630062	-0.728617	-0.380547	-0.0122757	-0.0741249	-0.159584	-0.871576	0.14825	-0.613786	0.0982057	-0.589234	-0.407687	0.650613	-0.503304	-0.555937	-0.355996	-0.650613	0.110481	-0.815374	0.306893	-0.454201	-0.630062	0.0122757	-0.08593	0.626061	-0.630062	0.527856	-0.540131	0.0370625	-0.527856
Calcium	-0.0727393	-0.0606161	0.0545545	0.0484929	-0.242464	0.509175	-0.109109	-0.170744	0.140254	-0.358554	-0.0484929	-0.414665	0.236403	0.225627	0.0727393	0.109109	-0.381881	-0.594038	0.290957	-0.272772	0.0606161	0.145479	-0.181848	0.236403	-0.412189	0.206095	0.109109	0.0484929	0.472805	0.121232	0.709208	-0.351573	-0.436436	0.309142	0.218218	0.278834	-0.278834	0.0181848	-0.666777	0.133355	-0.600099	0.691023
Chloride	0.196411	0.233239	-0.111187	-0.589234	0.380547	-0.518875	0.60151	0.129669	0.364309	0.423077	-0.0613786	-0.0123494	0.370625	0.135844	-0.466477	-0.662889	0	0.196411	0.220963	0.370625	0.319169	-0.478753	0.331444	-0.185312	-0.245514	-0.380547	-0.185312	0.270066	-0.441926	0	-0.555937	0.822473	0.785646	-0.185312	-0.196411	-0.724267	-0.282342	-0.259437	0.761094	0.540131	-0.222375	0.147309
CO2	0.0761019	-0.0126837	-0.433461	-0.621499	0.481979	-0.669894	0.469295	0	0.350895	0.53161	-0.329775	-0.395555	0.610786	0.427455	-0.494663	-0.367826	-0.295541	-0.13952	0.253673	0.0591083	0.13952	-0.101469	0.596132	-0.078811	-0.329775	-0.304408	-0.531975	0.558081	-0.101469	-0.367826	-0.433461	0.558081	0.684917	-0.394055	0.101469	-0.431244	-0.481979	-0.197028	0.494663	0.393193	-0.453163	0.27904
Potassium	-0.181848	-0.266711	-0.127294	0.521298	-0.33945	0.0727393	-0.509175	0.018294	-0.390273	-0.132099	-0.0606161	0.0853722	-0.472805	-0.189038	0.545545	0.800132	0.418251	0.218218	-0.230341	-0.218218	-0.30308	0.521298	-0.0484929	-0.0545545	0.521298	0.254588	0.0181848	-0.157602	0.242464	-0.157602	0.218218	-0.812256	-0.472805	-0.0727393	-0.0363696	0.812255	0.448559	0.436436	-0.509175	-0.618284	0.763763	-0.509175
Sodium	-0.408648	-0.255405	-0.394055	-0.906687	0.0893917	-0.57138	0.0255405	-0.404678	-0.154163	0.265805	-0.0127702	0.0899285	0.394055	-0.31475	-0.52358	-0.52358	0.157622	-0.217094	-0.0766214	0.394055	-0.242635	-0.727904	-0.0510809	-0.295541	-0.255405	-0.600201	-0.295541	-0.0255405	-0.766214	-0.217094	-0.295541	0.676823	0.204324	-0.21673	0.153243	-0.446958	-0.319256	-0.118217	0.600201	-0.0127702	-0.236433	-0.178783
Fibrinogen	-0.464286	-0.535714	-0.5	0.142857	-0.142857	-0.392857	-0.392857	-0.306319	-0.504525	-0.0370625	-0.464286	-0.180188	-0.25	-0.198206	-0.0357143	0.428571	0.285714	0.214286	-0.285714	-0.25	-0.535714	0.428571	0.0357143	-0.535714	0.428571	-0.25	-0.357143	0.285714	-0.25	-0.214286	-0.214286	-0.321429	-0.178571	-0.285714	-0.0357143	0.464286	0.25	0.0357143	-0.0357143	-0.821429	0.678571	-0.892857
Raw data
	CS activity							mtDNAcn							CI activity							CII activity							CIV activity							MHI							Biomarkers
Week	Neutrophils	Natural killers	Monocytes	CD8+ Naïve	CD4+ Naïve	CD4+ CM&EM	PBMCs	Neutrophils	Natural killers	Monocytes	CD8+ Naïve	CD4+ Naïve	CD4+ CM&EM	PBMCs	Neutrophils	Natural killers	Monocytes	CD8+ Naïve	CD4+ Naïve	CD4+ CM&EM	PBMCs	Neutrophils	Natural killers	Monocytes	CD8+ Naïve	CD4+ Naïve	CD4+ CM&EM	PBMCs	Neutrophils	Natural killers	Monocytes	CD8+ Naïve	CD4+ Naïve	CD4+ CM&EM	PBMCs	Neutrophils	Natural killers	Monocytes	CD8+ Naïve	CD4+ Naïve	CD4+ CM&EM	PBMCs	Testosterone	Estradiol	cf-mtDNA	CRP	IL6	C-peptide	Glucose
1	19.7416	18.2251	NA	18.6582	15.4037	NA	138.3	94.1859	155.991	NA	358.63	255.174	NA	262	1.01437	1.43546	NA	1.78385	1.2692	NA	3.5	11.6519	18.0547	NA	18.2447	15.9554	NA	85.19	2.40691	3.13023	NA	2.43269	2.65198	NA	13.52	89.2969	116.909	NA	88.6199	91.49	NA	161.29	NA	NA	NA	0.67	NA	NA	96
2	22.1369	20.7561	NA	19.4746	18.4185	NA	155.41	103.664	135.576	NA	420.863	350.506	NA	262	0.949188	1.40517	NA	1.46507	0.983278	NA	2.25	11.2027	17.011	NA	19.1364	17.7904	NA	70.39	3.01644	3.11392	NA	3.32475	0	NA	17.91	89.7853	112.908	NA	85.2929	49.4791	NA	132.85	708	24.9	NA	0.19	NA	1.8	84
3	20.5391	18.7974	36.0467	19.2281	18.2911	26.1098	176.29	96.7877	162.804	291.415	375.076	284.845	311.295	312	0.64173	1.27872	2.90338	1.32283	1.33959	2.01244	4.32	11.6204	18.8741	27.2286	19.2436	17.0187	22.459	87.4	2.97364	3.22795	1.87425	5.18872	3.0452	1.27272	15.91	85.0679	113.675	107.363	104.915	92.2206	86.4862	148.14	NA	NA	NA	0.46	NA	1.4	73
4	25.3075	19.2579	37.5319	20.0724	20.9385	30.5412	155.77	116.163	173.964	307.281	400.416	296.481	328.648	364	1.19005	1.92018	2.72873	1.11687	1.44101	1.60776	3.17	15.4381	20.9988	29.0972	18.9884	18.8409	22.4674	91.81	4.17537	1.22406	5.99624	1.31385	0.400554	3.82471	18.73	113.31	107.075	137.966	61.9812	66.6055	96.128	145.54	557.3	19.2	110.068	0.36	1.3559	2.3	82
5	26.4338	21.5715	40.9798	22.8041	16.8725	32.1962	191.9	128.003	173.645	285.22	397.793	307.58	299.225	344	1.48671	1.82448	3.61988	1.89114	1.50437	1.87655	4.47	14.0279	17.0698	25.3117	19.2964	17.6213	24.0019	88.88	3.28963	4.79139	5.54413	2.17426	1.32112	4.42702	14.84	103.075	135.312	119.639	82.2607	77.7658	109.855	134	612.7	17.7	137.881	0.47	1.04396	2.2	98
6	26.9463	24.0141	37.8454	19.3168	24.1385	27.0655	222	127.53	184.675	321.306	401.218	335.215	343.741	364	0.87601	1.25562	3.09073	1.52272	1.55762	1.83903	4.38	11.4319	21.4795	25.4474	17.7342	17.5627	22.9878	105.65	3.25788	2.53579	5.28684	4.30477	4.9374	4.11415	17.05	82.4587	99.0465	130.663	95.0947	88.511	105.455	133.92	695.9	28.5	112.194	0.28	1.44173	1.8	69
7	33.0746	24.4043	41.647	21.8247	21.2418	29.8469	191.96	159.458	179.757	313.434	410.703	335.655	309.902	353	1.50945	1.86304	3.41747	1.99815	1.35962	1.98546	4.54	13.8967	21.6084	31.6178	19.5798	19.8621	23.0493	86.64	3.53475	2.88965	5.02795	3.11626	3.74147	3.78457	15.7	93.2625	117.231	138.786	92.7543	95.3195	106.087	134.17	682.5	21.8	84.4389	0.38	2.96654	1.5	82
8	29.5703	24.656	42.3389	19.4319	16.8907	38.4235	211.44	147.647	203.968	306.656	429.912	336.164	324.239	346	2.09077	1.41666	4.04556	1.73218	1.74667	2.09838	11.41	9.12858	20.8167	29.4295	18.0583	19.5708	24.8325	71.24	3.4713	3.80112	6.38784	2.70854	3.41413	4.47397	15.49	102.308	111.683	156.346	82.2189	104.48	104.958	176.78	632.1	14.1	164.33	0.27	NA	1.1	85
9	37.532	26.6593	61.2208	21.9997	23.6891	45.349	258.75	135.82	209.965	306.597	405.391	316.974	337.958	380	0.89127	1.21326	2.69121	1.50714	1.7065	1.83224	11.16	13.1799	20.1081	28.9949	15.3762	18.7797	24.4493	101.13	3.74675	3.84581	5.92651	3.78724	3.71799	4.61122	16.26	79.5097	102.834	110.129	83.5599	99.5059	94.3311	165.17	595.7	17.8	105.828	0.35	1.16519	2.7	90
[truncated: 14 more columns]

## Sheet: 9d
*For cohort raw values, see source data for Figure 9b
*For repeat participant raw values, see source data for Figure 9c

## Sheet: 9e
*For cohort raw values, see source data for Figure 9b
*For repeat participant raw values, see source data for Figure 9c
