# Supplementary material for: Mitochondrial phenotypes in purified human immune cell subtypes and cell mixtures
Source: eLife. 2021 Oct 26;10:e70899. doi: 10.7554/eLife.70899 (PMC8612706; doi:10.7554/eLife.70899)
Supplement: Source data 1. [file elife-70899-supp5.xlsx]

## Sheet: CV Technical replicate Chart
Technical variation
	Neutrophils	Natural killers	Monocytes	CD8+ Naïve	CD4+ Naïve	CD8+ CMEM	CD4+ CMEM	PBMCs	Average
C.S	0.0912356	0.0549487	0.0411133	0.0457334	0.0674654	0.0657526	0.0688215	0.0706771	0.0621529
mtDNAcn	0.0658967	0.0463467	0.0421732	0.053697	0.0491798	0.0599424	0.039869	0.048403	0.051015
C.I	0.273435	0.153841	0.120504	0.168651	0.141901	0.129419	0.171764	0.165572	0.165645
C.II	0.0756742	0.089335	0.0917532	0.0885223	0.0872197	0.142235	0.109955	0.059668	0.0978135
C.IV	0.145324	0.33609	0.193834	0.180863	0.403259	0.240838	0.236409	0.137913	0.248088
MHI	0.090178	0.10647	0.0774396	0.127233	0.104459	0.10814	0.114083	0.06142	0.104

## Sheet: Raw Data
Technical variation	CD4+ CM & EM																											CD4+ CM & EM C.V	CD4+ Naïve
Subject ID	14	15	18	5	4	6	17	13	1	16	10	9	8	21	20	12	2	11	7	19	Repeat-03	Repeat-04	Repeat-05	Repeat-06	Repeat-07	Repeat-08	Repeat-09		14	15	18	5	4	6	17	13	1	16	10	9	8	12	2	11	7	19	Repeat-01	Repeat-02	Repeat-03
CS	24.8069	22.6037		40.1959	37.2445	39.568	31.5298	29.8032	28.0948	37.6303	36.6206	33.0348	30.9591	22.9847	25.4639	19.572	26.4936	34.0707	24.3797	26.9939	26.1098	29.747	32.5149	26.9278	32.2485	33.9605	39.5724		15.3905	14.7107	17.7529	25.538	23.1225	25.2997	26.5038	24.3543	27.0296	28.3526	26.0707	19.7899	21.3034	16.5681	24.5349	20.9747	17.3135	23.4023	15.4037	18.4185	18.2911
CS averages	24.5321	21.6879	28.8833	40.1959	35.4684	40.5841	31.4952	31.172	27.3244	40.4046	33.3913	30.2595	28.9093	21.8931	25.4639	20.1964	28.8535	34.6785	24.3012	26.5424	26.1098	30.5412	32.1962	27.0655	29.8469	38.4235	45.349	0.208196	15.3905	14.7107	17.7529	25.538	22.3108	25.8697	27.236	24.3543	27.0296	28.3526	26.0095	19.7899	21.2072	17.7774	21.9791	22.6235	17.8464	23.4023	15.4037	18.4185	18.2911
CS C.V.	0.0158412	0.067178	0.0471908		0.0434184	0.0530065	0.0015555	0.0620984	0.0398767	0.0971048	0.136766	0.11539	0.193561	0.0987561		0.0437256	0.11567	0.0247862	0.0045703	0.024057		0.0367731	0.0139987	0.00719663	0.113795	0.115257	0.180142	0.0688215					0.061872	0.113013	0.0380222				0.00741382		0.00641377	0.096202	0.16445	0.103069	0.0422281
COX	2.11932	3.41907	2.28374	6.3619	3.56114	7.19865	2.84077	3.65399	2.73983	3.14353	2.9819	2.3228	3.37784	3.37831	2.72272	2.86566	4.21237	2.37404	3.49705	3.19494	1.27272	5.34453	3.91561	3.91181	3.91887	2.69631	3.59257		3.88773	3.36163	2.36367	5.26343	2.43361	3.38401	3.50927	3.50102	2.03756	1.64409	2.13614	3.20728	3.24491	1.72575	3.75151	3.11123	3.15394	3.16301	2.65198	0	3.0452
COX averages	2.61984	3.41408	3.49986	6.3619	2.82041	5.41232	2.59699	3.24907	2.17304	3.6361	1.98248	3.25915	3.59149	3.88754	2.72272	2.89178	4.20004	2.37404	3.38924	4.04662	1.27272	3.82471	4.42702	4.11415	3.78457	4.47397	4.61122	0.305838	3.88773	3.36163	2.36367	5.26343	2.57128	3.56454	3.85264	3.50102	2.03756	1.64409	2.84683	3.20728	4.18931	2.56201	3.13203	4.49109	2.58817	3.16301	2.65198	0	3.0452
COX C.V.	0.270183	0.0872528	0.328739		0.247801	0.307647	0.132752	0.176248	0.368866	0.191578	0.712944	0.429207	0.22673	0.129294		0.0127746	0.00415194		0.0449844	0.297645		0.561965	0.163369	0.0695548	0.0501819	0.311117	0.31241	0.236409					0.243656	0.34828	0.126044				0.217231		0.318805	0.461611	0.279716	0.434508	0.309143
SDH	13.7891	20.1793	17.455	25.154	20.7271	27.5917	20.1042	20.0382	11.374	20.6728	29.8237	27.8496	25.6958	26.5866	20.4154	20.4515	19.6234	25.1087	20.4698	22.9432	22.459	22.4595	22.1011	24.2467	22.4046	24.3359	23.5928		11.713	15.4013	12.7435	21.6869	14.3409	18.5741	24.029	19.1743	15.7717	12.76	23.2444	17.9396	17.6034	19.9216	20.1756	16.9916	16.1655	21.2877	15.9554	17.7904	17.0187
SDH averages	16.647	19.5914	19.6647	25.154	18.3195	24.6908	17.9006	19.5561	11.5594	26.1868	26.4302	23.4443	23.6468	25.5879	20.4154	19.5224	21.1362	23.3796	20.9486	23.0023	22.459	22.4674	24.0019	22.9878	23.0493	24.8325	24.4493	0.152799	11.713	15.4013	12.7435	21.6869	14.2687	18.3563	22.4	19.1743	15.7717	12.76	23.8639	17.9396	16.8485	20.4471	18.6351	17.1502	16.86	21.2877	15.9554	17.7904	17.0187
SDH C.V.	0.242787	0.116397	0.102868		0.113853	0.101834	0.17409	0.0348648	0.0226736	0.29778	0.181579	0.184774	0.253702	0.0586224		0.0673033	0.101223	0.104591	0.0323169	0.00363476		0.000495423	0.112	0.0774469	0.0395569	0.164988	0.0495428	0.109955					0.0191021	0.0798989	0.102843				0.0247898		0.0633683	0.036347	0.116909	0.013077	0.0582535
C.I	1.50365	2.23455	1.58717	2.54118	1.74325	1.73429	1.61757	1.75907	1.44618	1.7235	1.71372	2.00203	1.68493	1.83132	1.43178	1.58629	1.46605	1.54906	1.35535	1.70462	2.01244	1.54109	2.31735	2.10023	2.05561	1.541	2.30052		0.872585	1.44539	1.35573	1.30946	1.55994	1.43397	1.57373	1.61455	1.36532	1.21426	1.77557	1.45642	1.2119	1.35124	1.32899	1.31986	1.07444	1.56218	1.2692	0.983278	1.33959
C.I averages	1.45951	1.83724	1.91532	2.54118	1.68278	1.54531	1.87494	2.11495	1.64668	1.88584	1.59205	1.69355	1.47016	1.5714	1.43178	1.37133	1.6776	1.84144	1.47704	1.65426	2.01244	1.60776	1.87655	1.83903	1.98546	2.09838	1.83224	0.147083	0.872585	1.44539	1.35573	1.30946	1.40236	1.49078	1.82919	1.61455	1.36532	1.21426	1.54834	1.45642	1.14137	1.32073	1.18559	1.70269	1.15728	1.56218	1.2692	0.983278	1.33959
C.I C.V.	0.0427687	0.305825	0.177954		0.0742175	0.141586	0.194125	0.23797	0.172193	0.121736	0.108077	0.182469	0.144581	0.161399		0.221682	0.178334	0.224542	0.116512	0.043054		0.0586512	0.332196	0.20086	0.0499685	0.270178	0.361445	0.171764					0.109137	0.125721	0.197505				0.136266		0.0873828	0.0326707	0.171058	0.317966	0.101232
mtDNAcn Average/visit	252.251	278.435	259.026	311.956	257.765	345.527	296.269	314.896	303.933	366.337	389.614	347.746	390.024	257.834	427.992	337.248	319.661	332.269	364.233	316.595	311.295	320.903	294.93	339.459	304.861	317.22	355.938		274.891	278.724	277.385	304.527	211.635	296.941	302.741	352.253	274.559	324.055	390.697	367.946	343.423	396.507	322.742	356.507	339.166	356.546	255.174	350.506	284.845
mtDNAcn Average/visit	252.288	279.512	276.048	311.956	249.344	341.659	302.624	294.854	311.26	383.56	382.783	324.995	381.692	265.266	427.992	339.559	322.472	344.997	348.362	316.776	311.295	328.648	299.225	343.741	309.902	324.239	337.958	0.128031	274.891	278.724	277.385	304.527	215.585	297.091	315.722	352.253	274.559	324.055	404.895	367.946	352.695	402.277	317.916	387.101	360.707	356.546	255.174	350.506	284.845
mtDNAcn Average/visit C.V.	0.000207107	0.00351004	0.0872072		0.0535762	0.00981361	0.0296997	0.0961312	0.0332905	0.0635012	0.0252402	0.105297	0.0764546	0.0248272		0.00962504	0.012325	0.0521748	0.0644319	0.000805268		0.033325	0.020301	0.0176153	0.023004	0.0392581	0.0752364	0.039869					0.0189893	0.00402053	0.0581459				0.0373701		0.0371778	0.0202852	0.0214691	0.111771	0.0844547
MHI averages	77.0356	115.941	74.2579	128.12	94.0331	121.635	86.0625	95.5923	70.4845	80.1435	89.9542	93.6218	91.7787	120.995	75.9298	93.9731	97.5067	82.8508	87.785	97.7431	86.4862	109.76	110.536	110.997	105.44	85.7208	96.061		85.5552	100.207	78.8519	110.573	88.7193	91.1801	102.053	91.7933	72.8174	56.8072	83.6448	87.0246	83.1108	74.5827	93.2574	81.9754	81.3007	91.5866	91.49	49.4791	92.2206
MHI averages	86.5518	94.6395	102.67	128.12	84.9963	100.214	84.6161	98.4943	69.3483	89.826	78.1965	94.024	91.7188	119.459	75.9298	87.5656	100.753	74.149	91.5465	105.232	86.4862	96.128	109.855	105.455	106.087	104.958	94.3311	0.14144	85.5552	100.207	78.8519	110.573	86.9497	92.7219	105	91.7933	72.8174	56.8072	85.439	87.0246	88.5227	80.9299	84.8304	96.4819	76.2071	91.5866	91.49	49.4791	92.2206
MHI C.V.	0.15549	0.294183	0.277242		0.102288	0.189268	0.0241747	0.041667	0.0231699	0.15244	0.212642	0.148469	0.134888	0.0133902		0.103484	0.045566	0.165966	0.058107	0.100649		0.200553	0.00876307	0.0743304	0.00862008	0.176702	0.0259336	0.114083					0.0910346	0.158384	0.0396925				0.04073		0.0864595	0.110914	0.140486	0.212634	0.0945229
[truncated: 149 more columns]
