# Supplementary material for: Mitochondrial phenotypes in purified human immune cell subtypes and cell mixtures
Source: eLife. 2021 Oct 26;10:e70899. doi: 10.7554/eLife.70899 (PMC8612706; doi:10.7554/eLife.70899)
Supplement: Supplementary file 1. — Immune cell subtypes included in this study, including a brief summary of their functions and cell surface markers used for immunolabeling and FACS. FACS, fluorescence-activated cell sorting. [file elife-70899-supp1.xlsx]

## Sheet: Sheet1
Supplementary file 1
Cell Type	Biological function	Markers
B cells	Present antigens as well as provide co-stimulation and cytokines to T cells, in turn producing antigen specific antibodies (Hoffman, Lakkis et al. 2016).	CD45+, CD20+
Neutrophils	Recruited to sites of infection, having the ability to recognize and phagocytose microbes, and then kill pathogens through a combination of cytotoxic mechanisms (Mayadas, Cullere et al. 2014).	CD45+, CD15+
NK cells Natural killer cells	Effector lymphocytes in the innate immune response with cytotoxicity an cytokine producing functions (Vivier, Tomasello et al. 2008).	CD45+, CD56+, CD3-, CD20-
Monocytes	In response to infection or injury, monocytes can phagocytose and present antigens, secrete chemokine and proliferate. Once monocytes are recruited to tissues they are capable of differentiating into macrophages and dendritic cells (Chiu and Bharat 2016).	CD45+, CD3-, CD20-, HLA-DR+, CD14+, CD16+, CD56-
CD4+ naïve T cells	Mature naïve CD4+ T cells are deployed to secondary lymphoid organs where they continuously survey for pMHC II molecules, for antigen recognition (Luckheeram, Zhou et al. 2012)	CD45+, CD3+, CD20-, CD4+, CD45RA+, CCR7+,
CD4+ activated T cells	Mediate immune response through secretion of specific cytokines, activate other immune cells, and play a critical role in the suppression of immune reaction. Often referred to as helper T cells (Luckheeram, Zhou et al. 2012).	CD45+, CD3+, CD20-, CD4+, CD69+, CD25+
CD4+ CM CD4+ central memory T cells	Express the chemokine receptor CCR7, allowing them to circulate lymphoid organs and have a strong proliferative capacity but little effector functions (Stubbe, Vanderheyde et al. 2006, Gasper, Tejera et al. 2014).	CD45+, CD3+, CD20-, CD4+, CCR7+, CD45RA-
CD4+ EM CD4+ effector memory T cells	Do not express CCR7 and thus reside in the peripheral tissues. CD4 EM cells produce effector cytokines and have limited proliferative capacity (Stubbe, Vanderheyde et al. 2006, Gasper, Tejera et al. 2014).	CD45+, CD3+, CD20-, CD4+, CCR7-, CD45RA-
CD4+ TEMRA CD4+ terminally differentiated effector memory cells re-expressing CD45RA	Exhibit enhanced expression of effector molecules, providing protective immunity against reoccurring infections (Tian, Babor et al. 2017).	CD45+, CD3+, CD20-, CD4+, CCR7-, CD45RA+
CD8+ naïve T cells	Mature naïve CD8+ T cells are deployed to secondary lymphoid organs where they continuously survey for pMHC I molecules (found on all nucleated cells) for antigen recognition (Zhang and Bevan 2011).	CD45+, CD3+, CD20-, CD8+, CD69-, CD25-
CD8+ activated T cells	Recognize antigens and kill infected or malignant cells by secreting cytokines and cytotoxic granules. Often referred to as cytotoxic T cells (Mahnke, Brodie et al. 2013).	CD45+, CD3+, CD20-, CD8+, CD69+, CD25+
CD8+ CM CD8+ central memory T cells	Specialized response to systematic infections due to their centralized location in secondary lymphoid organs and superior proliferative abilities (Martin and Badovinac 2018).	CD45+, CD3+, CD20-, CD8+, CCR7+, CD45RA-
CD8+ EM CD8+ effector memory T cells	Specialized response to infections in peripheral tissues due to their cytotoxicity and ability to localize to tissues (Martin and Badovinac 2018).	CD45+, CD3+, CD20-, CD8+, CCR7-, CD45RA-
CD8+ TEMRA CD8+ terminally differentiated effector memory cells re-expressing CD45RA	Exhibit enhanced expression of effector molecules, providing protective immunity against reoccurring infections (Tian, Babor et al. 2017).	CD45+, CD3+, CD20-, CD8+, CCR7-, CD45RA+
