# Supplementary material for: Mitochondrial phenotypes in purified human immune cell subtypes and cell mixtures
Source: eLife. 2021 Oct 26;10:e70899. doi: 10.7554/eLife.70899 (PMC8612706; doi:10.7554/eLife.70899)
Supplement: Supplementary file 2. — Participants are ordered by age. CBC measurements were performed using a Sysmex XN-9000 instrument, and FACS-based cell proportions were determined using a BD Influx cell sorter (see Appendix 1 for details). CBC, complete blood count; FACS, fluorescence-activated cell sorting. [file elife-70899-supp2.xlsx]

## Sheet: Sheet1
Supplementary file 2
				CBC-based cell proportions						FACS-based cell proportions
Subject ID	Age	Sex	Ethnicity	Basophils (%)	Eosinophils (%)	Lymphocytes (%)	Monocytes (%)	Neutrophils (%)	Platelets (10^9/ L)	B cells (%)	Neutrophils (%)	NK cells (%)	Monocytes (%)	CD8+ naïve cells (%)	CD4+ naïve cells (%)	CD8+ CM cells (%)	CD8+ EM cells (%)	CD8+ TEMRA cells (%)	CD4+ CM cells (%)	CD4+ EM cells (%)	CD4+ TEMRA cells (%)
Females
1	23	F	Asian	0.3	0.5	34	8.3	56.6	278	7.52	6.5	2.79	7.59	7.05	9	0.91	8.09	6.4	12.19	3.25	0.01
2	23	F	Asian	1.2	1.3	42.4	7.8	47.1	260	7.45	21.24	7.45	10.54	7.38	12.57	1.08	6.04	0.6	5.65	3.63	0.14
3	25	F	Asian	0.6	1.9	53.4	9.9	34	355	15.33	1.38	2.73	2.21	10.81	12.24	0.94	9.44	1.76	7.13	5.32	0.11
4	27	F	White	0.5	1.4	38.6	9.1	50.2	322	6.93	7.31	3.98	10.27	9.34	19.66	1.88	4.86	0.75	15.34	2.37	0.04
5	32	F	White	1.1	3.1	28.7	8	58.8	272	11.74	0.93	5.84	14.88	5.44	17.06	1.8	4.77	3.25	10.5	3.73	0.15
6	32	F	White	0.4	5.4	32.2	7	54.6	157	5.36	10.47	12.31	7.41	5.75	17.83	1.15	3.95	0.62	9.23	3.68	0.05
7	40	F	White	0.8	1.1	23.3	7.9	66.6	286	8.6	14.84	5.99	11.26	3.27	12.9	1	5.21	1.89	10.14	6	0.17
8	41	F	White	0.5	0.9	40.6	8.1	49.4	257	3.59	1.91	7.01	0.88	5.97	3.22	1.18	3.43	1.01	31.03	3.64	0.01
9	43	F	African American	0.8	0.4	46.8	6.5	45.1	199	<0.01	3.73	7.82	6.65	3.05	9.2	2.41	5.15	3.37	11.73	11.43	0.57
10	52	F	White	1.4	3.7	34.7	8.7	51.3	285	7.99	5.31	5.73	16.3	6.65	25.83	1.43	3.22	0.74	8.37	3.14	0.07
11	57	F	Asian	0.3	0.6	47.5	7.5	43.8	210	6.31	11.89	11.43	8.46	5.51	14.78	1.18	6.79	4.87	5.46	8.02	1.12
Males
12	24	M	Asian	1.6	3.4	36.4	7.6	51	299	4.19	0.67	18.44	9.98	16.79	12.03	0.93	3.09	1.57	8.36	3.65	0.01
13	25	M	White	0.4	1.1	42.6	9.7	45.4	200	5.8	7.24	5.68	10.24	5.3	8.99	2.44	11.18	6.95	11.79	5.33	0.2
14	26	M	Asian	0.4	2.2	32.6	6.3	58.1	223	5.76	2.75	8.18	8.38	8.46	13.05	1.03	7.74	4.89	9.22	9.16	0.29
15	29	M	African American	0.2	1	49.8	9.6	39.2	207	5.24	0.95	1.91	13.38	7.44	6.04	1.76	2.36	27.94	15.96	3.96	0.01
16	33	M	White	0.5	4.7	22.1	11.8	60.5	220	9.79	10.78	13.48	22.82	4.27	3.19	0.71	1.76	0.62	13.8	3.33	0.01
17	34	M	White	0.4	5.7	37.8	10	46.1	223	11.81	2.48	10.91	13.39	9.77	16.68	1.83	2.92	2.19	11.7	2.68	0.03
18	40	M	White	0.6	2.9	36	11.7	48.4	185	5.44	1.15	12.45	13.39	7.44	13.53	1.42	4.43	1.19	14.34	3.43	0.04
19	45	M	White	1.1	2.2	31.5	9.2	55.6	259	6.64	15.16	11.42	4.1	5.01	8.14	2.74	3.89	0.42	11.46	6.04	0.05
20	53	M	White	0.4	3.4	10.7	26.2	58.9	106	<0.01	18.8	3.59	49.14	2.26	0.57	0.83	1.5	0.5	5.61	4.03	0.05
21	56	M	Asian	0.9	1.8	37.1	10	49.8	264	3.75	6.94	16.24	12.05	1.3	2.49	3.22	5.82	6.44	10.43	7.83	0.08
Repeat Participant
Repeat-01	34	M	White	0.6	3.8	26.7	6.9	61.8	256	1.57	12.53	11.76	8.38	6.69	7.24	0.96	5.83	3.88	7.46	6.78	0.18
Repeat-02	34	M	White	0.7	4.5	24.7	5.9	63.7	252	1.42	11.71	10.01	10.7	6.78	5.02	0.35	6.28	2.75	4.98	11.81	0.62
Repeat-03	34	M	White	0.4	3.8	25.2	6.5	64.1	232	0.96	31.83	7.21	7.9	5.62	6.47	0.76	3.97	2.41	4.89	4.96	0.27
Repeat-04	34	M	White	0.4	5	27.7	6.6	59.7	240	1.27	26.09	7.23	2.44	6.12	5.7	1.35	4.1	2.12	10.12	5.15	0.03
Repeat-05	34	M	White	0.4	4.2	21.9	5.3	67.5	228	1.15	22.93	9.38	8.55	6.29	4.37	1.12	4.95	2.49	8.6	5.92	0.02
Repeat-06	34	M	White	0.4	5.3	25.3	6.1	62.7	242	1.44	23.19	9.03	10.28	6.5	7.02	1.13	4.39	3.03	7.97	4.85	0.13
Repeat-07	34	M	White	0.4	6.3	31.1	7.8	54	231	1.76	3.97	10.81	13.95	9.66	10.84	1.29	4.6	3.68	10.05	5.61	0.17
Repeat-08	34	M	White	0.4	5.4	37.4	7.9	48.5	244	1.81	4.76	5.65	14.18	11.36	9.02	1.41	4.69	2.22	14.53	8.09	0.1
Repeat-09	34	M	White	0.5	3.8	21	6.4	67.9	242	0.86	28.71	5.82	13.62	5.21	6.52	1.03	3.34	1.69	7.98	4.86	0.1
