# Supplementary material for: Mitochondrial phenotypes in purified human immune cell subtypes and cell mixtures
Source: eLife. 2021 Oct 26;10:e70899. doi: 10.7554/eLife.70899 (PMC8612706; doi:10.7554/eLife.70899)
Supplement: Supplementary file 3. — Coefficients of variation (CVs) across 2–5 biological replicates (different 5 M cell pellet isolated from the same blood draw) for each cell subtype and PBMCs (see Appendix 1 for details). MHI, mitochondrial health index; PBMC, peripheral blood mononuclear cell. [file elife-70899-supp3.xlsx]

## Sheet: Sheet1
Supplementary file 3
	Neutrophils	NK cells	Monocytes	CD8+ naïve	CD4+ naïve	CD8+ CM & EM	CD4+ CM & EM	PBMCs	Average
Measured parameters
Citrate synthase (CS)	0.091	0.055	0.041	0.046	0.067	0.066	0.069	0.071	0.062
mtDNAcn	0.066	0.046	0.042	0.054	0.049	0.06	0.04	0.048	0.051
Complex I	0.273	0.154	0.121	0.169	0.142	0.129	0.172	0.166	0.166
Complex II	0.076	0.089	0.092	0.089	0.087	0.142	0.11	0.06	0.098
Complex IV	0.145	0.336	0.194	0.181	0.403	0.241	0.236	0.138	0.248
Calculated parameters
MHI	0.09	0.106	0.077	0.127	0.104	0.108	0.114	0.061	0.104
