# Supplementary material for: Mitochondrial phenotypes in purified human immune cell subtypes and cell mixtures
Source: eLife. 2021 Oct 26;10:e70899. doi: 10.7554/eLife.70899 (PMC8612706; doi:10.7554/eLife.70899)
Supplement: Supplementary file 4. — FACS, fluorescence-activated cell sorting. [file elife-70899-supp4.xlsx]

## Sheet: Sheet1
Supplementary file 4
Counting cocktail contains markers for activated T cells and was used to label 2x106 cells to determine the abundance of each cell subtype prior to sorting.
Sorting cocktail contains markers for memory T cells, used to isolate subpopulations by FACS.
Cocktail		Marker	Fluorophore	Volume	Catalog number
Counting cocktail	1	CD20	A700	2.5ul	BioLegend 302322
	2	CD3	FITC	2.5ul	BioLegend 300406
	3	CD4	BV650	2.5ul	BioLegend 317435
	4	CD8	BV711	2.5ul	BioLegend 301043
	5	CD56	PE-Dazzle 594	2.5ul	BioLegend 362543
	6	CD16	APC-Cy7	2.5ul	BioLegend 302017
	7	CD14	PE-Cy7	2.5ul	BioLegend 367111
	8	HLA-DR	PerCP-Cy5.5	2.5ul	BioLegend 307629
	9	CD45	BV510	2.5ul	BioLegend 368525
	10	CD15	BV786	2.5ul	BioLegend 323043
	11	CD11c	BV605	2.5ul	BioLegend 301636
	12	CD69	PE	2.5ul	BioLegend 310906
	13	CD25	APC	2.5ul	BioLegend 356110
	14	Viability Dye	DAPI	2ug/l	BD 564907
Sorting cocktail	1	CD20	A700	25ul	BioLegend 302322
	2	CD3	FITC	25ul	BioLegend 300406
	3	CD4	BV650	25ul	BioLegend 317435
	4	CD8	BV711	25ul	BioLegend 301043
	5	CD56	PE-Dazzle 594	25ul	BioLegend 362543
	6	CD16	APC-Cy7	25ul	BioLegend 302017
	7	CD14	PE-Cy7	25ul	BioLegend 367111
	8	HLA-DR	PerCP-Cy5.5	25ul	BioLegend 307629
	9	CD45	BV510	25ul	BioLegend 368525
	10	CD15	BV786	25ul	BioLegend 323043
	11	CCR7	PE	25ul	BioLegend 353203
	12	CD45RA	APC	25ul	BioLegend 304111
	13	Viability Dye	DAPI	2ug/l	BD 564907
All tubes are 5 ml Polypropylene (ThremoFisher #352063)
